# Supplementary material
Source: publisher figshare collection journal article supplement (https://acs.figshare.com/ndownloader/files/15371264)
Supplement: Supplementary file 1 [file 15371264]

## *Supporting Information*

# **P-Chiral Monophosphorus Ligands for Asymmetric Copper-Catalyzed Allylic Alkylation**

Wenrui Xiong,<sup>a</sup> Guangqing Xu,<sup>b</sup> Xinhong Yu<sup>\*a</sup> and Wenjun Tang<sup>\*a, b</sup>

<sup>a</sup>Shanghai Key Laboratory of New Drug Design, School of Pharmacy, East China University of Science and Technology, 130 Meilong Road, Shanghai 200037, China

<sup>b</sup>State Key Laboratory of Bio-Organic and Natural Products Chemistry, Shanghai Institute of Organic Chemistry, Chinese Academy of Sciences, 345 Lingling Road, Shanghai 200032, China

\*E-mail: [tangwenjun@sioc.ac.cn](mailto:tangwenjun@sioc.ac.cn)

\*E-mail: [xhyu@ecust.edu.cn](mailto:xhyu@ecust.edu.cn)

## **Table of Contents**

|                                                                           |                 |
|---------------------------------------------------------------------------|-----------------|
| <b>1. General Considerations.....</b>                                     | <b>S2</b>       |
| <b>2. Procedure for the Preparation of (<i>E</i>)-Allyl Bromides.....</b> | <b>S2–S7</b>    |
| <b>3. The Synthesis of P-Chiral Monophosphorus Ligands.....</b>           | <b>S7–S12</b>   |
| <b>4. Optimization of Reaction Conditions.....</b>                        | <b>S12–S15</b>  |
| <b>5. X-Ray Crystallographic Data of Copper Complex.....</b>              | <b>S52–S53</b>  |
| <b>6. References.....</b>                                                 | <b>S54–S55</b>  |
| <b>7. NMR Spectra and HPLC chromatographs.....</b>                        | <b>S56–S108</b> |

## 1. General Considerations

Unless otherwise noted, all commercial reagents were purchased from commercial suppliers and used without further purification. All reactions were carried out under nitrogen atmosphere in oven-dried glassware using standard Schlenk techniques. All solvents were purified and dried according to the standard methods prior to use. The ligands, copper complex and allyl substrates were prepared by following the indicated procedures described in the literature. Racemic products were synthesized by reaction of the allyl bromides with the corresponding Grignard reagent at  $-78\text{ }^{\circ}\text{C}$  in dichloromethane in the presence of copper salt. Flash column chromatography was performed on silica gel (particle size 200–300 mesh, purchased from Canada) and eluted with petroleum ether/ethyl acetate.

$^1\text{H}$  NMR,  $^{13}\text{C}$  NMR,  $^{31}\text{P}$  NMR and  $^{19}\text{F}$  NMR spectra were recorded on a Bruker-Ultrashield PLUS400 NMR or a 500 MHz Agilent spectrometer with  $\text{CDCl}_3$  as the solvent.  $^1\text{H}$  chemical shifts were referenced to  $\text{CDCl}_3$  at 7.26 ppm.  $^{13}\text{C}$  chemical shifts were referenced to  $\text{CDCl}_3$  at 77.16 ppm and obtained with  $^1\text{H}$  decoupling.  $^{31}\text{P}$  chemical shifts were referenced to 85%  $\text{H}_3\text{PO}_4$  in  $\text{D}_2\text{O}$  at 0.0 ppm as external standard and obtained with  $^1\text{H}$  decoupling. Multiplicities are abbreviated as follows: singlet (s), doublet (d), triplet (t), quartet (q), doublet-doublet (dd), triplet-doublet (td), quintet (quint), sextet (sextet), septet (septet), multiplet (m), and broad (br). MS was measured on Shimadzu LCMS-2010EV (EI) or Brukerdaltonics APEX III (HR-EI) mass spectrometers. Chiral HPLC analysis were performed on an Agilent 1200 system using chiral column described below in detail. Chiral GC analysis were performed on an Agilent 6890N GC using chiral column described below in detail. The optical rotations were measured on a Jasco P-1010 polarimeter. Single crystals for X-ray structure determination were performed on SMART APEX CCD single-crystal diffractometer.

## 2. Procedure for the Preparation of (*E*)-Allyl Substrates

The unpurchased (*E*)-allyl substrates were synthesized from the corresponding aldehydes or ketones by a three-step Horner-Wadsworth-Emmons olefination/DIBAL-H reduction/bromination or esterification sequence.

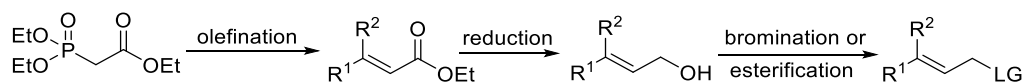

### 2.1 Procedure for the Horner-Wadsworth-Emmons Olefination

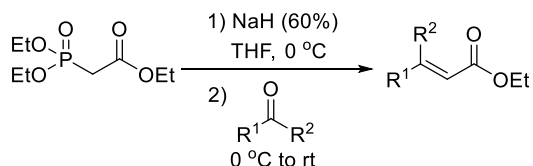

To a stirred suspension of NaH (60% in mineral oil, 1.6 equiv) in dry THF at  $0\text{ }^{\circ}\text{C}$  was added triethyl phosphonoacetate (1.6 equiv) dropwise and stirred for a further 1 h. The corresponding aldehydes or ketones (1.0 equiv) was dissolved in dry THF and added dropwise to the reaction mixture. After stirring for 24 h at rt, the solution was quenched with saturated  $\text{NH}_4\text{Cl}$  solution. The aqueous layer was extracted with EA and the combined organic layers were dried over anhydrous sodium sulfate, filtered and concentrated in vacuo to give the crude product as an *E*: *Z* mixture. The crude product was purified by column chromatography on silica gel with

*n*hexane/EA to give the desired (*E*)-allyl esters. <sup>1</sup>H NMR data of all compounds matched with those reports in the literature.<sup>1</sup>

## 2.2 Procedure for the DIBAL-H Reduction

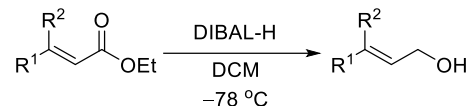

To a stirred solution of the corresponding (*E*)-allyl esters (1.0 equiv) in dry DCM at -78 °C was added dropwise DIBAL-H (1.5 M solution in toluene, 2.2 equiv). After the addition was complete, the solution was warmed to rt slowly and stirred overnight. Upon complete consumption of the starting material (as indicated by TLC), the reaction mixture was cooled to -78 °C and quenched with saturated aqueous NH<sub>4</sub>Cl solution. After stirred at rt for 30 min, the reaction mixture was treated with anhydrous sodium sulfate and the resulting suspension was further at rt for 30 min. The suspension was passed through a pad of celite and the organic phased was separated from the filtrate, dried, and concentrated to provide crude (*E*)-allyl alcohols, which was used directly in next step without further purification. <sup>1</sup>H NMR data of all compounds matched with those reported in the literature.<sup>2</sup>

## 2.3 Procedure for the Bromination Reaction

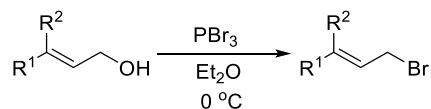

To a stirred solution of the corresponding (*E*)-allyl alcohols (1.0 equiv) in anhydrous Et<sub>2</sub>O at 0 °C was added dropwise neat PBr<sub>3</sub> (1.05 equiv). After stirring at this temperature for 2 h, the reaction mixture was quenched with cold saturated aqueous NH<sub>4</sub>Cl solution and warmed to rt. The organic layer was separated and washed with brine, dried over anhydrous sodium sulfate, filtered, and concentrated in vacuo to give the corresponding (*E*)-allyl bromides in nearly quantitative yield. NMR data of all compounds matched with those reported in the literature.<sup>3</sup>

**(*E*)-3-(4'-(Trifluoromethyl)phenyl)-allylbromide (1b):** 92% yield; yellow solid; <sup>1</sup>H NMR (500 MHz, CDCl<sub>3</sub>) δ 7.58 (d, *J* = 7.9 Hz, 2H), 7.47 (d, *J* = 7.9 Hz, 2H), 6.67 (d, *J* = 15.6 Hz, 1H), 6.49 (dd, *J* = 15.5, 7.7 Hz, 1H), 4.15 (d, *J* = 7.6 Hz, 2H); <sup>13</sup>C NMR (126 MHz, CDCl<sub>3</sub>) δ 139.3, 132.9, 130.0 (q, *J* = 32.6 Hz), 127.8, 126.9, 125.6 (q, *J* = 3.8 Hz), 125.1, 122.9, 32.4. The <sup>1</sup>H NMR and <sup>13</sup>C NMR spectra are in agreement with those reported in the literature.<sup>3a</sup>

**(*E*)-3-(4'-Bromophenyl)-allylbromide (1c):** 85% yield; grey solid; <sup>1</sup>H NMR (500 MHz, CDCl<sub>3</sub>) δ 7.49–7.42 (m, 2H), 7.32–7.20 (m, 2H), 6.58 (d, *J* = 15.6 Hz, 1H), 6.38 (dt, *J* = 15.5, 7.7 Hz, 1H), 4.13 (dd, *J* = 7.7, 0.9 Hz, 2H); <sup>13</sup>C NMR (126 MHz, CDCl<sub>3</sub>) δ 134.7, 133.3, 131.8, 128.2, 126.0, 122.2, 32.9. The <sup>1</sup>H NMR and <sup>13</sup>C NMR spectra are in agreement with those reported in the literature.<sup>3a</sup>

**(*E*)-3-(4'-Chlorophenyl)-allylbromide (1d):** 87% yield; white solid; <sup>1</sup>H NMR (500 MHz, CDCl<sub>3</sub>) δ 7.33–7.27 (m, 4H), 6.60 (d, *J* = 15.6 Hz, 1H), 6.37 (dt, *J* = 15.5, 7.8 Hz, 1H), 4.14 (dd, *J* = 7.8, 0.9 Hz, 2H); <sup>13</sup>C NMR (126 MHz, CDCl<sub>3</sub>) δ 134.3, 134.0, 133.2, 128.8, 127.9, 125.8, 33.0. The <sup>1</sup>H NMR and <sup>13</sup>C NMR spectra are in

agreement with those reported in the literature.<sup>3a</sup>

**(E)-3-(4'-Methylphenyl)-allylbromide (1e):** 82% yield; grey solid; <sup>1</sup>H NMR (500 MHz, CDCl<sub>3</sub>) δ 7.28 (t, *J* = 8.9 Hz, 2H), 7.14 (d, *J* = 7.0 Hz, 2H), 6.62 (d, *J* = 15.5 Hz, 1H), 6.35 (dt, *J* = 15.2, 7.5 Hz, 1H), 4.17 (d, *J* = 7.5 Hz, 2H), 2.35 (s, 3H); <sup>13</sup>C NMR (126 MHz, CDCl<sub>3</sub>) δ 138.3, 134.5, 133.0, 129.3, 126.7, 124.2, 33.8, 21.3. The <sup>1</sup>H NMR and <sup>13</sup>C NMR spectra are in agreement with those reported in the literature.<sup>3c</sup>

**(E)-3-(3'-Bromophenyl)-allylbromide (1f):** 89% yield; pale yellow oil; <sup>1</sup>H NMR (500 MHz, CDCl<sub>3</sub>) δ 7.53 (s, 1H), 7.39 (d, *J* = 7.9 Hz, 1H), 7.29 (d, *J* = 7.8 Hz, 1H), 7.19 (t, *J* = 7.8 Hz, 1H), 6.56 (d, *J* = 15.6 Hz, 1H), 6.39 (dt, *J* = 15.5, 7.7 Hz, 1H), 4.13 (d, *J* = 7.7 Hz, 2H); <sup>13</sup>C NMR (126 MHz, CDCl<sub>3</sub>) δ 137.9, 132.9, 131.2, 130.1, 129.5, 126.8, 125.4, 122.8, 32.6. The <sup>1</sup>H NMR and <sup>13</sup>C NMR spectra are in agreement with those reported in the literature.<sup>3c</sup>

**(E)-3-(3'-Chlorophenyl)-allylbromide (1g):** 92% yield; pale yellow oil; <sup>1</sup>H NMR (500 MHz, CDCl<sub>3</sub>) δ 7.37 (s, 1H), 7.25 (s, 3H), 6.58 (d, *J* = 15.6 Hz, 1H), 6.40 (dt, *J* = 15.5, 7.7 Hz, 1H), 4.14 (d, *J* = 7.7 Hz, 2H); <sup>13</sup>C NMR (126 MHz, CDCl<sub>3</sub>) δ 137.6, 134.6, 133.0, 129.9, 128.3, 126.7, 126.6, 124.9, 32.7. The <sup>1</sup>H NMR and <sup>13</sup>C NMR spectra are in agreement with those reported in the literature.<sup>3c</sup>

**(E)-3-(3'-Methylphenyl)-allylbromide (1h):** 85% yield; yellow oil; <sup>1</sup>H NMR (500 MHz, CDCl<sub>3</sub>) δ 7.30–7.21 (m, 3H), 7.13 (d, *J* = 7.2 Hz, 1H), 6.64 (d, *J* = 15.6 Hz, 1H), 6.42 (dt, *J* = 15.6, 7.8 Hz, 1H), 4.19 (d, *J* = 7.8 Hz, 2H), 2.39 (s, 3H); <sup>13</sup>C NMR (126 MHz, CDCl<sub>3</sub>) δ 138.2, 135.8, 134.7, 129.2, 128.6, 127.5, 125.0, 124.0, 33.7, 21.4. The <sup>1</sup>H NMR and <sup>13</sup>C NMR spectra are in agreement with those reported in the literature.<sup>3c</sup>

**(E)-3-(Cyclohexyl)-allylbromide (1i):** 83% yield; colorless oil; <sup>1</sup>H NMR (500 MHz, CDCl<sub>3</sub>) δ 5.71 (dd, *J* = 15.3, 6.4 Hz, 1H), 5.68–5.58 (m, 1H), 3.95 (d, *J* = 7.3 Hz, 2H), 1.99 (ddd, *J* = 11.2, 9.6, 3.2 Hz, 1H), 1.78–1.69 (m, 4H), 1.68–1.61 (m, 1H), 1.31–1.21 (m, 2H), 1.20–1.13 (m, 1H), 1.12–1.01 (m, 2H); <sup>13</sup>C NMR (126 MHz, CDCl<sub>3</sub>) δ 142.1, 123.9, 40.2, 33.4, 32.4, 26.0, 25.6. The <sup>1</sup>H NMR and <sup>13</sup>C NMR spectra are in agreement with those reported in the literature.<sup>3a</sup>

**(E)-3-(2'-Methylphenyl)-allylbromide (1l):** 80% yield; yellow oil; <sup>1</sup>H NMR (500 MHz, CDCl<sub>3</sub>) δ 7.45 (dd, *J* = 8.5, 4.5 Hz, 1H), 7.24–7.06 (m, 3H), 6.88 (d, *J* = 15.4 Hz, 1H), 6.30 (dt, *J* = 15.5, 7.8 Hz, 1H), 4.19 (dd, *J* = 7.8, 0.9 Hz, 2H), 2.37 (s, 3H); <sup>13</sup>C NMR (126 MHz, CDCl<sub>3</sub>) δ 135.8, 134.8, 132.2, 130.4, 128.2, 126.5, 126.2, 125.9, 33.6. The <sup>1</sup>H NMR and <sup>13</sup>C NMR spectra are in agreement with those reported in the literature.<sup>3a</sup>

**(E)-3-(1'-Naphthyl)-allylbromide (1m):** 86% yield; grey solid; <sup>1</sup>H NMR (500 MHz, CDCl<sub>3</sub>) δ 8.11 (d, *J* = 8.1 Hz, 1H), 7.87 (d, *J* = 7.8 Hz, 1H), 7.82 (d, *J* = 8.2 Hz, 1H), 7.63 (d, *J* = 7.1 Hz, 1H), 7.57–7.50 (m, 2H), 7.47 (t, *J* = 7.4 Hz, 1H), 7.42 (d, *J* = 15.3 Hz, 1H), 6.45 (dtd, *J* = 8.8, 7.7, 1.1 Hz, 1H), 4.28 (d, *J* = 7.7 Hz, 2H); <sup>13</sup>C NMR (126 MHz, CDCl<sub>3</sub>) δ 133.6, 133.4, 131.6, 131.1, 128.7, 128.6, 128.3, 126.3, 125.9, 125.6, 124.3, 123.5, 33.4. The <sup>1</sup>H NMR and <sup>13</sup>C NMR spectra are in agreement with those reported in the literature.<sup>3a</sup>

**(E)-3-(2'-Naphthyl)-allylbromide (1n):** 85% yield; white solid; <sup>1</sup>H NMR (500 MHz, CDCl<sub>3</sub>) δ 7.81 (t, *J* = 7.4 Hz, 3H), 7.75 (s, 1H), 7.59 (dd, *J* = 8.5, 1.1 Hz, 1H), 7.53–7.40 (m, 2H), 6.81 (d, *J* = 15.6 Hz, 1H), 6.53 (dt, *J* = 15.6, 7.8 Hz, 1H), 4.22 (d, *J* = 7.8 Hz, 2H); <sup>13</sup>C NMR (126 MHz, CDCl<sub>3</sub>) δ 134.7, 133.4, 133.3, 133.2, 128.4, 128.1, 127.7, 127.1, 126.4, 126.3, 125.5, 123.5, 33.6. The <sup>1</sup>H NMR and <sup>13</sup>C NMR spectra are in agreement with those reported in the literature.<sup>3c</sup>

**(E)-(4-Bromobut-2-en-2-yl)benzene (1o):** 85% yield; pale yellow oil; <sup>1</sup>H NMR (400 MHz, CDCl<sub>3</sub>) δ 7.43–7.37 (m, 2H), 7.37–7.30 (m, 2H), 7.30–7.23 (m, 1H), 6.08 (ddd, *J* = 8.5, 5.0, 1.3 Hz, 1H), 4.20 (d, *J* = 8.6 Hz, 2H), 2.14 (s, 3H); <sup>13</sup>C NMR (126 MHz, CDCl<sub>3</sub>) δ 142.7, 141.5, 128.3, 127.8, 125.9, 122.8, 29.4, 15.6. The <sup>1</sup>H NMR and <sup>13</sup>C NMR spectra are in agreement with those reported in the literature.<sup>3e</sup>



**(*E*)-1'-Bromo-4'-(4-bromobut-2-en-2-yl)benzene (1p):** 88% yield; pale yellow oil;  $^1\text{H}$  NMR (500 MHz,  $\text{CDCl}_3$ )  $\delta$  7.46 (d,  $J = 8.5$  Hz, 2H), 7.27 (d,  $J = 8.3$  Hz, 3H), 6.08 (t,  $J = 8.5$  Hz, 1H), 4.17 (d,  $J = 8.5$  Hz, 2H), 2.11 (s, 3H);  $^{13}\text{C}$  NMR (126 MHz,  $\text{CDCl}_3$ )  $\delta$  141.0, 140.3, 131.4, 127.5, 123.4, 121.8, 28.9, 15.5. The  $^1\text{H}$  NMR and  $^{13}\text{C}$  NMR spectra are in agreement with those reported in the literature.<sup>3e</sup>

**(*E*)-1'-Chloro-4'-(4-bromobut-2-en-2-yl)benzene (1q):** 80% yield; pale yellow oil;  $^1\text{H}$  NMR (500 MHz,  $\text{CDCl}_3$ )  $\delta$  7.35–7.28 (m, 4H), 6.07 (td,  $J = 8.5, 1.2$  Hz, 1H), 4.18 (d,  $J = 8.5$  Hz, 2H), 2.12 (s, 3H);  $^{13}\text{C}$  NMR (126 MHz,  $\text{CDCl}_3$ )  $\delta$  140.6, 140.2, 133.6, 128.5, 127.2, 123.3, 29.0, 15.6. The  $^1\text{H}$  NMR and  $^{13}\text{C}$  NMR spectra are in agreement with those reported in the literature.<sup>3b</sup>

**(*E*)-1'-Trifluoromethyl-4'-(4-bromobut-2-en-2-yl)benzene (1r):** 91% yield; white solid;  $^1\text{H}$  NMR (500 MHz,  $\text{CDCl}_3$ )  $\delta$  7.59 (d,  $J = 8.4$  Hz, 2H), 7.50 (d,  $J = 8.1$  Hz, 2H), 6.14 (t,  $J = 8.4$  Hz, 1H), 4.18 (d,  $J = 8.5$  Hz, 2H), 2.16 (s, 3H);  $^{13}\text{C}$  NMR (126 MHz,  $\text{CDCl}_3$ )  $\delta$  145.7, 140.0, 129.8–129.3 (m), 127.4, 126.2, 125.4–125.1 (m), 124.8, 123.0, 28.4, 15.5. The  $^1\text{H}$  NMR and  $^{13}\text{C}$  NMR spectra are in agreement with those reported in the literature.<sup>3f</sup>

**(*E*)-1'-Methyl-4'-(4-Bromobut-2-en-2-yl) benzene (1s):** 80% yield; colourless oil;  $^1\text{H}$  NMR (500 MHz,  $\text{CDCl}_3$ )  $\delta$  7.33 (d,  $J = 8.1$  Hz, 2H), 7.21–7.19 (m, 1H), 7.19–7.15 (m, 2H), 6.09 (dd,  $J = 8.5, 7.5$  Hz, 1H), 4.22 (d,  $J = 8.6$  Hz, 2H), 2.37 (s, 3H), 2.15 (s, 3H). The  $^1\text{H}$  NMR spectra is in agreement with those reported in the literature.<sup>3b</sup>

**(*E*)-1'-Methyl-3'-(4-bromobut-2-en-2-yl)benzene (1t):** 82% yield; yellow oil;  $^1\text{H}$  NMR (500 MHz,  $\text{CDCl}_3$ )  $\delta$  7.28–7.19 (m, 3H), 7.13 (d,  $J = 7.0$  Hz, 1H), 6.10 (t,  $J = 8.5$  Hz, 1H), 4.22 (d,  $J = 8.6$  Hz, 2H), 2.39 (s, 3H), 2.39 (s, 3H), 2.16 (s, 3H);  $^{13}\text{C}$  NMR (126 MHz,  $\text{CDCl}_3$ )  $\delta$  142.2, 141.6, 137.9, 128.6, 128.2, 126.7, 123.1, 122.6, 29.6, 21.5, 15.7. The  $^1\text{H}$  NMR and  $^{13}\text{C}$  NMR spectra are in agreement with those reported in the literature.<sup>3b</sup>

**(*E*)-1'-Bromo-3'-(4-bromobut-2-en-2-yl)benzene (1u):** 90% yield; pale yellow oil;  $^1\text{H}$  NMR (500 MHz,  $\text{CDCl}_3$ )  $\delta$  7.54 (d,  $J = 7.9$  Hz, 1H), 7.30–7.24 (m, 1H), 7.13 (ddd,  $J = 15.5, 7.9, 1.5$  Hz, 2H), 5.72 (td,  $J = 8.4, 1.3$  Hz, 1H), 4.13 (t,  $J = 6.5$  Hz, 2H), 2.08 (s, 3H);  $^{13}\text{C}$  NMR (126 MHz,  $\text{CDCl}_3$ )  $\delta$  144.6, 142.5, 132.8, 129.6, 128.7, 127.3, 126.0, 121.8, 28.2, 17.5. The  $^1\text{H}$  NMR and  $^{13}\text{C}$  NMR spectra are in agreement with those reported in the literature.<sup>3e</sup>

**(*E*)-1'-Chloro-3'-(4-bromobut-2-en-2-yl)benzene (1v):** 89% yield; yellow oil;  $^1\text{H}$  NMR (500 MHz,  $\text{CDCl}_3$ )  $\delta$  7.38 (s, 1H), 7.29–7.22 (m, 3H), 6.08 (t,  $J = 8.5$  Hz, 1H), 4.16 (d,  $J = 8.5$  Hz, 2H), 2.11 (s, 3H);  $^{13}\text{C}$  NMR (126 MHz,  $\text{CDCl}_3$ )  $\delta$  144.0, 140.0, 134.3, 127.8, 126.1, 124.1, 123.9, 28.9, 15.5. The  $^1\text{H}$  NMR and  $^{13}\text{C}$  NMR spectra are in agreement with those reported in the literature.<sup>3d</sup>

**(*E*)-1'-Trifluoromethyl-3'-(4-bromobut-2-en-2-yl)benzene (1w):** 90% yield; yellow oil;  $^1\text{H}$  NMR (500 MHz,  $\text{CDCl}_3$ )  $\delta$  7.65 (s, 1H), 7.58 (d,  $J = 7.7$  Hz, 1H), 7.54 (d,  $J = 7.4$  Hz, 1H), 7.46 (t,  $J = 7.8$  Hz, 1H), 6.14 (t,  $J = 8.4$  Hz, 1H), 4.19 (d,  $J = 8.5$  Hz, 2H), 2.17 (s, 3H);  $^{13}\text{C}$  NMR (126 MHz,  $\text{CDCl}_3$ )  $\delta$  143.0, 140.0, 129.2 (d,  $J = 1.1$  Hz), 128.8, 124.4 (q,  $J = 3.4$  Hz), 122.7 (q,  $J = 3.8$  Hz), 28.4, 15.3. The  $^1\text{H}$  NMR and  $^{13}\text{C}$  NMR spectra are in agreement with those reported in the literature.<sup>3b</sup>

**(*E*)-1'-Bromo-2'-(4-bromobut-2-en-2-yl)benzene (1x):** 83% yield; pale yellow oil;  $^1\text{H}$  NMR (500 MHz,  $\text{CDCl}_3$ )  $\delta$  7.54 (d,  $J = 7.9$  Hz, 1H), 7.29–7.25 (m, 1H), 7.13 (ddd,  $J = 15.5, 7.9, 1.5$  Hz, 2H), 5.72 (td,  $J = 8.4, 1.3$  Hz, 1H), 4.13 (d,  $J = 8.4$  Hz, 2H), 2.08 (s, 3H);  $^{13}\text{C}$  NMR (126 MHz,  $\text{CDCl}_3$ )  $\delta$  144.7, 142.6, 132.9, 129.6, 128.7, 127.3, 126.0, 121.8, 28.2, 17.5. The  $^1\text{H}$  NMR and  $^{13}\text{C}$  NMR spectra are in agreement with those reported in the literature.<sup>3b</sup>

**(*E*)-1'-(4-Bromobut-2-en-2-yl)naphthalene (1y):** 88% yield; pale yellow oil;  $^1\text{H}$  NMR (500 MHz,  $\text{CDCl}_3$ )  $\delta$  8.00–7.93 (m, 1H), 7.91–7.86 (m, 1H), 7.81 (t,  $J = 7.6$  Hz, 1H), 7.54–7.50 (m, 2H), 7.46 (dd,  $J = 8.1, 7.2$  Hz, 1H),

7.29 (dd,  $J = 7.0, 1.0$  Hz, 1H), 5.93 (td,  $J = 8.5, 1.4$  Hz, 1H), 4.28 (d,  $J = 8.5$  Hz, 2H), 2.24 (d,  $J = 1.2$  Hz, 3H);  $^{13}\text{C}$  NMR (126 MHz,  $\text{CDCl}_3$ )  $\delta$  142.1, 142.0, 133.8, 130.9, 128.4, 127.6, 126.1, 126.0, 125.8, 125.4, 125.3, 124.7, 28.7, 18.8. The  $^1\text{H}$  NMR and  $^{13}\text{C}$  NMR spectra are in agreement with those reported in the literature.<sup>3e</sup>

**(*E*)-2'-(4-Bromobut-2-en-2-yl)naphthalene (1z)**: 87% yield; white solid;  $^1\text{H}$  NMR (500 MHz,  $\text{CDCl}_3$ )  $\delta$  7.85–7.79 (m, 4H), 7.58 (dd,  $J = 8.6, 1.8$  Hz, 1H), 7.48 (ddd,  $J = 6.9, 5.7, 3.4$  Hz, 2H), 6.26 (td,  $J = 8.5, 1.3$  Hz, 1H), 4.27 (d,  $J = 8.5$  Hz, 2H), 2.26 (d,  $J = 1.0$  Hz, 3H);  $^{13}\text{C}$  NMR (126 MHz,  $\text{CDCl}_3$ )  $\delta$  141.3, 139.3, 133.3, 132.9, 128.2, 127.9, 127.5, 126.3, 126.1, 124.9, 124.0, 123.3, 29.4, 15.6. The  $^1\text{H}$  NMR and  $^{13}\text{C}$  NMR spectra are in agreement with those reported in the literature.<sup>3f</sup>

**(*E*)-(1-Bromohex-2-en-3-yl)benzene (1x')**: 85% yield; colourless oil;  $^1\text{H}$  NMR (500 MHz,  $\text{CDCl}_3$ )  $\delta$  7.36 (dd,  $J = 13.9, 6.9$  Hz, 5H), 6.00 (t,  $J = 8.6$  Hz, 1H), 4.22 (d,  $J = 8.6$  Hz, 2H), 2.59 (dd,  $J = 16.3, 8.5$  Hz, 2H), 1.42 (m, 2H), 0.91 (t,  $J = 7.2$  Hz, 6H). The  $^1\text{H}$  NMR spectra is in agreement with those reported in the literature.<sup>3f</sup>

**(*E*)-(1-Bromo-4-methylpent-2-en-3-yl)benzene (1y')**: 82% yield; pale yellow oil;  $^1\text{H}$  NMR (500 MHz,  $\text{CDCl}_3$ )  $\delta$  7.33–7.27 (m, 3H), 7.18 (dd,  $J = 7.9, 1.6$  Hz, 2H), 5.63 (t,  $J = 8.6$  Hz, 1H), 4.18 (d,  $J = 8.6$  Hz, 2H), 3.15 (dt,  $J = 14.0, 7.0$  Hz, 1H), 1.10 (d,  $J = 7.0$  Hz, 6H);  $^{13}\text{C}$  NMR (126 MHz,  $\text{CDCl}_3$ )  $\delta$  152.9, 141.5, 128.2, 127.7, 126.9, 123.9, 29.2, 28.0, 21.6, 21.3. The  $^1\text{H}$  NMR and  $^{13}\text{C}$  NMR spectra are in agreement with those reported in the literature.<sup>3e</sup>

## 2.4 Procedure for the Esterification Reaction

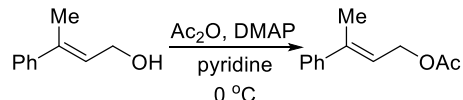

Allylic alcohol (1.8 mg, 12.4 mmol) and DMAP (76 mg, 0.62 mmol) were dissolved in pyridine (10 mL) at 0 °C. Acetic anhydride (5 mL) was added slowly at 0 °C. The solution was stirred at rt for 24 h and quenched with saturated aqueous  $\text{NaHCO}_3$  solution. It was then diluted with water (10 mL), extracted with  $\text{CH}_2\text{Cl}_2$  (3×20 mL), dried over anhydrous sodium sulfate and evaporated. The residue was purified by column chromatography on silica gel with *n*hexane/EA to afford the allylic acetate as liquid (85% yield).  $^1\text{H}$  NMR (400MHz,  $\text{CDCl}_3$ )  $\delta$  7.27–7.45 (m, 5H), 5.93 (td,  $J = 1.2, 6.9$  Hz, 1H), 4.82 (d,  $J = 6.9$  Hz, 2H), 2.14 (s, 3H), 2.12 (s, 3H).

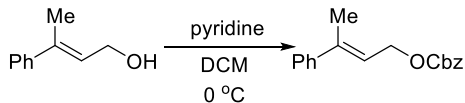

To a mixture of pyridine (2.4 mL, 30.0 mmol, 3.0 equiv), the allylic alcohol (1.5 g, 10.0 mmol, 1.0 equiv) and DCM (10 mL) was added benzyl chloroformate (2.8 mL, 20.0 mmol, 2.0 equiv) dropwise at 0 °C. The reaction mixture was allowed to warm to rt and stirred overnight (monitored by TLC). The mixture was then quenched with water (10 mL) and diluted with EA (10 mL). The organic layer was separated, washed sequentially with HCl solution (1M, 20 mL) and brine (20 mL), concentrated, and purified by column chromatography with *n*hexane/EA to give the allylic benzyl carbonate as a colorless oil (89% yield).  $^1\text{H}$  NMR (400 MHz,  $\text{CDCl}_3$ )  $\delta$  7.39 (t,  $J = 1.8$  Hz, 1H), 7.37 (s, 2H), 7.35 (t,  $J = 2.1$  Hz, 2H), 7.34–7.32 (m, 2H), 7.32–7.28 (m, 2H), 7.28–7.25 (m, 1H), 5.90 (dd,  $J = 7.6, 6.4$  Hz, 1H), 5.16 (s, 2H), 4.85 (d,  $J = 7.0$  Hz, 2H), 2.10 (s, 3H).

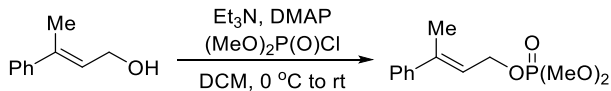

To a solution of allylic alcohol (1 g, 6.8 mmol, 1.0 equiv) and Et<sub>3</sub>N (1.4 mL, 10.1 mmol, 1.5 equiv) in DCM (15 mL), (MeO)<sub>2</sub>P(O)Cl (0.9 mL, 8.1 mmol, 1.2 equiv) and DMAP (247 mg, 2.02 mmol, 0.3 equiv) were sequentially added at 0 °C. The reaction mixture was allowed to warm to rt, stirred for another 12 h and then diluted with EA (10 mL) and water (10 mL). The organic layer was separated and the aqueous layer was extracted with EA (10 mL). The combined organic layer was washed with water and brine, dried over anhydrous sodium sulfate, and concentrated to provide crude allylic phosphate as a yellow oil (80% yield). <sup>1</sup>H NMR (500 MHz, CDCl<sub>3</sub>) δ 7.41 (d, *J* = 7.3 Hz, 2H), 7.34 (t, *J* = 7.4 Hz, 2H), 7.31–7.26 (m, 1H), 5.95 (td, *J* = 7.0, 1.1 Hz, 1H), 4.83–4.75 (m, 2H), 3.80 (s, 3H), 3.77 (s, 3H), 2.13 (s, 3H).

### 3. The Synthesis of P-Chiral Monophosphorus Ligands

Ligands **L1–L6**, **L9** and **L11** were prepared according to procedures described in our previous reports.<sup>4,6</sup> The synthesis of **L12–L18** was similar to the procedure for the synthesis of **L5** and **L6**.<sup>6a</sup> Ligands **L7**, **L8**, **L10** and **L19** were prepared according to procedures described as follows. The compound **A** was prepared according to a procedure described in our previous reports.<sup>4</sup>

#### 3.1 The Synthesis of **L7** and **L8**

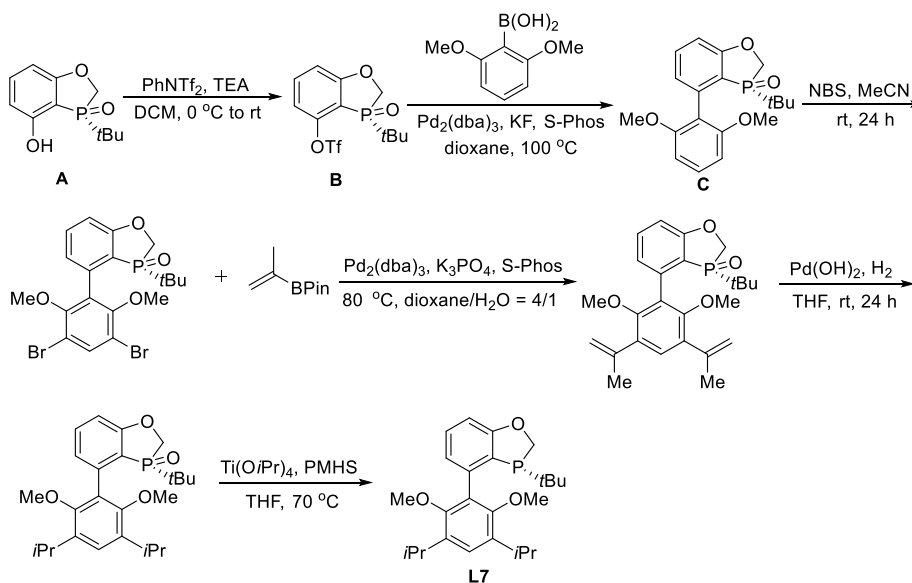

(1) To a solution of compound **A** (1.0 equiv) and triethylamine (4.0 equiv) in DCM at 0 °C was added Tf<sub>2</sub>NPh (1.2 equiv). The mixture was stirred at rt for 5 h and then quenched with addition of water. The organic layer was separated, dried over anhydrous sodium sulfate, concentrated, and purified by column chromatography with *n*hexane/EA to give the triflate product as a white solid (94% yield). (2) To a solution of the triflate product (1.0 equiv) and 2, 6-dimethoxyphenylboronic acid (1.5 equiv), Pd<sub>2</sub>(dba)<sub>3</sub> (1 mol %), S-Phos (3 mol %) and potassium fluoride (4.0 equiv) was charged degassed dioxane. The mixture was stirred at 100 °C under nitrogen for 10 h and then cooled to rt. The resulting mixture was removed most dioxane under a reduced pressure. And column chromatography was conducted with *n*hexane/EA to provide the coupling product as a white crystalline solid (90% yield). (3) The coupling product (1.0 equiv) and acetonitrile were charged into a flask. NBS (2.5 equiv) was added to the formed solution. The reaction mixture was stirred at rt for 16 h. Water and EA were added to the

reaction mixture. The mixture stirred for 20 min then the organic fraction is separated, washed with 2N HCl, dried over anhydrous sodium sulfate, filtered then concentrated. The crude product is purified by column chromatography with *n*hexane/EA to provide the desired bromide product as a white solid (82% yield). (4) To a solution of the bromide product (1.0 equiv) and isopropenylboronic acid pinacol ester (3.0 equiv), Pd<sub>2</sub>(dba)<sub>3</sub> (3 mol %), S-Phos (6 mol %) and potassium phosphate (6.0 equiv) was charged degassed dioxane and water. The mixture was stirred at 80 °C under nitrogen for 18 h and then cooled to rt. The resulting mixture was removed most solvent under a reduced pressure. And column chromatography was conducted with *n*hexane/EA to provide the coupling product as a white crystalline solid (76% yield). (5) The hydrogenation of the coupling product was performed in the presence of Pd(OH)<sub>2</sub> and H<sub>2</sub> in THF at rt for 16 h. After concentrated, the resulting mixture was directly performed column chromatography with *n*hexane/EA to provide the oxidation state product as a white crystalline solid (85% yield). (6) The oxaphosphole oxide was added to a Schlenk flask equipped with magnetic stirring bar. THF was charged followed by addition of PMHS and Ti(O*i*Pr)<sub>4</sub> (3.0 equiv). The reaction mixture was heated at 70 °C and monitored by <sup>31</sup>P NMR spectroscopy. The reaction mixture then was cooled to rt and quenched by dropwise addition of degassed 30 % NaOH at 0 °C, the resulting mixture was further stirred at 60 °C for 0.5 h. The aqueous layer was removed and subsequently extracted under nitrogen atmosphere. The combined organics were dried over anhydrous sodium sulfate then filtered through nitrogen-purged neutral alumina with Et<sub>2</sub>O. The solvents were removed under reduced pressure to afford ligand **L7** as a colourless oil (80% yield). <sup>1</sup>H NMR (500 MHz, CDCl<sub>3</sub>) δ 7.31 (t, *J* = 7.8 Hz, 1H), 7.13 (s, 1H), 7.03 (dd, *J* = 7.2, 2.9 Hz, 1H), 6.91 (dd, *J* = 8.1, 0.5 Hz, 1H), 4.82 (d, *J* = 12.5, 2.0 Hz, 1H), 4.57 (dd, *J* = 26.3, 12.5 Hz, 1H), 3.65 (s, 3H), 3.38 (dt, *J* = 13.8, 6.9 Hz, 1H), 3.32 (s, 3H), 3.25 (dt, *J* = 13.8, 6.9 Hz, 1H), 1.31 (d, *J* = 6.9 Hz, 3H), 1.27 (d, *J* = 7.0 Hz, 3H), 1.23 (d, *J* = 6.9 Hz, 3H), 1.12 (d, *J* = 6.9 Hz, 3H), 0.72 (d, *J* = 12.2 Hz, 9H); <sup>13</sup>C NMR (126 MHz, CDCl<sub>3</sub>) δ 163.7, 153.6, 152.6, 139.7 (d, *J* = 17.7 Hz), 138.0, 137.3, 130.0, 129.0, 125.0 (d, *J* = 16.0 Hz), 123.4, 123.3 (d, *J* = 4.1 Hz), 109.7, 70.6, 70.4, 62.3, 61.1, 30.74 (d, *J* = 19.7 Hz), 29.7, 26.9 (d, *J* = 14.8 Hz), 26.6 (d, *J* = 4.7 Hz), 24.4 (d, *J* = 5.5 Hz), 23.4 (d, *J* = 5.1 Hz); <sup>31</sup>P NMR (121 MHz, CDCl<sub>3</sub>) δ -4.8; ESI-MS: *m/z* 415.30 [M+H]<sup>+</sup>; HRMS (ESI) *m/z* calcd for C<sub>25</sub>H<sub>36</sub>O<sub>3</sub>P [M+H]<sup>+</sup>: 415.2402, found: 415.2397.

The synthesis of ligand **L8** was followed according to a similar experimental procedure. **L8**: 85% yield; White solid; <sup>1</sup>H NMR (500 MHz, CDCl<sub>3</sub>) δ 7.34–7.30 (m, 1H), 7.15 (s, 1H), 7.03 (ddd, *J* = 7.5, 3.2, 0.8 Hz, 1H), 6.92 (dd, *J* = 8.1, 0.8 Hz, 1H), 4.83 (dd, *J* = 12.5, 2.0 Hz, 1H), 4.57 (dd, *J* = 26.3, 12.5 Hz, 1H), 3.66 (s, 3H), 3.44–3.37 (m, 1H), 3.34 (s, 3H), 3.28 (dd, *J* = 17.4, 9.9 Hz, 1H), 2.11–1.94 (m, 4H), 1.89–1.77 (m, 4H), 1.74–1.60 (m, 6H), 1.43–1.26 (m, 2H), 0.73 (d, *J* = 12.2 Hz, 9H); <sup>13</sup>C NMR (126 MHz, CDCl<sub>3</sub>) δ 163.7, 154.4, 153.3, 139.71 (d, *J* = 17.7 Hz), 135.3, 134.8, 130.0, 128.9, 124.7, 123.3 (d, *J* = 4.1 Hz), 109.7, 70.7, 70.4, 62.4, 61.2, 38.6 (d, *J* = 12.0 Hz), 35.4, 34.7, 34.5, 34.2, 30.8 (d, *J* = 19.8 Hz), 26.9 (d, *J* = 14.7 Hz), 25.6 (dd, *J* = 17.3, 12.0 Hz); <sup>31</sup>P NMR (162 MHz, CDCl<sub>3</sub>) δ -6.1; ESI-MS: *m/z* 467.30 [M+H]<sup>+</sup>; HRMS (ESI) *m/z* calcd for C<sub>29</sub>H<sub>40</sub>O<sub>3</sub>P [M+H]<sup>+</sup>: 467.2715, found: 467.2703.

### 3.2 The Synthesis of L10

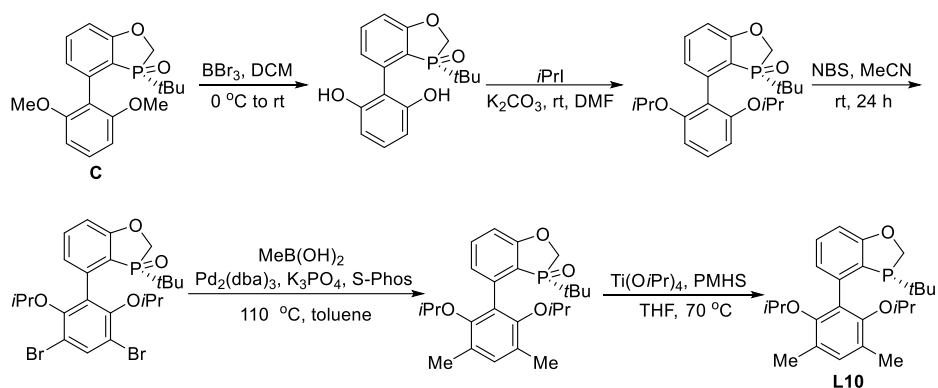

The synthesis of compound **B** was followed by the above description.

(1) Compound **B** (1.0 equiv) was placed in a dry Schlenk tube, then DCM was added and stirred to completely dissolve the material. The reaction system was transferred to an ice water bath and  $\text{BBr}_3$  (2.5 equiv, 1.0 M in DCM) was slowly added at 0 °C. After the completion of the dropwise addition, the reaction system was warmed to room temperature, stirred overnight and monitored by TLC. The reaction was quenched by adding MeOH. The residue was purified by column chromatography with *n*hexane/EA to give a white crystal product (91% yield). (2) The white crystal product (1.0 equiv) and anhydrous  $\text{K}_2\text{CO}_3$  (3.0 equiv) were placed in a dry Schlenk tube, DMF was added and stirred to dissolve the materials. *i*PrI (5.0 equiv) was then added to the reaction system. After complete conversion, the reaction mixture was concentrated and column chromatography was conducted with *n*hexane/EA to provide the product as a white solid (94% yield). (3) The product (1.0 equiv) and acetonitrile were charged into a flask. NBS (2.5 equiv) was added to the formed solution. The reaction mixture was stirred at rt for 16 h. Water and EA were added to the reaction mixture. The mixture stirred for 20 min then the organic fraction is separated, washed with 2N HCl, dried over anhydrous sodium sulfate, filtered then concentrated. The crude product is purified by column chromatography with *n*hexane/EA to provide the desired bromide product as a white solid (85% yield). (4) To a solution of the bromide product (1.0 equiv) and methyl-boric acid (3.0 equiv),  $\text{Pd}_2(\text{dba})_3$  (3 mol %), S-Phos (6 mol %) and potassium phosphate (6.0 equiv) was charged dry toluene. The mixture was stirred at 110 °C under nitrogen for 18 h and then cooled to rt. The resulting mixture was removed most solvent under a reduced pressure and filtered over celite. After concentrated, column chromatography was conducted with *n*hexane/EA to provide the coupling product as a white crystalline solid (76% yield). (5) The oxaphosphole oxide was added to a Schlenk flask equipped with magnetic stirbar. THF was charged followed by addition of PMHS and  $\text{Ti}(\text{O}i\text{Pr})_4$  (3.0 equiv). The reaction mixture was heated at 70 °C and monitored by  $^{31}\text{P}$  NMR spectroscopy. The reaction mixture then was cooled to rt and quenched by dropwise addition of degassed 30 % NaOH at 0 °C, the resulting mixture was further stirred at 60 °C for 0.5 h. The aqueous layer was removed and subsequently extracted under nitrogen atmosphere. The combined organics were dried over anhydrous sodium sulfate then filtered through nitrogen-purged neutral alumina with  $\text{Et}_2\text{O}$ . The solvents were removed under reduced pressure to afford ligand **L10** as a colourless oil (87% yield).  $^1\text{H}$  NMR (500 MHz,  $\text{CDCl}_3$ )  $\delta$  7.30 (t,  $J$  = 7.8 Hz, 1H), 7.16 (dd,  $J$  = 7.1, 3.6, 1H), 6.97 (s, 1H), 6.90 (dd,  $J$  = 8.0, 0.8 Hz, 1H), 4.86 (dd,  $J$  = 12.5, 1.9 Hz, 1H), 4.54 (dd,  $J$  = 26.4, 12.5 Hz, 1H), 3.88 (dt,  $J$  = 12.2, 6.1 Hz, 1H), 3.61 (dq,  $J$  = 12.3, 6.1 Hz, 1H), 2.27 (s, 3H), 2.22 (s, 3H), 1.07 (d,  $J$  = 6.1 Hz, 3H), 1.03 (d,  $J$  = 6.1 Hz, 3H), 0.98 (d,  $J$  = 6.1 Hz, 3H), 0.82 (d,  $J$  = 6.2 Hz, 3H), 0.78 (d,  $J$  = 12.2 Hz, 9H);  $^{13}\text{C}$  NMR (126 MHz,  $\text{CDCl}_3$ )  $\delta$  163.9, 152.2, 151.8, 140.1, 139.9, 131.8, 130.2,

128.9, 127.3, 126.6, 124.3 (d,  $J = 4.3$  Hz), 109.8, 75.4, 73.9, 70.5, 70.3, 30.8, 30.6, 27.1 (d,  $J = 14.9$  Hz), 22.7 (d,  $J = 2.4$  Hz), 22.4, 22.0, 17.1, 16.8;  $^{31}\text{P}$  NMR (162 MHz,  $\text{CDCl}_3$ )  $\delta$  -4.8; ESI-MS:  $m/z$  415.30  $[\text{M}+\text{H}]^+$ ; HRMS (ESI)  $m/z$  calcd for  $\text{C}_{25}\text{H}_{36}\text{O}_3\text{P}$   $[\text{M}+\text{H}]^+$ : 415.2402, found: 415.2397.

### 3.3 The Synthesis of L19

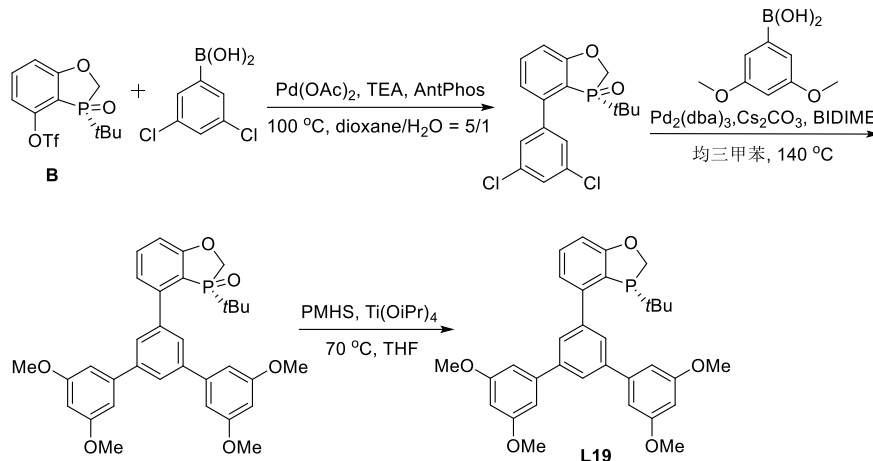

(1) To a mixture of compound **B** (1.0 equiv) and 3, 5-dichlorophenylboronic acid (2.0 equiv),  $\text{Pd}(\text{OAc})_2$  (5 mol %), Antphos (10 mol %) and TEA (3.0 equiv) was charged degassed dioxane/ $\text{H}_2\text{O}$ . The mixture was stirred under nitrogen for 24 h at 100 °C, concentrated, partitioned with water and DCM. The DCM layer was dried over anhydrous sodium sulfate, concentrated, and purified by column chromatography with *n*hexane/EA to provide pure product (55% yield). (2) To a solution of the pure product (1.0 equiv) and 3, 5-dimethoxyphenylboronic acid (6.0 equiv),  $\text{Pd}_2(\text{dba})_3$  (10 mol %), BI-DIME (20 mol %) and  $\text{Cs}_2\text{CO}_3$  (8.0 equiv) was charged degassed mesitylene. The mixture was stirred at 140 °C under nitrogen for 24 h and then cooled to rt. The resulting mixture was concentrated and purified by column chromatography with *n*hexane/EA to provide the oxidation state of **L19** (92% yield). (3) To a solution of oxidation state of **L19** (1.0 equiv) in THF at rt was added PMHS (3.0 equiv) and  $\text{Ti}(\text{O}i\text{Pr})_4$  (3.0 equiv). The reaction mixture was heated at 70 °C and monitored by  $^{31}\text{P}$  NMR spectroscopy. The reaction mixture then was cooled to rt and quenched by dropwise addition of degassed 30 % NaOH at 0 °C, the resulting mixture was further stirred at 60 °C for 0.5 h. The aqueous layer was removed and subsequently extracted under nitrogen atmosphere. The combined organics were dried over anhydrous sodium sulfate then filtered through nitrogen-purged neutral alumina with  $\text{Et}_2\text{O}$ . The solvents were removed under reduced pressure to afford ligand **L19** as a white solid (75% yield).  $^1\text{H}$  NMR (500 MHz,  $\text{CDCl}_3$ )  $\delta$  7.97 (d,  $J = 1.6$  Hz, 2H), 7.74 (t,  $J = 1.6$  Hz, 1H), 7.41–7.37 (m, 1H), 7.13 (dd,  $J = 6.7, 3.5$  Hz, 1H), 6.96 (dd,  $J = 8.1, 0.8$  Hz, 1H), 6.87 (d,  $J = 2.3$  Hz, 4H), 6.51 (s, 2H), 4.88 (dd,  $J = 12.6, 1.9$  Hz, 1H), 4.63 (dd,  $J = 26.0, 12.6$  Hz, 1H), 3.88 (s, 12H), 0.69 (d,  $J = 12.1$  Hz, 9H);  $^{13}\text{C}$  NMR (126 MHz,  $\text{CDCl}_3$ )  $\delta$  166.0 (d,  $J = 19.2$  Hz), 161.2, 146.3 (d,  $J = 5.5$  Hz), 142.9, 141.9, 141.5 (d,  $J = 1.5$  Hz), 135.0, 127.6, 125.7, 123.3 (d,  $J = 7.9$  Hz), 113.0 (d,  $J = 5.2$  Hz), 105.6, 99.7, 65.7 65.2, 55.6, 34.3, 33.8, 24.1;  $^{31}\text{P}$  NMR (162 MHz,  $\text{CDCl}_3$ )  $\delta$  -10.6; ESI-MS:  $m/z$  543.20  $[\text{M}+\text{H}]^+$ ; HRMS (ESI)  $m/z$  calcd for  $\text{C}_{33}\text{H}_{36}\text{O}_5\text{P}$   $[\text{M}+\text{H}]^+$ : 543.2300, found: 543.2302.

### 3.4 Characterization Data of New P-Chiral Monophosphorus Ligands

**L12**: 85% yield; White solid;  $^1\text{H}$  NMR (500 MHz,  $\text{CDCl}_3$ )  $\delta$  7.34 (t,  $J = 7.8$  Hz, 1H), 7.29 (s, 1H), 7.22 (s, 2H), 7.15 (s, 2H), 6.94 (dd,  $J = 11.4, 6.0$  Hz, 4H), 4.88 (d,  $J = 12.3$  Hz, 1H), 4.59 (dd,  $J = 25.5, 12.6$  Hz, 1H), 3.36 (s,

3H), 3.26 (s, 3H), 2.35 (d,  $J = 3.7$  Hz, 12H), 0.91 (d,  $J = 12.1$  Hz, 9H);  $^{13}\text{C}$  NMR (126 MHz,  $\text{CDCl}_3$ )  $\delta$  163.7, 155.3, 154.5, 139.6 (d,  $J = 18.1$  Hz), 138.8, 138.6, 137.7, 137.5, 133.0, 130.8, 130.2 (d,  $J = 9.2$  Hz), 128.5, 127.0, 126.5, 123.1 (d,  $J = 3.9$  Hz), 109.7, 61.2, 60.9, 31.9, 30.9 (d,  $J = 19.2$  Hz), 29.7 (d,  $J = 4.8$  Hz), 29.3, 27.0 (d,  $J = 14.6$  Hz), 22.7, 21.4, 14.1;  $^{31}\text{P}$  NMR (121 MHz,  $\text{CDCl}_3$ )  $\delta$  -11.1; ESI-MS:  $m/z$  539.40  $[\text{M}+\text{H}]^+$ ; HRMS (ESI)  $m/z$  calcd for  $\text{C}_{35}\text{H}_{40}\text{O}_3\text{P}$   $[\text{M}+\text{H}]^+$ : 539.2715, found: 539.2716.

**L13**: 80% yield; White solid;  $^1\text{H}$  NMR (500 MHz,  $\text{CDCl}_3$ )  $\delta$  7.44 (d,  $J = 1.7$  Hz, 2H), 7.43 (s, 1H), 7.42 (d,  $J = 1.6$  Hz, 2H), 7.39 (d,  $J = 1.8$  Hz, 2H), 7.35 (d,  $J = 7.8$  Hz, 1H), 6.98–6.96 (m, 1H), 6.94 (d,  $J = 8.1$  Hz, 1H), 4.87 (d,  $J = 12.5$  Hz, 1H), 4.54 (dd,  $J = 25.6$ , 12.6 Hz, 1H), 3.33 (s, 3H), 3.32 (s, 3H), 1.35 (s, 18H), 1.34 (s, 18H), 0.93 (d,  $J = 12.2$  Hz, 9H);  $^{13}\text{C}$  NMR (126 MHz,  $\text{CDCl}_3$ )  $\delta$  163.7, 155.3, 154.6, 150.7, 150.4, 140.2, 140.0, 138.0, 137.7, 132.9, 131.4, 130.3 (d,  $J = 10.2$  Hz), 130.0, 123.6, 123.0 (d,  $J = 18.9$  Hz), 120.7 (d,  $J = 19.2$  Hz), 109.7, 70.8, 70.6, 61.1 (d,  $J = 5.4$  Hz), 60.9, 34.9 (d,  $J = 2.0$  Hz), 31.5 (d,  $J = 7.6$  Hz), 30.9 (d,  $J = 19.4$  Hz), 27.0 (d,  $J = 14.7$  Hz);  $^{31}\text{P}$  NMR (162 MHz,  $\text{CDCl}_3$ )  $\delta$  -9.3; ESI-MS:  $m/z$  707.45  $[\text{M}+\text{H}]^+$ ; HRMS (ESI)  $m/z$  calcd for  $\text{C}_{47}\text{H}_{64}\text{O}_3\text{P}$   $[\text{M}+\text{H}]^+$ : 707.4593, found: 707.4574.

**L15**: 83% yield; White solid;  $^1\text{H}$  NMR (500 MHz,  $\text{CDCl}_3$ )  $\delta$  7.36–7.32 (m, 2H), 6.97–6.88 (m, 2H), 6.78 (d,  $J = 2.3$  Hz, 2H), 6.70 (d,  $J = 2.3$  Hz, 2H), 6.45 (t,  $J = 2.3$  Hz, 2H), 4.87 (dd,  $J = 12.5$ , 1.6 Hz, 1H), 4.56 (dd,  $J = 25.5$ , 12.6 Hz, 1H), 3.82 (s, 6H), 3.80 (s, 6H), 3.42 (s, 3H), 3.30 (s, 3H), 0.89 (d,  $J = 12.1$  Hz, 9H);  $^{13}\text{C}$  NMR (126 MHz,  $\text{CDCl}_3$ )  $\delta$  163.7, 160.6 (d,  $J = 19.6$  Hz), 155.6, 154.9, 140.7 (d,  $J = 15.7$  Hz), 139.4 (d,  $J = 18.2$  Hz), 132.5, 130.5, 130.4 (d,  $J = 1.2$  Hz), 130.3, 129.7, 125.0 (d,  $J = 15.7$  Hz), 122.8 (d,  $J = 3.9$  Hz), 109.8, 107.3, 106.7, 99.3 (d,  $J = 3.3$  Hz), 70.8, 70.6, 61.2, 61.0 (d,  $J = 4.2$  Hz), 55.4 (d,  $J = 9.4$  Hz), 30.9 (d,  $J = 19.4$  Hz), 26.9 (d,  $J = 14.7$  Hz);  $^{31}\text{P}$  NMR (162 MHz,  $\text{CDCl}_3$ )  $\delta$  -8.6; ESI-MS:  $m/z$  603.40  $[\text{M}+\text{H}]^+$ ; HRMS (ESI)  $m/z$  calcd for  $\text{C}_{35}\text{H}_{40}\text{O}_7\text{P}$   $[\text{M}+\text{H}]^+$ : 603.2512, found: 603.2513.

**L16**: 86% yield; White solid;  $^1\text{H}$  NMR (500 MHz,  $\text{CDCl}_3$ )  $\delta$  7.58 (d,  $J = 8.5$  Hz, 2H), 7.48 (d,  $J = 8.6$  Hz, 2H), 7.33 (t,  $J = 7.8$  Hz, 1H), 7.30 (s, 1H), 6.94 (t,  $J = 8.3$  Hz, 6H), 4.88 (d,  $J = 12.6$  Hz, 1H), 4.60 (dd,  $J = 25.6$ , 12.5 Hz, 1H), 3.84 (d,  $J = 2.3$  Hz, 6H), 3.36 (s, 3H), 3.19 (s, 3H), 0.89 (d,  $J = 12.1$  Hz, 9H);  $^{13}\text{C}$  NMR (126 MHz,  $\text{CDCl}_3$ )  $\delta$  163.6, 158.7 (d,  $J = 5.7$  Hz), 155.1, 154.3, 139.5 (d,  $J = 18.1$  Hz), 132.4, 131.2, 130.9, 130.5 (d,  $J = 7.6$  Hz), 130.20 (d,  $J = 18.4$  Hz), 129.8 (d,  $J = 16.2$  Hz), 125.0 (d,  $J = 15.2$  Hz), 123.0 (d,  $J = 4.0$  Hz), 113.8, 113.6, 109.7, 70.7, 70.5, 61.0, 60.6 (d,  $J = 2.7$  Hz), 55.2, 30.9 (d,  $J = 19.3$  Hz), 29.7, 27.0 (d,  $J = 14.7$  Hz);  $^{31}\text{P}$  NMR (121 MHz,  $\text{CDCl}_3$ )  $\delta$  -6.9; ESI-MS:  $m/z$  543.30  $[\text{M}+\text{H}]^+$ ; HRMS (ESI)  $m/z$  calcd for  $\text{C}_{33}\text{H}_{36}\text{O}_5\text{P}$   $[\text{M}+\text{H}]^+$ : 543.2300, found: 543.2302.

**L17**: 82% yield; White solid;  $^1\text{H}$  NMR (500 MHz,  $\text{CDCl}_3$ )  $\delta$  7.37 (t,  $J = 14.6$ , 6.8 Hz, 1H), 7.35 (s, 1H), 6.95 (dd,  $J = 11.8$ , 5.3 Hz, 2H), 6.83 (s, 2H), 6.79 (s, 2H), 4.89 (dd,  $J = 12.6$ , 1.5 Hz, 1H), 4.56 (dd,  $J = 25.5$ , 12.6 Hz, 1H), 3.91 (s, 3H), 3.90 (s, 3H), 3.89 (s, 6H), 3.87 (s, 6H), 3.41 (s, 3H), 3.35 (s, 3H), 0.92 (d,  $J = 12.1$  Hz, 9H);  $^{13}\text{C}$  NMR (126 MHz,  $\text{CDCl}_3$ )  $\delta$  163.8, 155.3, 154.8, 153.1 (d,  $J = 16.7$  Hz), 139.5 (d,  $J = 18.3$  Hz), 137.2 (d,  $J = 2.1$  Hz), 134.2 (d,  $J = 13.2$  Hz), 132.2, 130.5, (d,  $J = 5.1$  Hz), 129.7, 122.8, 110.0, 106.4, 105.8, 61.2, 61.0 (d,  $J = 6.1$  Hz), 56.2 (d,  $J = 16.1$  Hz), 31.0 (d,  $J = 19.1$  Hz), 27.0 (d,  $J = 14.6$  Hz);  $^{31}\text{P}$  NMR (162 MHz,  $\text{CDCl}_3$ )  $\delta$  -9.1; ESI-MS:  $m/z$  663.30  $[\text{M}+\text{H}]^+$ ; HRMS (ESI)  $m/z$  calcd for  $\text{C}_{37}\text{H}_{44}\text{O}_9\text{P}$   $[\text{M}+\text{H}]^+$ : 663.2723, found: 663.2723.

**L18:** 83% yield; White solid;  $^1\text{H}$  NMR (500 MHz,  $\text{CDCl}_3$ )  $\delta$  7.30 (d,  $J$  = 7.8 Hz, 1H), 7.22 (dd,  $J$  = 14.2, 5.9 Hz, 2H), 7.08 (dd,  $J$  = 7.1, 2.7 Hz, 1H), 6.91 (s, 1H), 6.88 (d,  $J$  = 8.0 Hz, 1H), 6.62 (dd,  $J$  = 15.0, 7.4 Hz, 4H), 4.83 (dd,  $J$  = 12.4, 2.0 Hz, 1H), 4.58 (d,  $J$  = 14.2 Hz, 1H), 3.82 (s, 3H), 3.78 (s, 3H), 3.76 (s, 3H), 3.65 (s, 3H), 3.36 (s, 3H), 3.20 (s, 3H), 0.88 (d,  $J$  = 12.0 Hz, 9H);  $^{13}\text{C}$  NMR (126 MHz,  $\text{CDCl}_3$ )  $\delta$  163.7, 158.5 (d,  $J$  = 18.8 Hz), 158.1 (d,  $J$  = 4.3 Hz), 156.3, 155.0, 139.7 (d,  $J$  = 17.1 Hz), 135.7, 130.0, 128.6, 128.3, 128.1, 124.1 (d,  $J$  = 4.1 Hz), 123.0, 122.1, 117.4 (d,  $J$  = 12.1 Hz), 109.3, 105.3, 104.3 (d,  $J$  = 12.8 Hz), 103.9, 60.6 (d,  $J$  = 6.4 Hz), 56.0, 55.7 (d,  $J$  = 2.7 Hz), 30.8 (d,  $J$  = 17.4 Hz), 27.3 (d,  $J$  = 14.3 Hz);  $^{31}\text{P}$  NMR (162 MHz,  $\text{CDCl}_3$ )  $\delta$  -6.4; ESI-MS:  $m/z$  603.30  $[\text{M}+\text{H}]^+$ ; HRMS (ESI)  $m/z$  calcd for  $\text{C}_{35}\text{H}_{40}\text{O}_7\text{P}$   $[\text{M}+\text{H}]^+$ : 603.2512, found: 603.2510.

## 4. Optimization of Reaction Conditions

**Table S1.** Cu-catalyzed asymmetric allylic alkylation of cinnamyl chloride (**1**) with EtMgBr (**2a**) by employing different copper salts and (*R*)-BIDIME.<sup>a</sup>

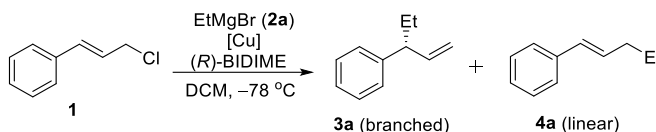

| Entry           | 5 mol % [Cu]                            | 6 mol % <b>L</b>    | <b>3a:4a</b> <sup>b</sup> |
|-----------------|-----------------------------------------|---------------------|---------------------------|
| 1               | --                                      | --                  | 23/77                     |
| 2               | CuI                                     | ( <i>R</i> )-BIDIME | 7/93                      |
| 3               | CuBr                                    | ( <i>R</i> )-BIDIME | 5/95                      |
| 4               | CuCl                                    | ( <i>R</i> )-BIDIME | 0/100                     |
| 5               | CuBr.SMe <sub>2</sub>                   | ( <i>R</i> )-BIDIME | 7/93                      |
| 6               | [Cu(MeCN) <sub>4</sub> ]PF <sub>6</sub> | ( <i>R</i> )-BIDIME | 10/90                     |
| 7               | Cu(OAc) <sub>2</sub>                    | ( <i>R</i> )-BIDIME | 9/91                      |
| 8               | CuOAc                                   | ( <i>R</i> )-BIDIME | 0/100                     |
| 9               | Cu(OTf) <sub>2</sub>                    | ( <i>R</i> )-BIDIME | 9/91                      |
| 10              | (CuOTf) <sub>2</sub> ·toluene           | ( <i>R</i> )-BIDIME | 9/91                      |
| 11              | (CuOTf) <sub>2</sub> ·benzene           | ( <i>R</i> )-BIDIME | 9/91                      |
| 12              | CuTc                                    | ( <i>R</i> )-BIDIME | 0/100                     |
| 13              | CuCN                                    | ( <i>R</i> )-BIDIME | 93/7                      |
| 14 <sup>c</sup> | CuCN                                    | ( <i>R</i> )-BIDIME | 80/20                     |
| 15 <sup>d</sup> | CuCN                                    | ( <i>R</i> )-BIDIME | 96/4                      |

<sup>a</sup>Unless otherwise specified, the reactions were performed under nitrogen in DCM at  $-78^\circ\text{C}$  in the presence of 5 mol % [Cu] and 6 mol % **L** with cinnamyl chloride (**1**, 0.25 mmol, 1.0 equiv) and EtMgBr (3 M solution in diethyl ether, 0.5 mmol, 2.0 equiv). Slow addition of EtMgBr over 0.5 h. <sup>b</sup>All reactions gave full conversion. The ratios of **3a/4a** were determined by  $^1\text{H}$  NMR spectroscopy. <sup>c</sup>The reaction was performed under nitrogen in DCM at  $-78^\circ\text{C}$  in the presence of 2.5 mol % CuCN and 3 mol % **L** with cinnamyl chloride (**1**, 0.25 mmol, 1.0 equiv) and EtMgBr (3 M solution in diethyl ether, 0.5 mmol, 2.0 equiv). <sup>d</sup>The reaction was performed under nitrogen in DCM at  $-78^\circ\text{C}$  in the presence of 10 mol % CuCN and 12 mol % **L** with cinnamyl chloride (**1**, 0.25 mmol, 1.0 equiv) and EtMgBr (3 M solution in diethyl ether, 0.5 mmol, 2.0 equiv).



**Table S2. The preliminary investigation of different ligands for the copper catalyzed asymmetric allylic alkylation.<sup>a</sup>**

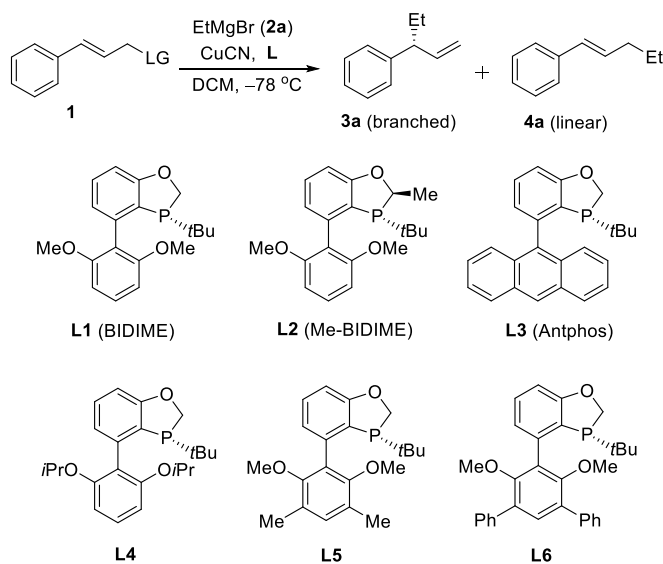

| Entry | LG | 5 mol % [Cu] | 6 mol % <b>L</b> | <b>3a:4a</b> <sup>b</sup> | <i>er</i> ( <b>3a</b> ) <sup>c</sup> |
|-------|----|--------------|------------------|---------------------------|--------------------------------------|
| 1     | Cl | CuCN         | <b>L1</b>        | 93:7                      | 53:47                                |
| 2     | Br | CuCN         | <b>L1</b>        | 62:38                     | 56:44                                |
| 3     | Cl | CuCN         | <b>L2</b>        | 97:3                      | 51:49                                |
| 4     | Br | CuCN         | <b>L2</b>        | 60:40                     | 53:47                                |
| 5     | Cl | CuCN         | <b>L3</b>        | 91:9                      | 53:47                                |
| 6     | Br | CuCN         | <b>L3</b>        | 53:47                     | 54:46                                |
| 7     | Cl | CuCN         | <b>L4</b>        | 98:2                      | 52:48                                |
| 8     | Br | CuCN         | <b>L4</b>        | 28:72                     | 53:47                                |
| 9     | Cl | CuCN         | <b>L5</b>        | 93:7                      | 64:36                                |
| 10    | Br | CuCN         | <b>L5</b>        | 60:40                     | 86:14                                |
| 11    | Cl | CuCN         | <b>L6</b>        | 96:4                      | 56:44                                |
| 12    | Br | CuCN         | <b>L6</b>        | 72:28                     | 85:15                                |

<sup>a</sup>Unless otherwise specified, the reactions were performed under nitrogen in DCM at -78 °C in the presence of **5** mol % [Cu] and 6 mol % **L** with allyl substrates (**1**, 0.25 mmol, 1.0 equiv) and EtMgBr (3 M solution in diethyl ether, 0.5 mmol, 2.0 equiv). Slow addition of EtMgBr over 0.5 h. <sup>b</sup>All reactions gave full conversion. The ratios of **3a/4a** were determined by <sup>1</sup>H NMR spectroscopy. <sup>c</sup>The *er* values of **3a** were determined by chiral HPLC analysis.

**Table S3. The further optimization of reaction conditions for the copper catalyzed asymmetric allylic alkylation.<sup>a</sup>**

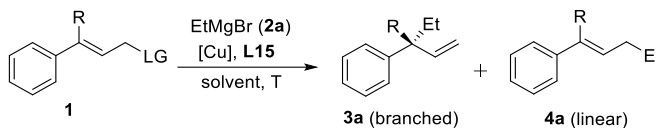

| Entry           | R  | LG                    | [Cu]                                            | L              | 3a:4a <sup>b</sup> | er (3a) <sup>c</sup> |
|-----------------|----|-----------------------|-------------------------------------------------|----------------|--------------------|----------------------|
| 1               | H  | Br                    | 5 mol % CuCN                                    | 6 mol % L15    | 76:24              | 93:7                 |
| 2 <sup>d</sup>  | H  | Br                    | 5 mol % CuCN                                    | 6 mol % L15    | 79:21              | 54:46                |
| 3 <sup>e</sup>  | H  | Br                    | 5 mol % CuCN                                    | 6 mol % L15    | 87:13              | 53:47                |
| 4 <sup>f</sup>  | H  | Br                    | 5 mol % CuCN                                    | 6 mol % L15    | 67:33              | 54:46                |
| 5 <sup>g</sup>  | H  | Br                    | 5 mol % CuCN                                    | 6 mol % L15    | 33:67              | 70:30                |
| 6               | H  | Br                    | 5 mol % CuTc                                    | 6 mol % L15    | 80:20              | 96:4                 |
| 7               | H  | Br                    | 5 mol % [Cu(CNMe) <sub>4</sub> ]PF <sub>6</sub> | 6 mol % L15    | 70:30              | 94:6                 |
| 8               | H  | Br                    | 5 mol % CuCl                                    | 6 mol % L15    | 76:24              | 93:7                 |
| 9               | H  | Br                    | 5 mol % CuBr                                    | 6 mol % L15    | 71:29              | 93:7                 |
| 10              | H  | Br                    | 5 mol % CuBr·SMe <sub>2</sub>                   | 6 mol % L15    | 83:17              | 81:19                |
| 11              | H  | Br                    | 5 mol % CuI                                     | 6 mol % L15    | 80:20              | 94:6                 |
| 12 <sup>h</sup> | H  | Br                    | 5 mol % CuTc                                    | 6 mol % L15    | 74:26              | 93:7                 |
| 13 <sup>i</sup> | H  | Br                    | 5 mol % CuTc                                    | 6 mol % L15    | 71:29              | 86:14                |
| 14              | H  | Br                    | 2.5 mol % CuTc                                  | 3 mol % L15    | 80:20              | 96:4                 |
| 15              | H  | Br                    | 1 mol % CuTc                                    | 1.2 mol % L15  | 82:18              | 95:5                 |
| 16              | H  | Br                    | 0.5 mol % CuTc                                  | 0.6 mol % L15  | 85:15              | 97:3                 |
| 17              | H  | Br                    | 0.1 mol % CuTc                                  | 0.12 mol % L15 | 60:40              | 96:4                 |
| 18              | H  | Cl                    | 0.5 mol % CuTc                                  | 0.6 mol % L15  | 40:60              | 77:23                |
| 19              | H  | Cl                    | 0.5 mol % CuCN                                  | 0.6 mol % L15  | 88:12              | 61:39                |
| 20              | Me | Br                    | 5 mol % CuCN                                    | 6 mol % L15    | 74:26              | 68:32                |
| 21              | Me | Br                    | 5 mol % CuTc                                    | 6 mol % L15    | 74:26              | 95:5                 |
| 22              | Me | Br                    | 2.5 mol % CuTc                                  | 3 mol % L15    | 67:33              | 82:18                |
| 23              | Me | Br                    | 1 mol % CuTc                                    | 1.2 mol % L15  | 69:31              | 79:21                |
| 24 <sup>j</sup> | Me | OAc                   | 5 mol % CuTc                                    | 6 mol % L15    | --                 | --                   |
| 25              | Me | OCbz                  | 5 mol % CuTc                                    | 6 mol % L15    | 14:86              | 42:58                |
| 26              | Me | OPO(OMe) <sub>2</sub> | 5 mol % CuTc                                    | 6 mol % L15    | 25:75              | 44:56                |

<sup>a</sup>Unless otherwise specified, the reactions were performed under nitrogen in DCM at −78 °C in the presence of [Cu] and L15 with allyl bromide and EtMgBr (3 M solution in diethyl ether, 2.0 equiv). Slow addition of EtMgBr over 0.5 h. <sup>b</sup>All reactions gave full conversion. The ratios of 3a/4a were determined by <sup>1</sup>H NMR spectroscopy. <sup>c</sup>The *er* values of 3a were determined by chiral HPLC analysis. <sup>d</sup>The reaction was performed in Et<sub>2</sub>O. <sup>e</sup>The reaction was performed in MTBE. <sup>f</sup>The reaction was performed in THF. <sup>g</sup>EtMgBr (1 M solution in THF). <sup>h</sup>The reaction was performed at −40 °C. <sup>i</sup>The reaction was performed at −10 °C. <sup>j</sup>No reaction.

## 5. X-Ray Crystal Data of Copper Complex

CD 1906544 contain the supplementary crystallographic data for this paper. These data can be obtained free of charge via [www.ccdc.cam.ac.uk/conts/retrieving.html](http://www.ccdc.cam.ac.uk/conts/retrieving.html) (or from the Cambridge Crystallographic Data Centre, 12 Union Road, Cambridge CB21EZ, UK; fax: (+44)1223-336-033; or [deposit@ccdc.cam.ac.uk](mailto:deposit@ccdc.cam.ac.uk)).

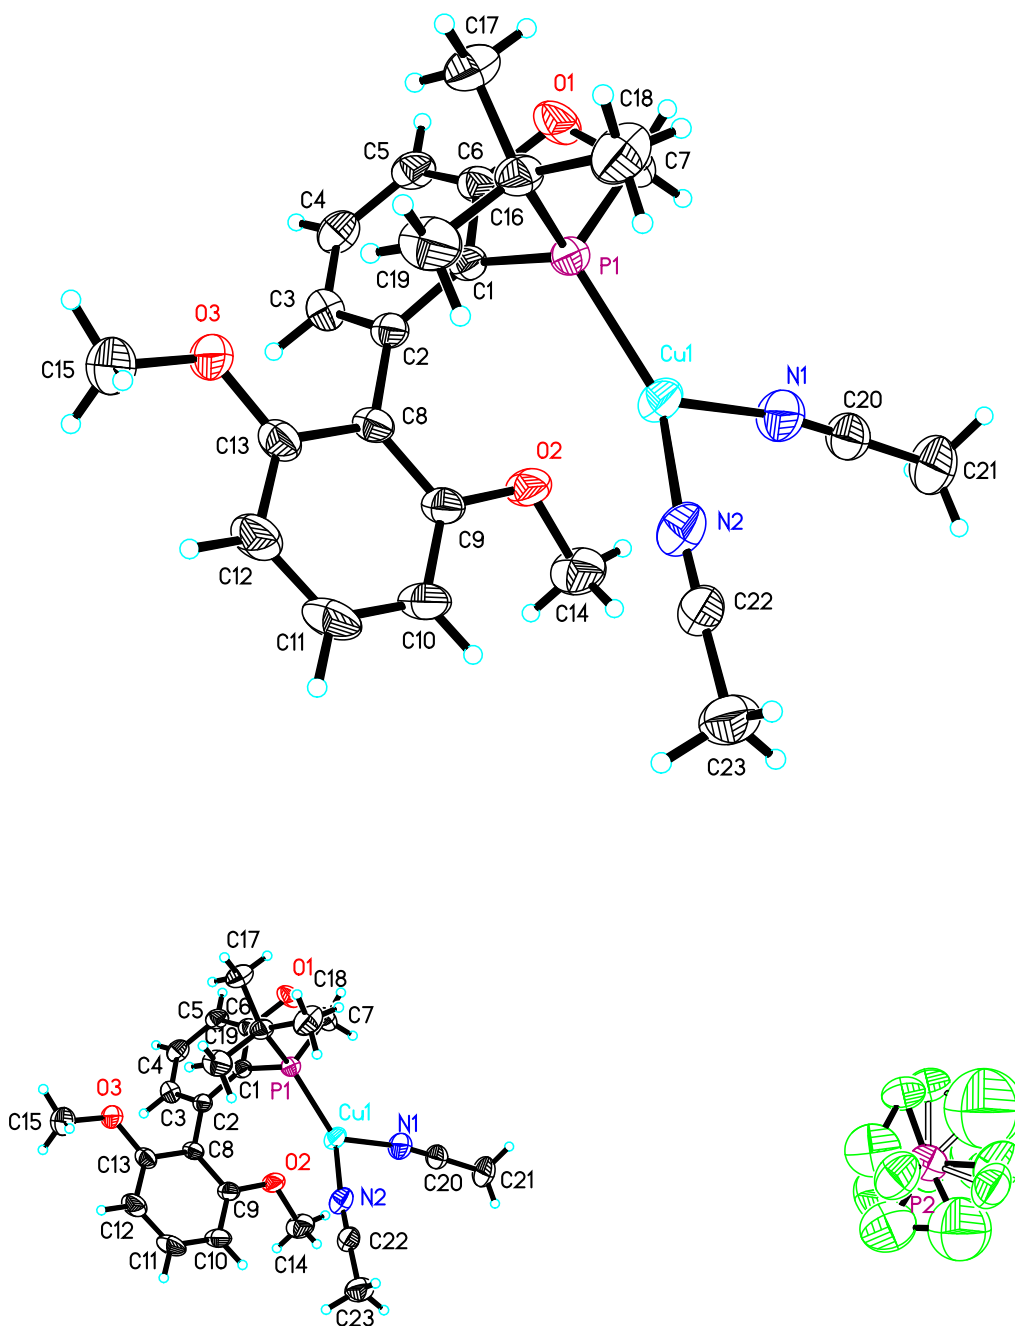

Crystal data and structure refinement for mo\_d8v17470\_0m.

|                                   |                                                                                                |
|-----------------------------------|------------------------------------------------------------------------------------------------|
| Identification code               | mo_d8v17470_0m                                                                                 |
| Empirical formula                 | C <sub>23</sub> H <sub>29</sub> Cu F <sub>6</sub> N <sub>2</sub> O <sub>3</sub> P <sub>2</sub> |
| Formula weight                    | 620.96                                                                                         |
| Temperature                       | 296(2) K                                                                                       |
| Wavelength                        | 0.71073 Å                                                                                      |
| Crystal system                    | Orthorhombic                                                                                   |
| Space group                       | P 21 21 21                                                                                     |
| Unit cell dimensions              | a = 8.5246(2) Å = 90°.<br>b = 10.5054(3) Å = 90°.<br>c = 30.1709(7) Å = 90°.                   |
| Volume                            | 2701.93(12) Å <sup>3</sup>                                                                     |
| Z                                 | 4                                                                                              |
| Density (calculated)              | 1.527 Mg/m <sup>3</sup>                                                                        |
| Absorption coefficient            | 0.996 mm <sup>-1</sup>                                                                         |
| F(000)                            | 1272                                                                                           |
| Crystal size                      | 0.200 x 0.160 x 0.130 mm <sup>3</sup>                                                          |
| Theta range for data collection   | 2.053 to 25.499°.                                                                              |
| Index ranges                      | -9<=h<=10, -12<=k<=8, -33<=l<=36                                                               |
| Reflections collected             | 14429                                                                                          |
| Independent reflections           | 4984 [R(int) = 0.0255]                                                                         |
| Completeness to theta = 25.242°   | 99.0 %                                                                                         |
| Absorption correction             | Semi-empirical from equivalents                                                                |
| Max. and min. transmission        | 0.7456 and 0.5766                                                                              |
| Refinement method                 | Full-matrix least-squares on F <sup>2</sup>                                                    |
| Data / restraints / parameters    | 4984 / 64 / 386                                                                                |
| Goodness-of-fit on F <sup>2</sup> | 1.078                                                                                          |
| Final R indices [I>2sigma(I)]     | R1 = 0.0440, wR2 = 0.1179                                                                      |
| R indices (all data)              | R1 = 0.0523, wR2 = 0.1261                                                                      |
| Absolute structure parameter      | -0.004(6)                                                                                      |
| Extinction coefficient            | 0.018(3)                                                                                       |
| Largest diff. peak and hole       | 0.258 and -0.602 e.                                                                            |

## 6. References

- (1) (a) Metternich, J. B.; Gilmour, R. A Bio-Inspired, Catalytic  $E \rightarrow Z$  Isomerization of Activated Olefins. *J. Am. Chem. Soc.* **2015**, *137*, 11254–11257. (b) Simard-Mercier, J.; Jiang, J. L.; Ho, M. L.; Flynn, A. B.; Ogilvie, W. W. Single-Isomer Trisubstituted Olefins from a Novel Reaction of ( $E$ )- $\beta$ -Chloro- $\alpha$ -Iodo- $\alpha$ ,  $\beta$ -Unsaturated Esters and Amides. *J. Org. Chem.* **2008**, *73*, 5899–5906. (c) Kalkhambkar, R. G.; Laali, K. K. Arenediazonium Salts Immobilized in Imidazolium Ionic Liquids as Electrophilic Partners in the Pd(OAc)<sub>2</sub>-Catalyzed Matsuda-Heck Arylation. *Tetrahedron Lett.* **2011**, *52*, 1733–1737. (d) Felluga, F.; Ghelfi, F.; Pitacco, G.; Roncaglia, F.; Valentin, E.; Venneri, C. D. Esterase-Mediated Synthesis of Optically Active GABA Analogues Containing a Stereogenic All-Carbon Quaternary Carbon Atom. *Tetrahedron: Asymmetry* **2010**, *21*, 2183–2191. (e) Dyker, G.; Grundt, P. Synthesis of Functionalized 4a-Methyl-1, 2, 3, 4, 4a, 9, 10, 10a-octahydrophenanthrenes. *Helv. Chim. Acta*, **1999**, *82*, 588–596. (f) Shevlin, M.; Friedfeld, M. R.; Sheng, H.-M.; Pierson, N. A.; Hoyt, J. M.; Campeau, L. C.; Chirik, P. J. Nickel-Catalyzed Asymmetric Alkene Hydrogenation of  $\alpha$ ,  $\beta$ -Unsaturated Esters: High-Throughput Experimentation-Enabled Reaction Discovery, Optimization, and Mechanistic Elucidation. *J. Am. Chem. Soc.* **2016**, *138*, 3562–3569. (g) Li, J.-Q.; Quan, X.; Andersson, P. G. Highly Enantioselective Iridium-Catalyzed Hydrogenation of  $\alpha$ ,  $\beta$ -Unsaturated Esters. *Chem. Eur. J.* **2012**, *18*, 10609–10616.
- (2) Bernasconi, M.; Ramella, V.; Tosatti, P.; Pfaltz, A. Iridium-Catalyzed Asymmetric Hydrogenation of 3, 3-Disubstituted Allylic Alcohols in Ethereal Solvents. *Chem. Eur. J.* **2014**, *20*, 2440–2444.
- (3) (a) van Zijl, A. W.; Arnold, L. A.; Minnaard, A. J.; Feringa, B. L. Highly Enantioselective Copper-Catalyzed Allylic Alkylation with Phosphoramidite Ligands. *Adv. Synth. Catal.* **2004**, *346*, 413–420. (b) Fañanás-Mastral, M.; Pérez, M.; Bos, P. H.; Rudolph, A.; Harutyunyan, S. R.; Feringa, B. L. Enantioselective Synthesis of Tertiary and Quaternary Stereogenic Centers: Copper/Phosphoramidite-Catalyzed Allylic Alkylation with Organolithium Reagents. *Angew. Chem. Int. Ed.* **2012**, *51*, 1922–1925. (c) Reichl, K. D.; Dunn, N. L.; Fastuca, N. J.; Radosevich, A. T. Biphilic Organophosphorus Catalysis: Regioselective Reductive Transposition of Allylic Bromides via P<sup>III</sup>/P<sup>V</sup> Redox Cycling. *J. Am. Chem. Soc.* **2015**, *137*, 5292–5295. (d) Fañanás-Mastral, M.; Vitale, R.; Pérez, M.; Feringa, B. L. Enantioselective Synthesis of All-Carbon Quaternary Stereogenic Centers via Copper-Catalyzed Asymmetric Allylic Alkylation of ( $Z$ )-Allyl Bromides with Organolithium Reagents. *Chem. Eur. J.* **2015**, *21*, 4209–4212. (e) Guduguntla, S.; Gualtierotti, J. B.; Goh, S. S.; Feringa, B. L. Enantioselective Synthesis of Di- and Tri-Arylated All-Carbon Quaternary Stereocenters via Copper-Catalyzed Allylic Arylations with Organolithium Compounds. *ACS Catal.* **2016**, *6*, 6591–6595. (f) Nguyen, T. N. T.; Thiela, N. O.; Teichert, J. F. Copper(I)-catalysed Asymmetric Allylic Reductions with Hydrosilanes. *Chem. Commun.* **2017**, *53*, 11686–11689.
- (4) (a) Tang, W.; Qu, B.; Capacci, A. G.; Rodriguez, S.; Wei, X.; Haddad, N.; Narayanan, B.; Ma, S.; Grinberg, N.; Yee, N. K.; Krishnamurthy, D.; Senanayake, C. H. Novel, Tunable, and Efficient Chiral Bisdihydrobenzoxaphosphole Ligands for Asymmetric Hydrogenation. *Org. Lett.* **2010**, *12*, 176–179. (b) Tang, W.; Patel, N. D.; Xu, G.; Xu, X.; Savoie, J.; Ma, S.; Hao, M.-H.; Keshipeddy, S.; Capacci, A. G.; Wei, X.; Zhang, Y.; Gao, J. J.; Li, W.; Rodriguez, S.; Lu, B. Z.; Yee, N. K.; Senanayake, C. H. Efficient Chiral Monophosphorus Ligands for Asymmetric Suzuki-Miyaura Coupling Reactions. *Org. Lett.* **2012**, *14*, 2258–2261. (c) Tang, W.; Capacci, A. G.; Wei, X.; Li, W.; White, A.; Patel, N. D.; Savoie, J.; Gao, J. J.; Rodriguez, S.; Qu, B.; Haddad, N.; Lu, B. Z.; Krishnamurthy, D.; Yee, N. K.; Senanayake, C. H. A General and Special Catalyst for Suzuki-Miyaura Coupling Processes. *Angew. Chem. Int. Ed.* **2010**, *49*, 5879–5883.

- (5) (a) Tang, W.; Keshipeddy, S.; Zhang, Y.; Wei, X.; Savoie, J.; Patel, N. D.; Yee, N. K.; Senanayake, C. H. Efficient Monophosphorus Ligands for Palladium-Catalyzed Miyaura Borylation. *Org. Lett.* **2011**, *13*, 1366–1369. (b) Zhao, Q.; Li, C.; Senanayake, C. H.; Tang, W. An Efficient Method for Sterically Demanding Suzuki-Miyaura Coupling Reactions. *Chem. Eur. J.* **2013**, *19*, 2261–2265. (c) Xu, G.; Fu, W.; Liu, G.; Senanayake, C. H.; Tang, W. Efficient Syntheses of Korupensamines A, B and Michellamine B by Asymmetric Suzuki-Miyaura Coupling Reactions. *J. Am. Chem. Soc.* **2013**, *136*, 570–573.
- (6) (a) Haddad, N.; Mangunuru, H. P. R.; Fandrick, K. R.; Qu, B.; Sieber, J. D.; Rodriguez, S.; Desrosiers, J. N.; Patel, N. D.; Lee, H.; Kurouski, D.; Grinberg, N.; Yee, N. K.; Song, J.-H. J.; Senanayake, C. H. Reengineered BIDIME Ligand Core Based on Computer Modeling to Increase Selectivity in Asymmetric Suzuki-Miyaura Coupling for the Challenging Axially Chiral HIV Integrase Inhibitor. *Adv. Synth. Catal.* **2016**, *358*, 3522–3527. (b) Patel, N. D.; Sieber, J. D.; Tcyrulnikov, S.; Simmons, B. J.; Rivalti, D.; Duvvuri, K.; Zhang, Y.; Gao, D.-H. A.; Fandrick, K. R.; Haddad, N.; Lao, K. S.; Mangunuru, H. P.; Biswas, R. S.; Qu, B.; Grinberg, N.; Pennino, S.; Lee, H.; Song, J.-H. J.; Gupton, B. F.; Garg, N. K.; Kozłowski, M. C.; Senanayake, C. H. Computationally Assisted Mechanistic Investigation and Development of Pd-Catalyzed Asymmetric Suzuki-Miyaura and Negishi Cross-Coupling Reactions for Tetra-*ortho*-Substituted Biaryl Synthesis. *ACS Catal.* **2018**, *8*, 10190–10209.

## 7. NMR Spectra and HPLC chromatographs

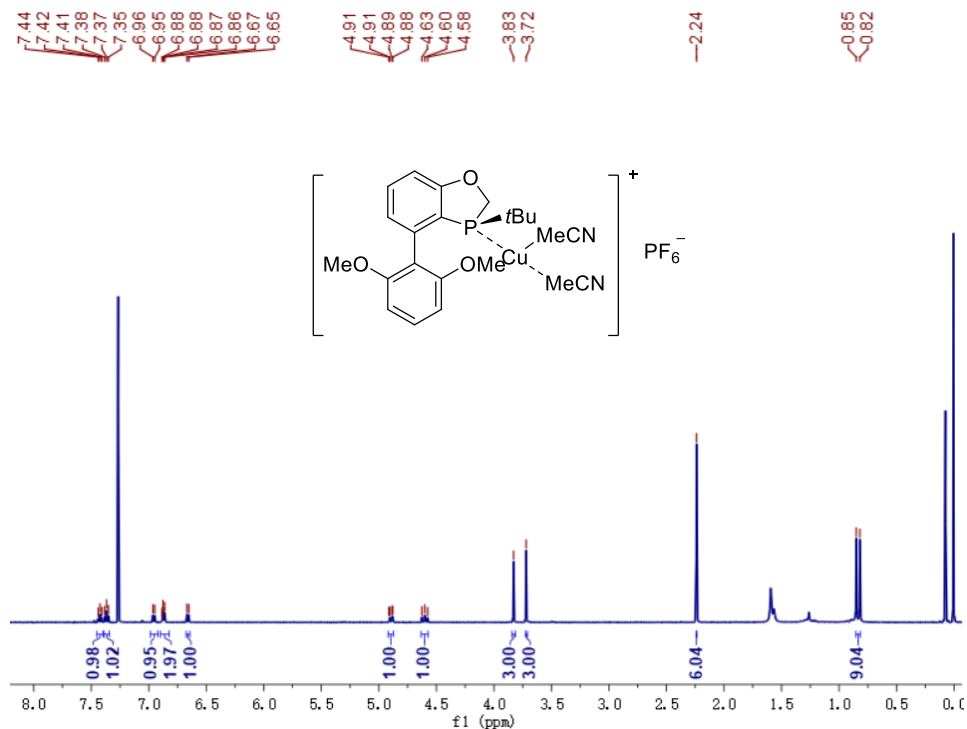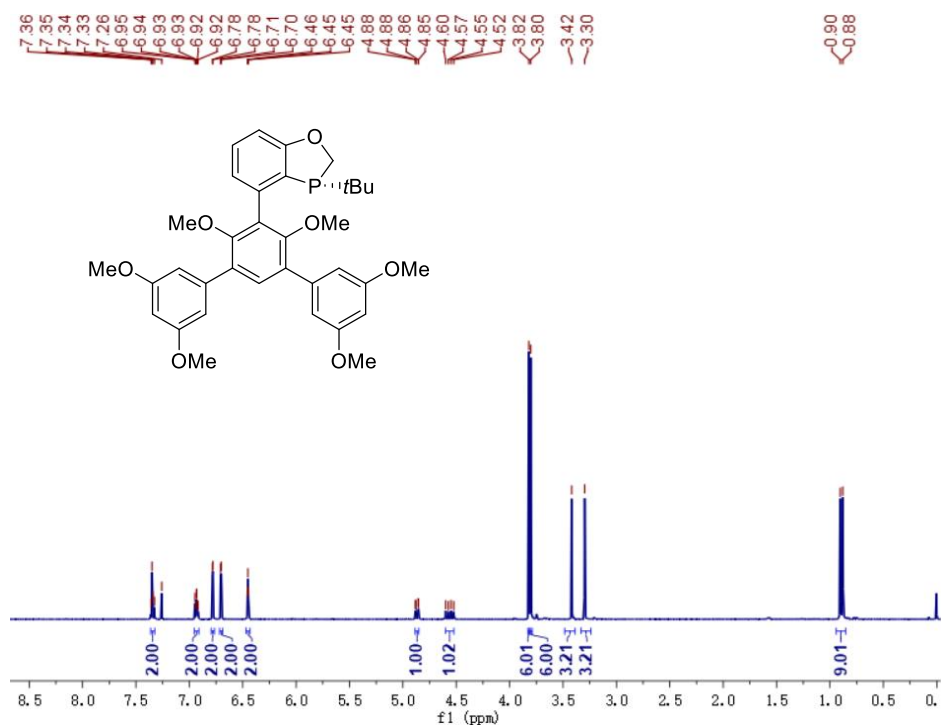

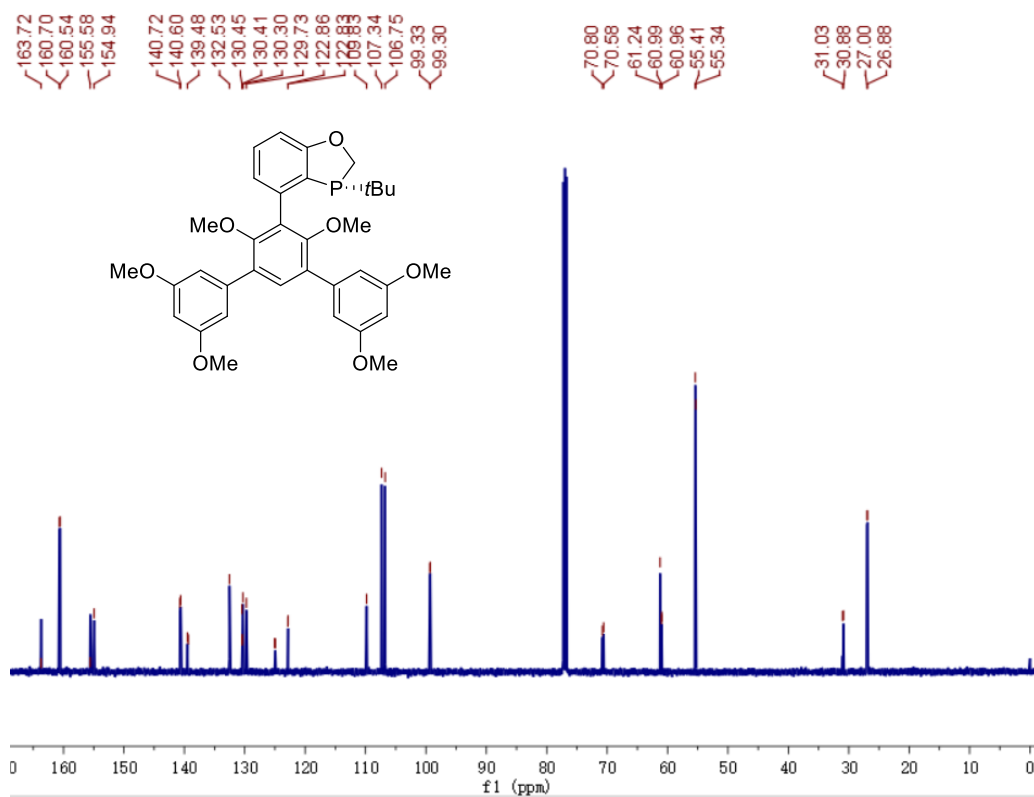

**Figure S3:** <sup>13</sup>C NMR (126 MHz, CDCl<sub>3</sub>) spectrum of **L15**

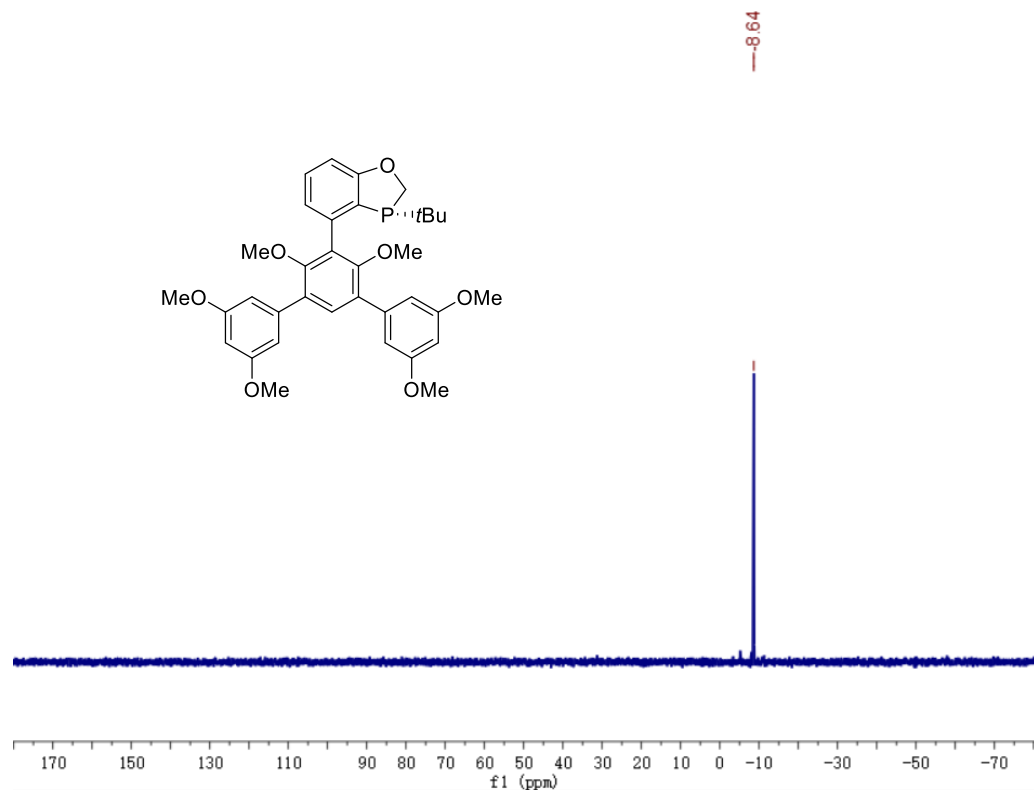

**Figure S4:** <sup>31</sup>P NMR (162 MHz, CDCl<sub>3</sub>) spectrum of **L15**



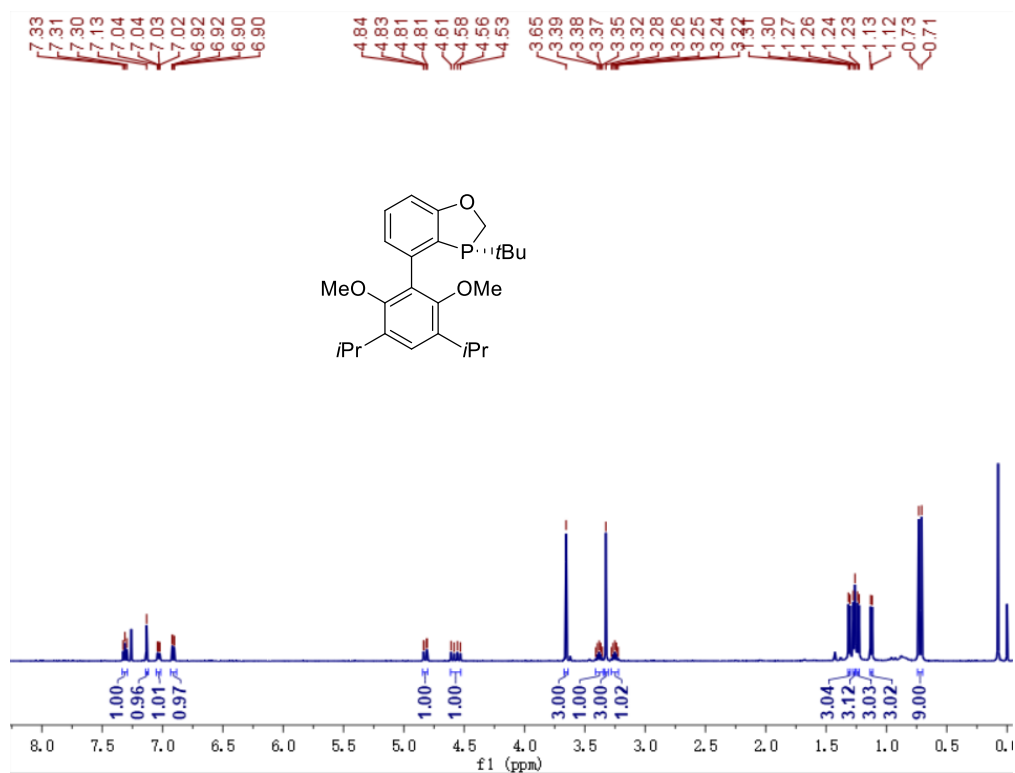

**Figure S5:** <sup>1</sup>H NMR (500 MHz, CDCl<sub>3</sub>) spectrum of **L7**

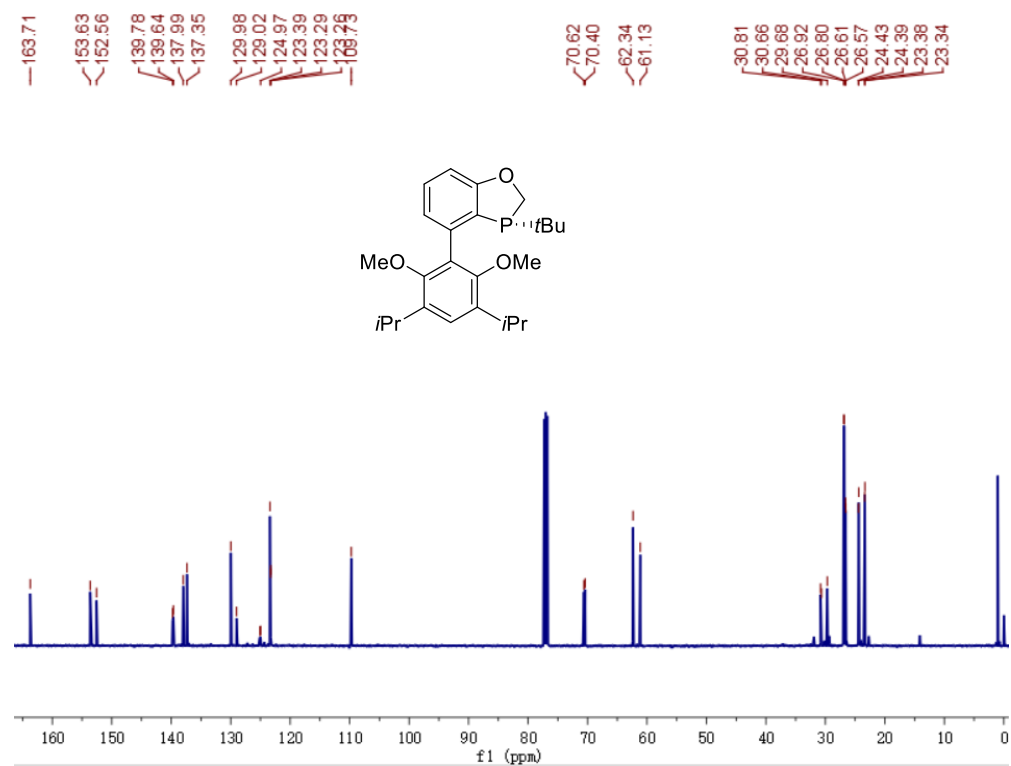

**Figure S6:** <sup>13</sup>C NMR (126 MHz, CDCl<sub>3</sub>) spectrum of **L7**



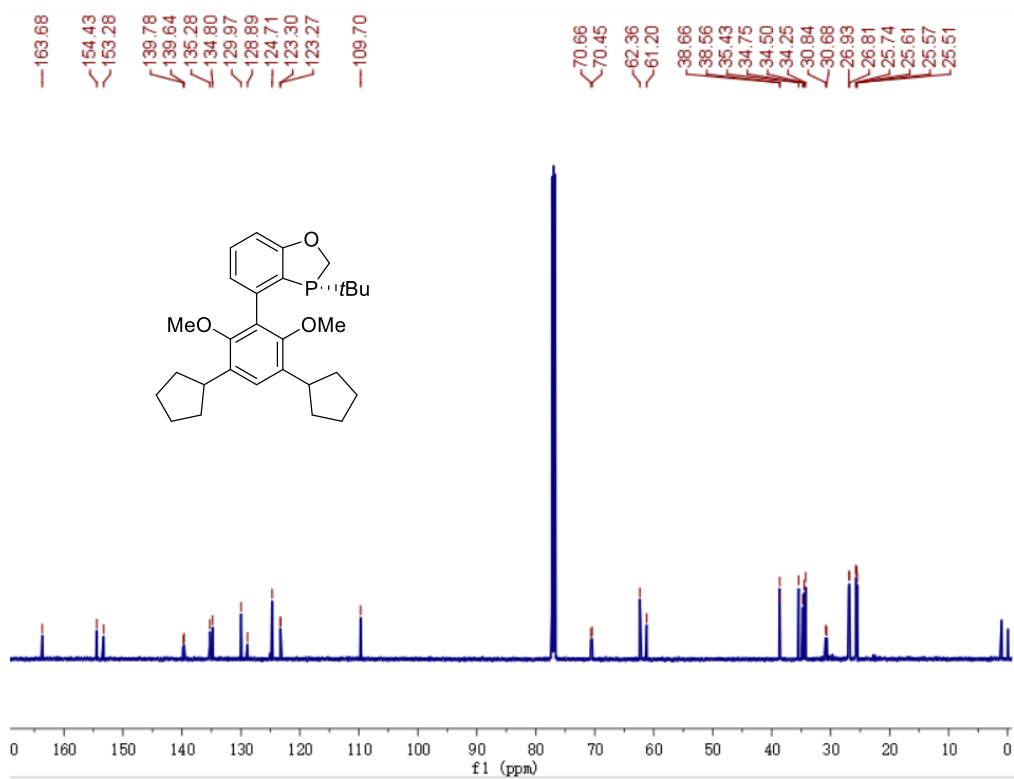

**Figure S9:** <sup>13</sup>C NMR (126 MHz, CDCl<sub>3</sub>) spectrum of **L8**

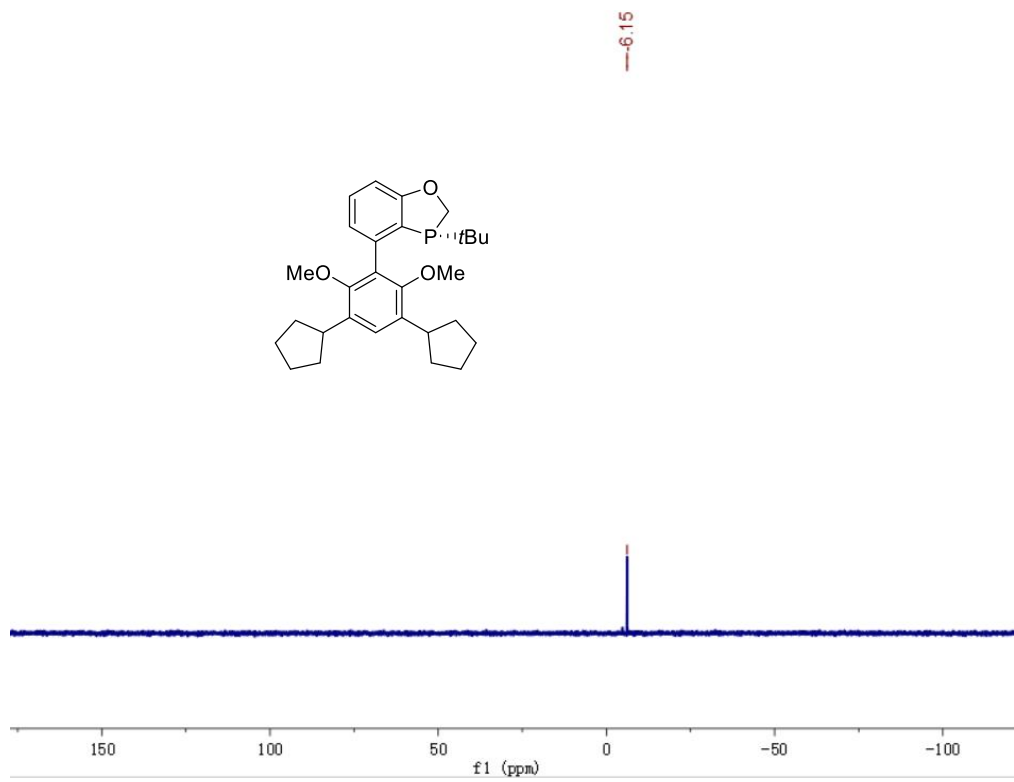

**Figure S10:** <sup>31</sup>P NMR (162 MHz, CDCl<sub>3</sub>) spectrum of **L8**

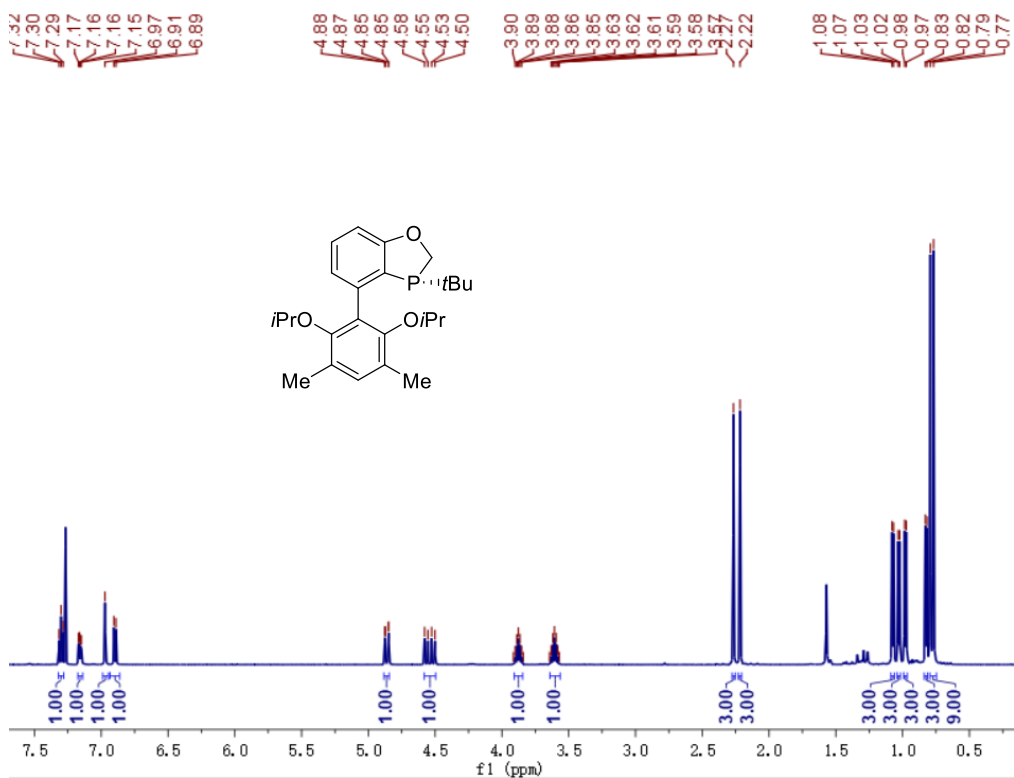

Figure S11: <sup>1</sup>H NMR (500 MHz, CDCl<sub>3</sub>) spectrum of L10

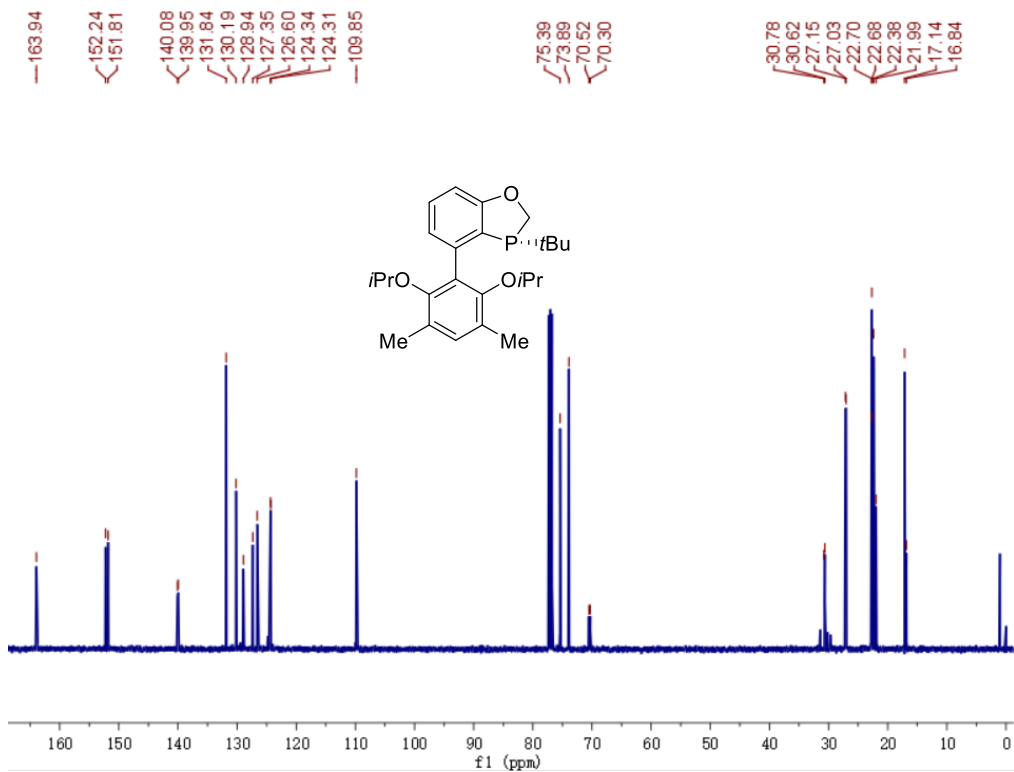

Figure S12: <sup>13</sup>C NMR (126 MHz, CDCl<sub>3</sub>) spectrum of L10

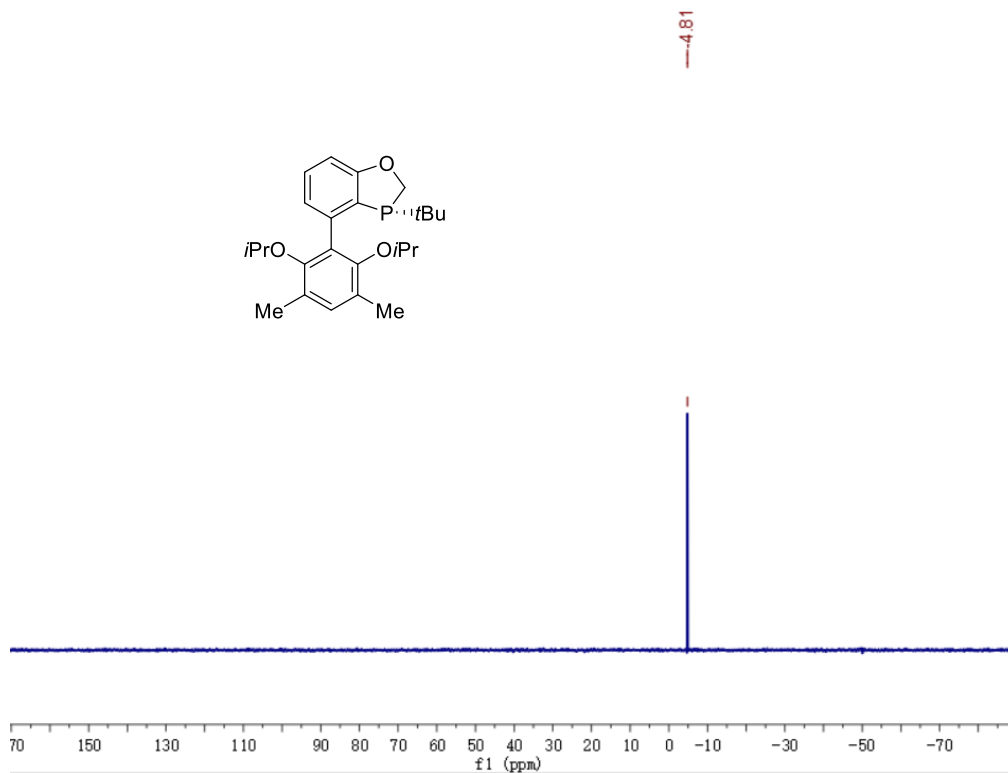

**Figure S13:** <sup>31</sup>P NMR (162 MHz, CDCl<sub>3</sub>) spectrum of **L10**

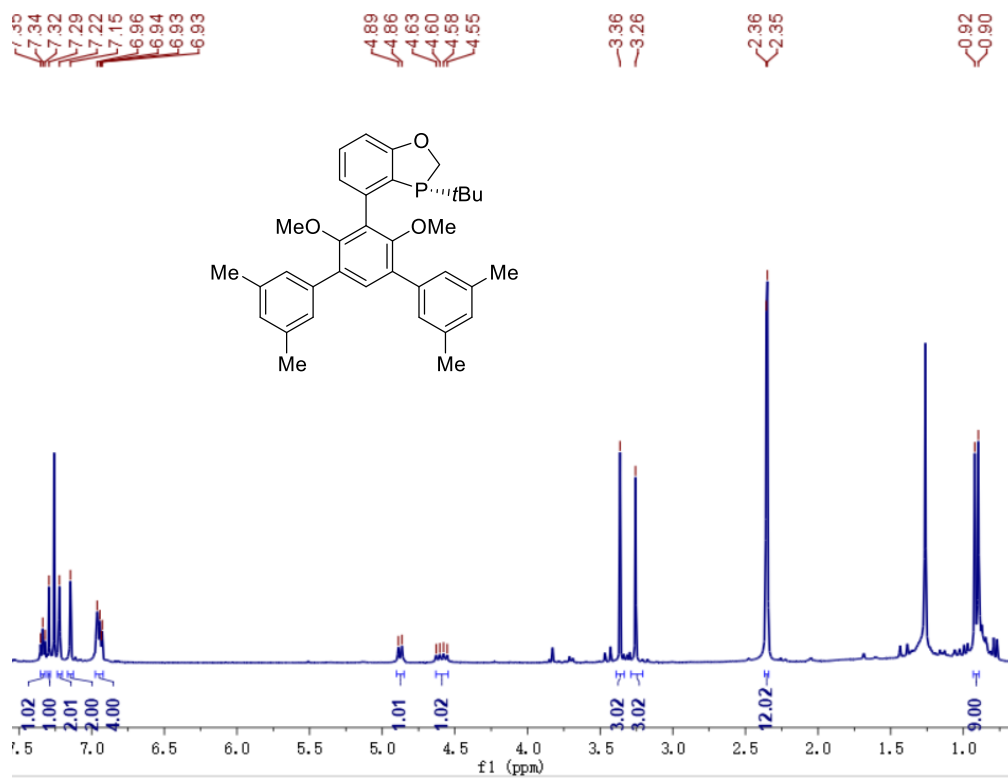

**Figure S14:** <sup>1</sup>H NMR (500 MHz, CDCl<sub>3</sub>) spectrum of **L12**

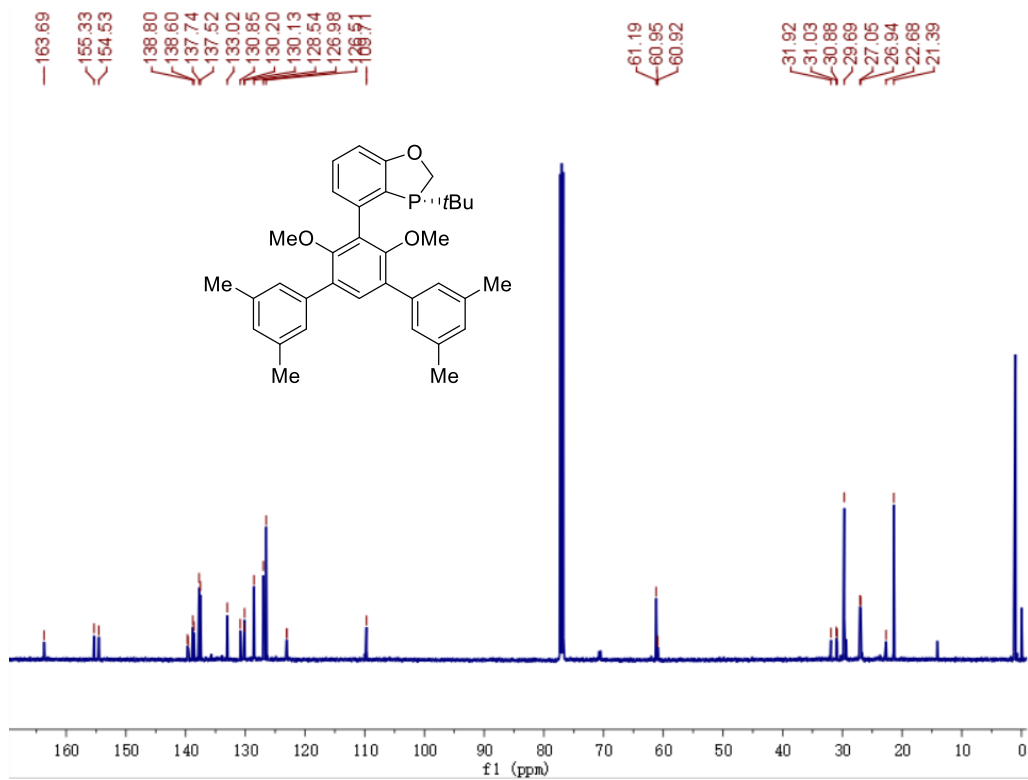

**Figure S15:** <sup>13</sup>C NMR (126 MHz, CDCl<sub>3</sub>) spectrum of **L12**

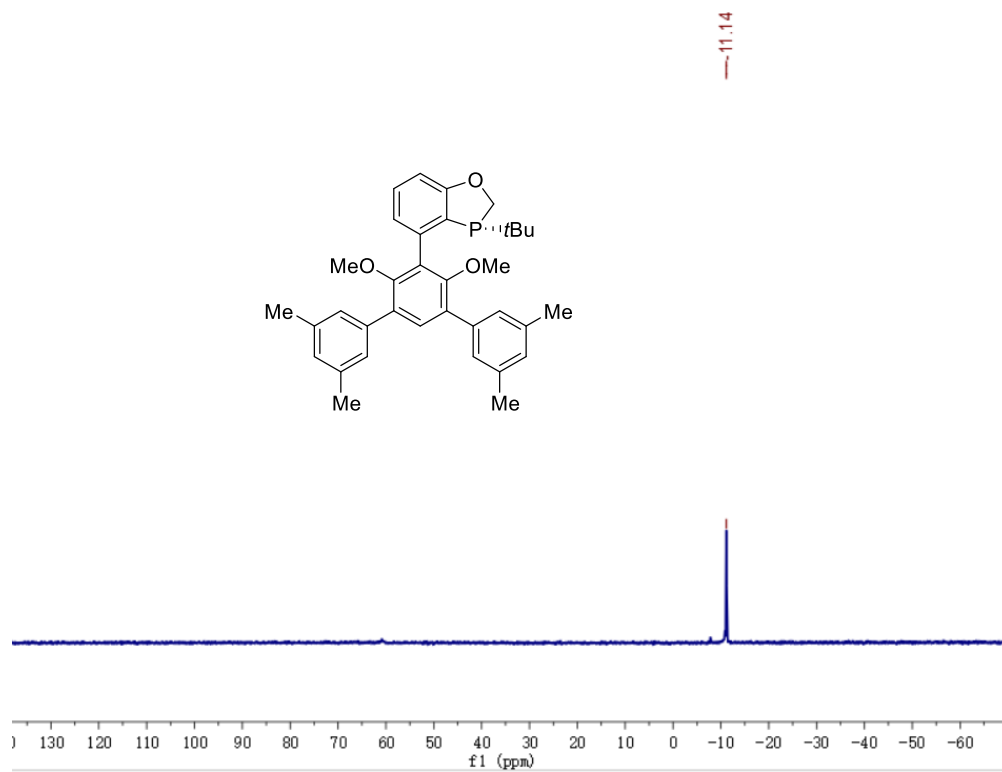

**Figure S16:** <sup>31</sup>P NMR (121 MHz, CDCl<sub>3</sub>) spectrum of **L12**

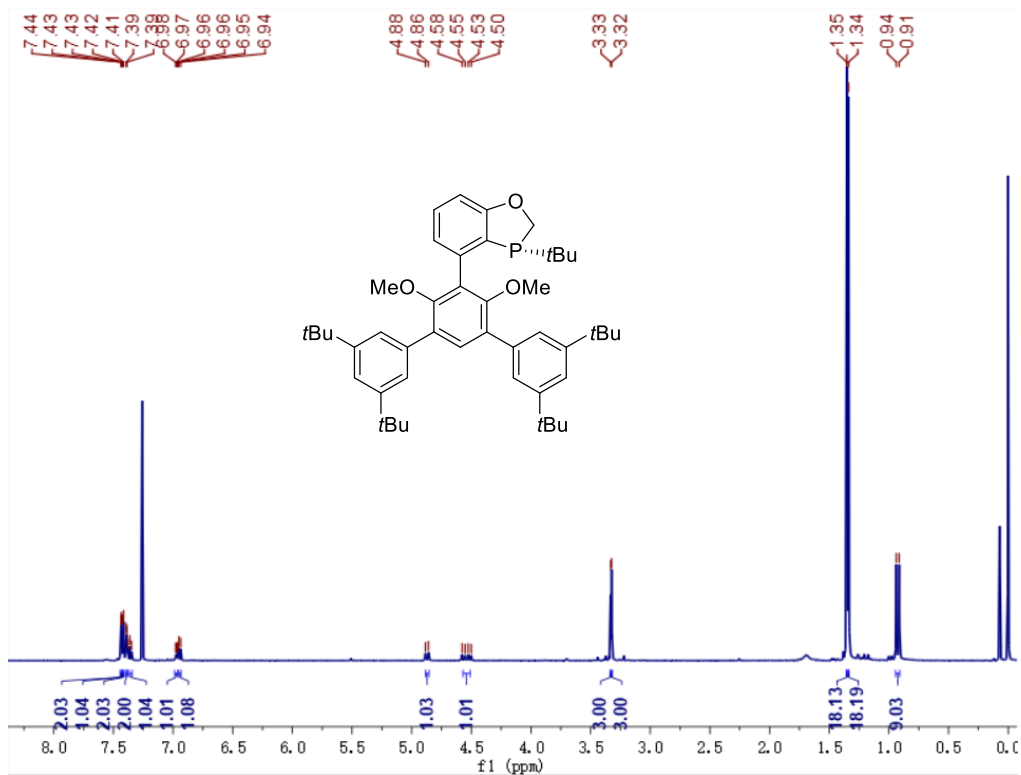

**Figure S17:** <sup>1</sup>H NMR (500 MHz, CDCl<sub>3</sub>) spectrum of **L13**

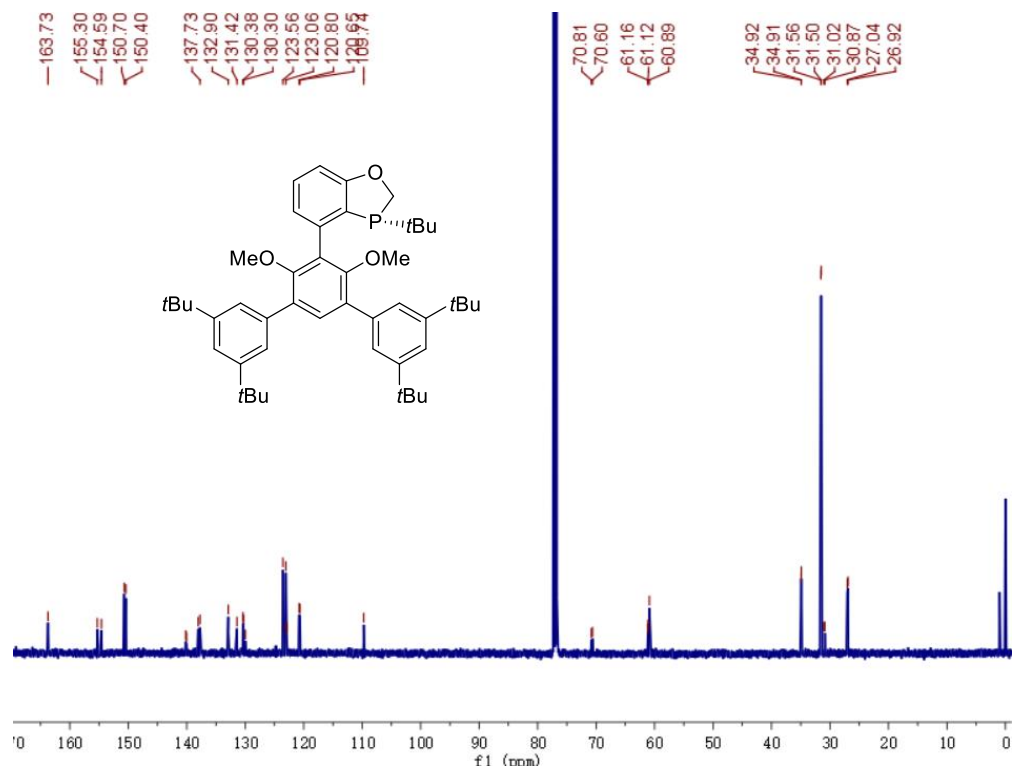

**Figure S18:** <sup>13</sup>C NMR (126 MHz, CDCl<sub>3</sub>) spectrum of **L13**

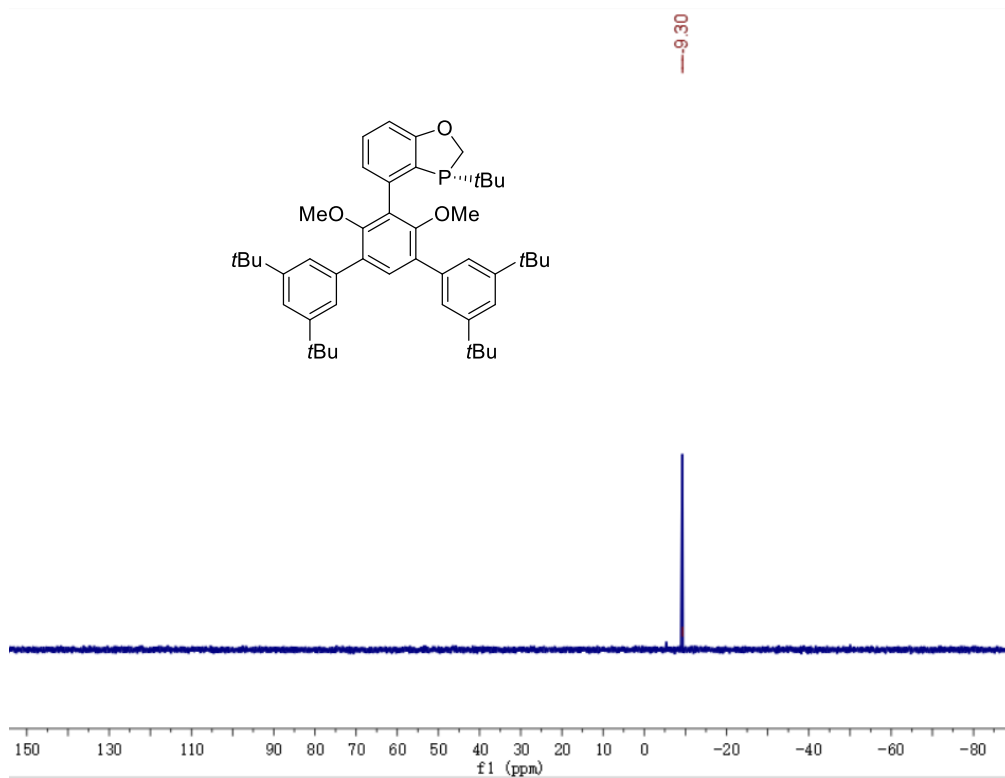

**Figure S19:** <sup>31</sup>P NMR (162 MHz, CDCl<sub>3</sub>) spectrum of **L13**

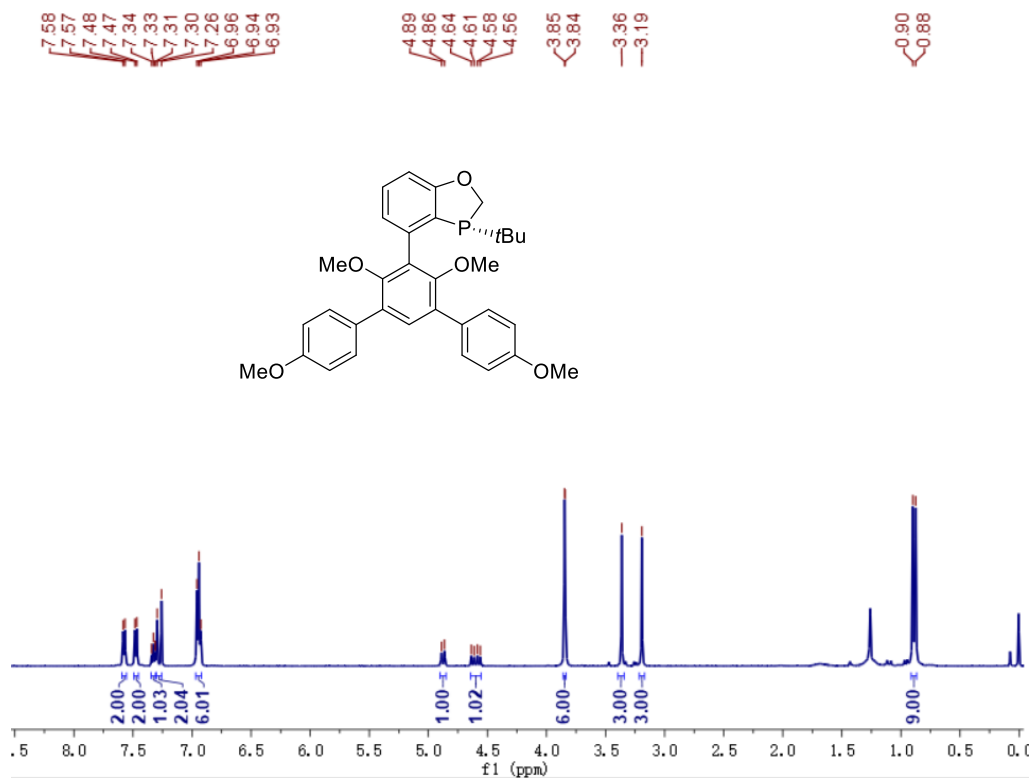

**Figure S20:** <sup>1</sup>H NMR (500 MHz, CDCl<sub>3</sub>) spectrum of **L16**



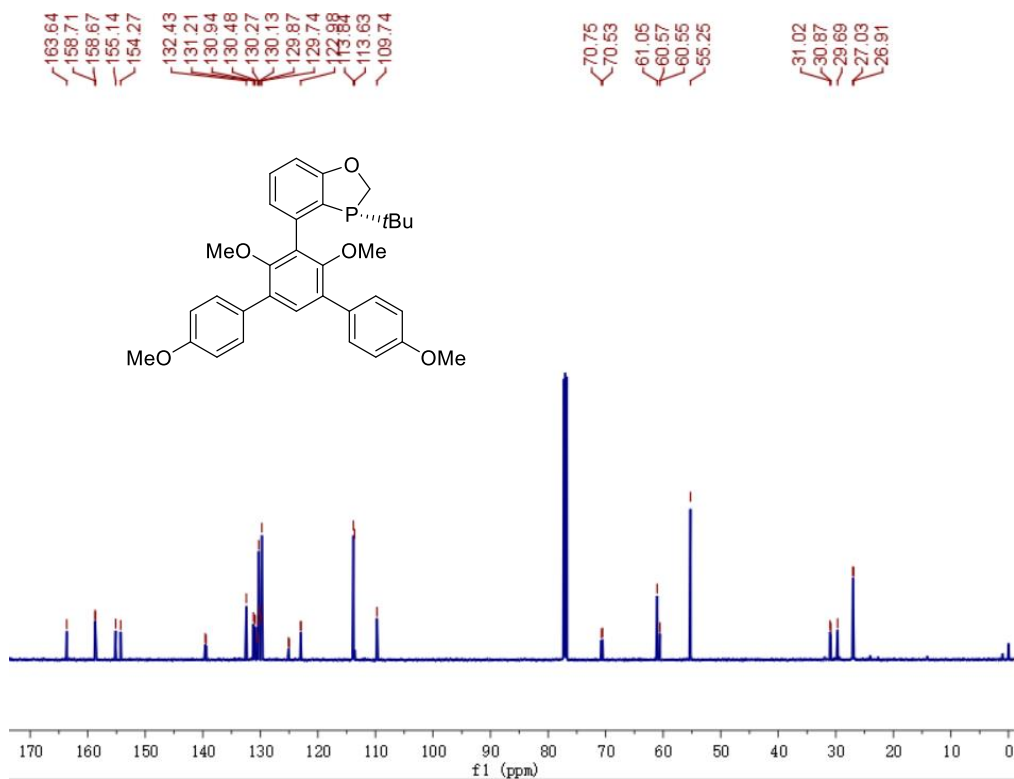

**Figure S21:**  $^{13}\text{C}$  NMR (126 MHz,  $\text{CDCl}_3$ ) spectrum of **L16**

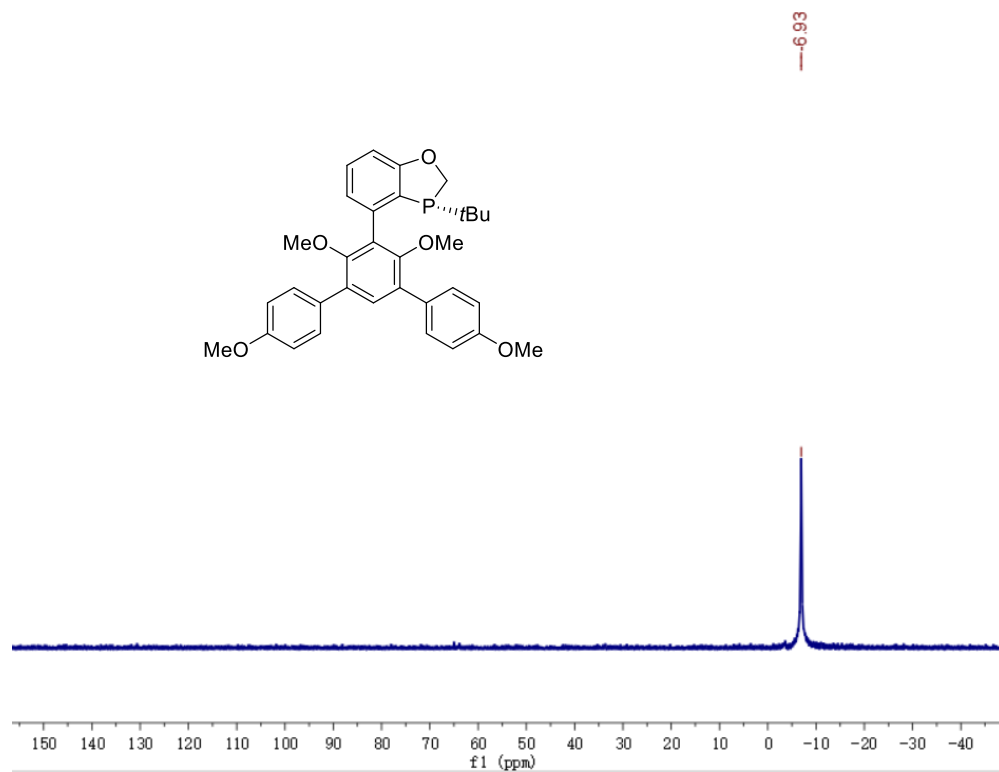

**Figure S22:**  $^{31}\text{P}$  NMR (121 MHz,  $\text{CDCl}_3$ ) spectrum of **L16**







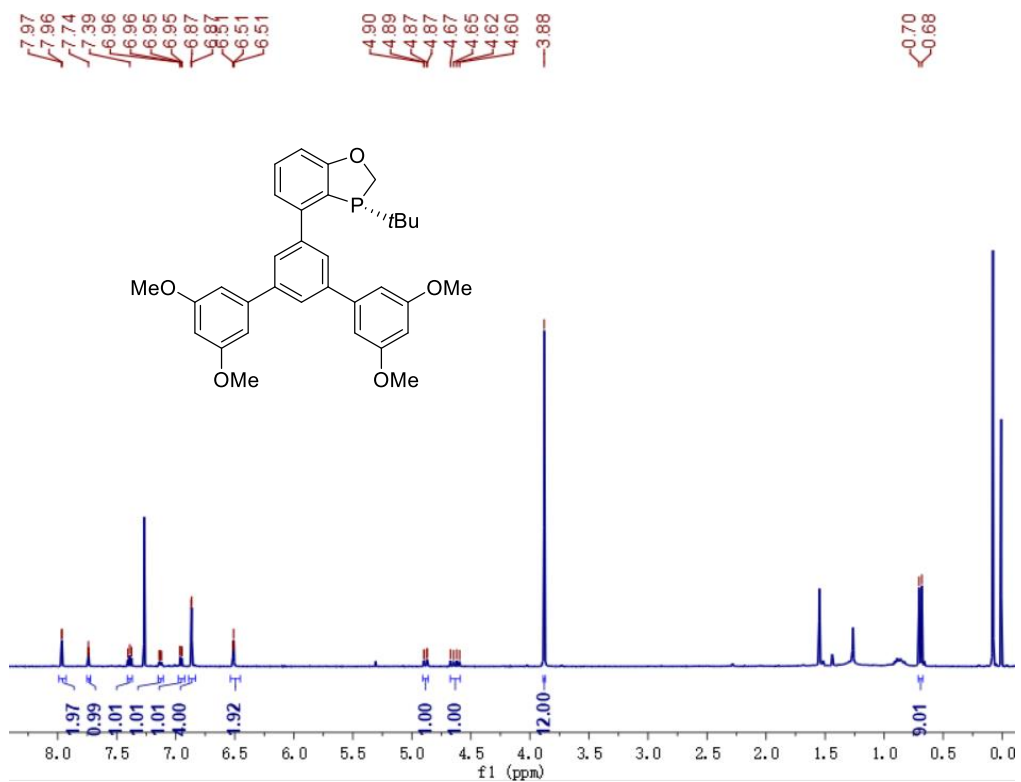

**Figure S29:** <sup>1</sup>H NMR (500 MHz, CDCl<sub>3</sub>) spectrum of **L19**

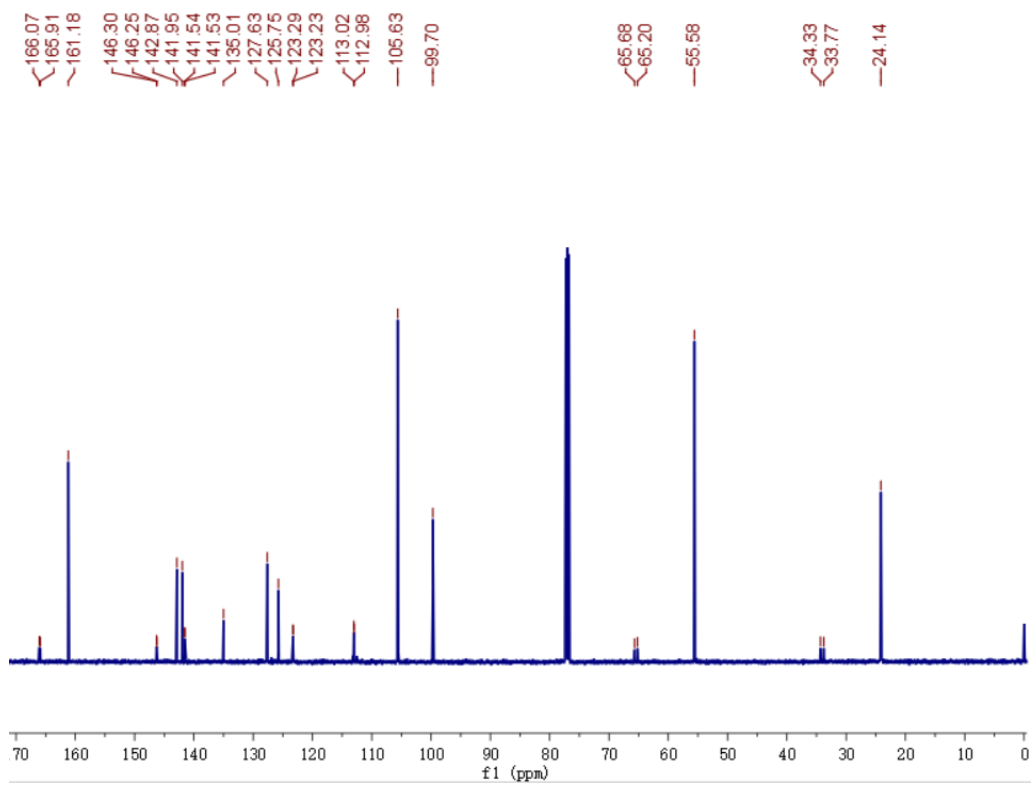

**Figure S30:** <sup>13</sup>C NMR (126 MHz, CDCl<sub>3</sub>) spectrum of **L19**

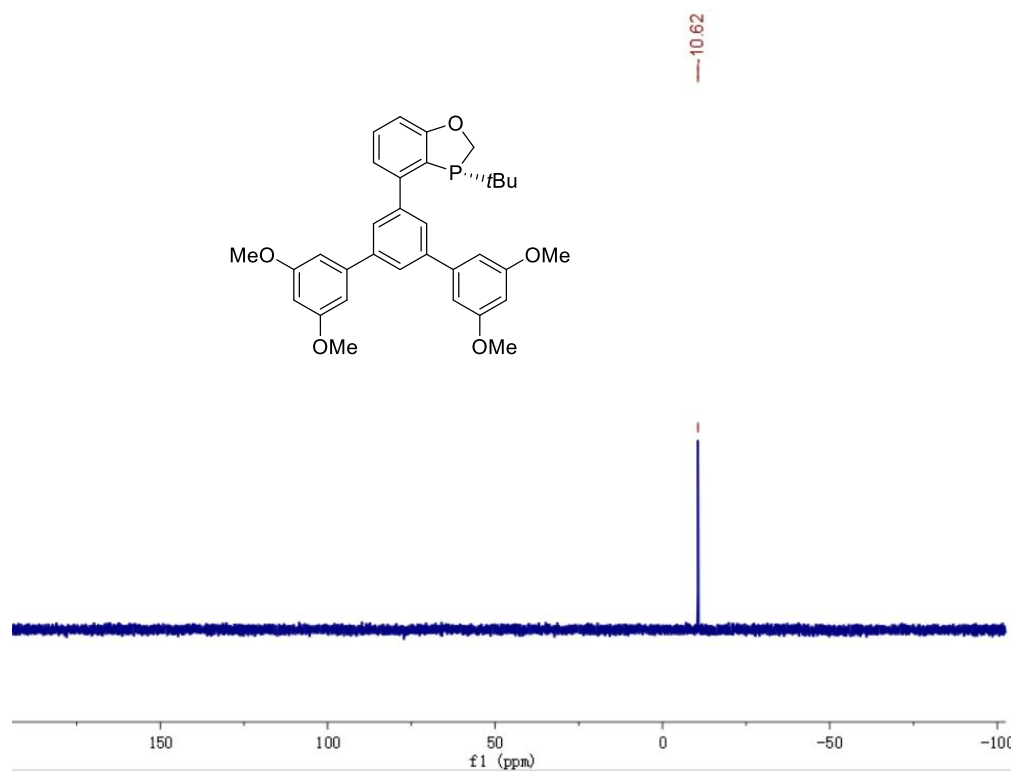

**Figure S31:** <sup>31</sup>P NMR (162 MHz, CDCl<sub>3</sub>) spectrum of **L19**

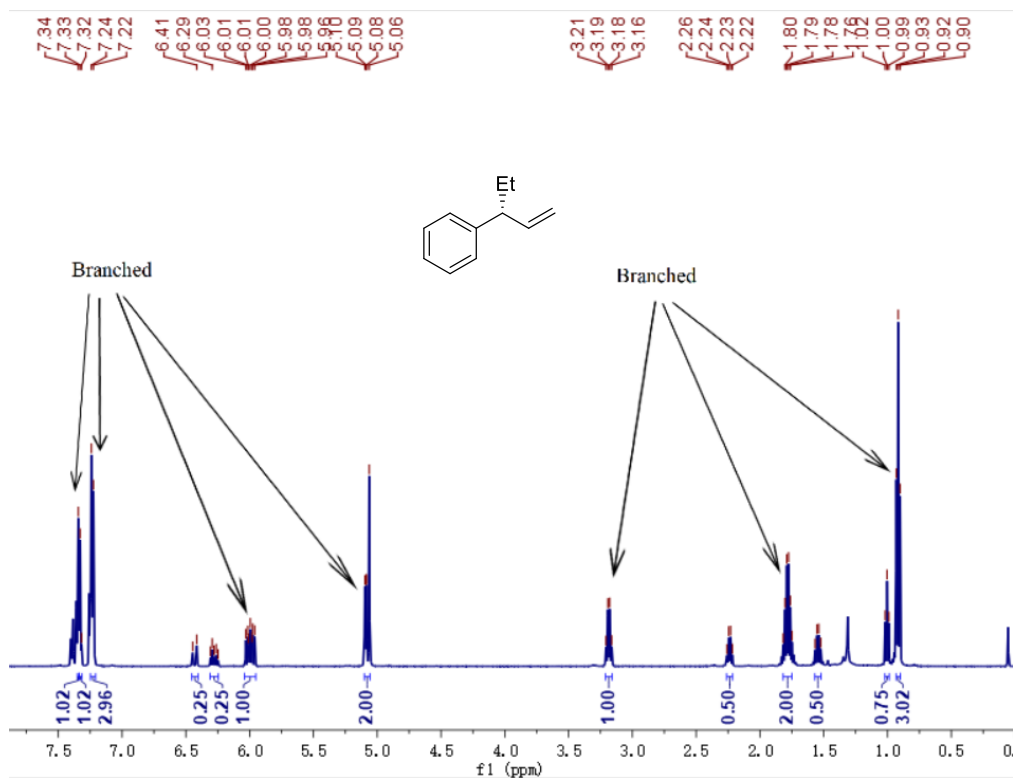

**Figure S32:** <sup>1</sup>H NMR (500 MHz, CDCl<sub>3</sub>) spectrum of **3aa** and **4aa** (The left peaks are linear products.)

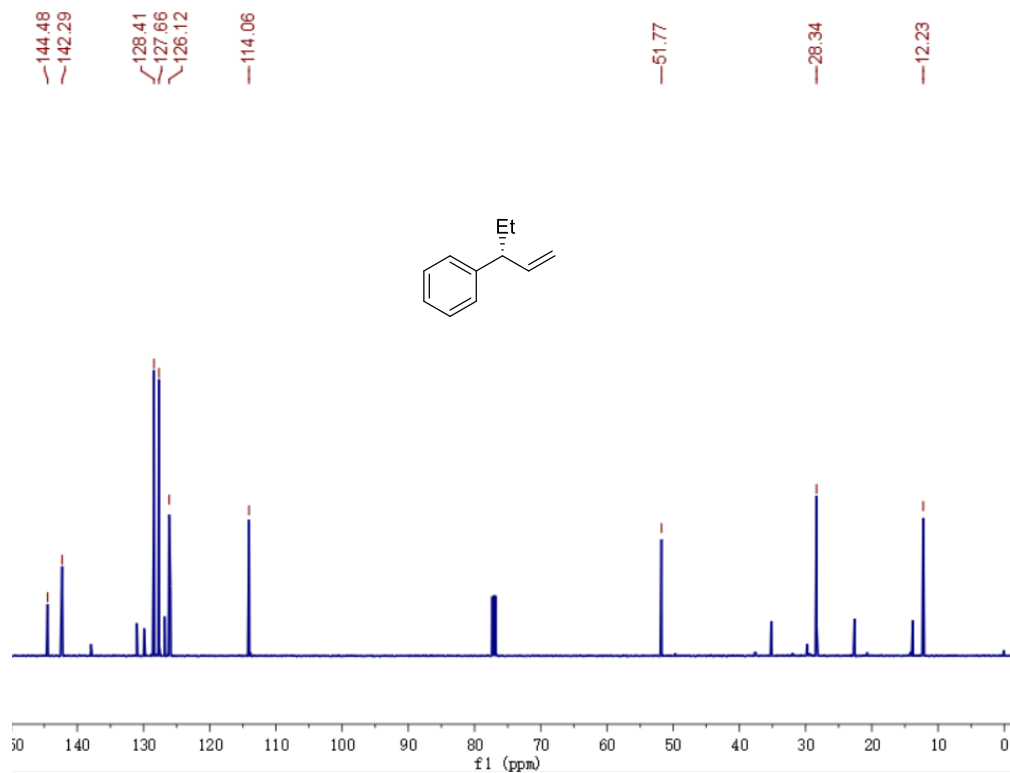

**Figure S33:** <sup>13</sup>C NMR (126 MHz, CDCl<sub>3</sub>) spectrum of **3aa** and **4aa**

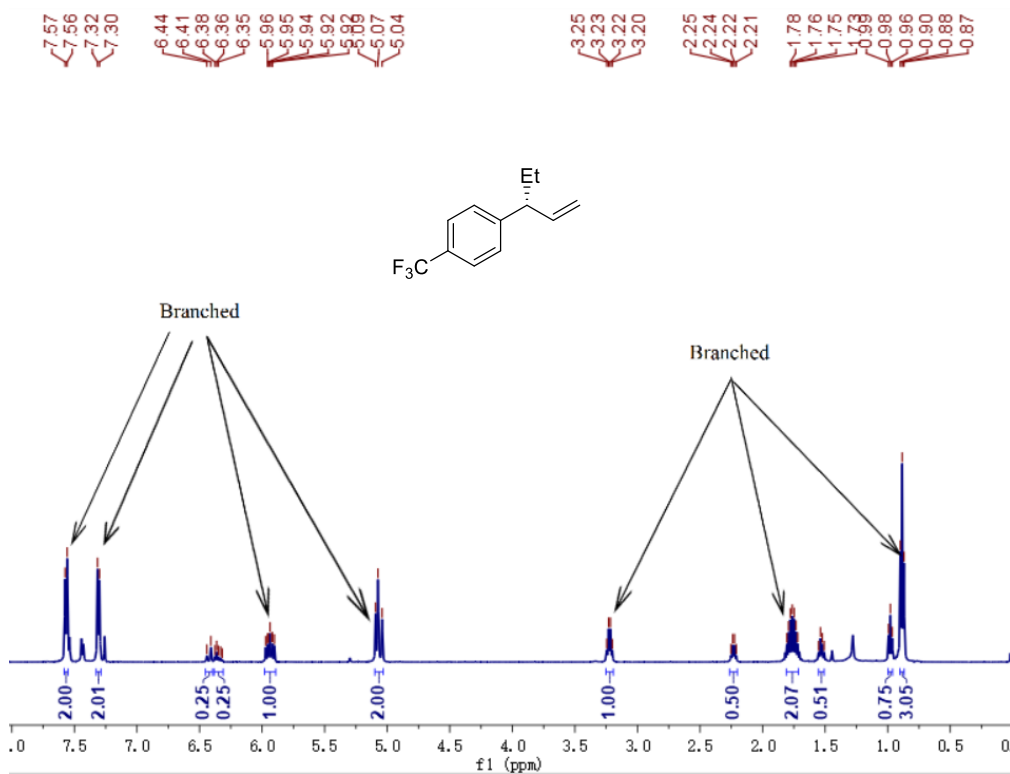

**Figure S34:** <sup>1</sup>H NMR (500 MHz, CDCl<sub>3</sub>) spectrum of **3ba** and **4ba** (The left peaks are linear products.)

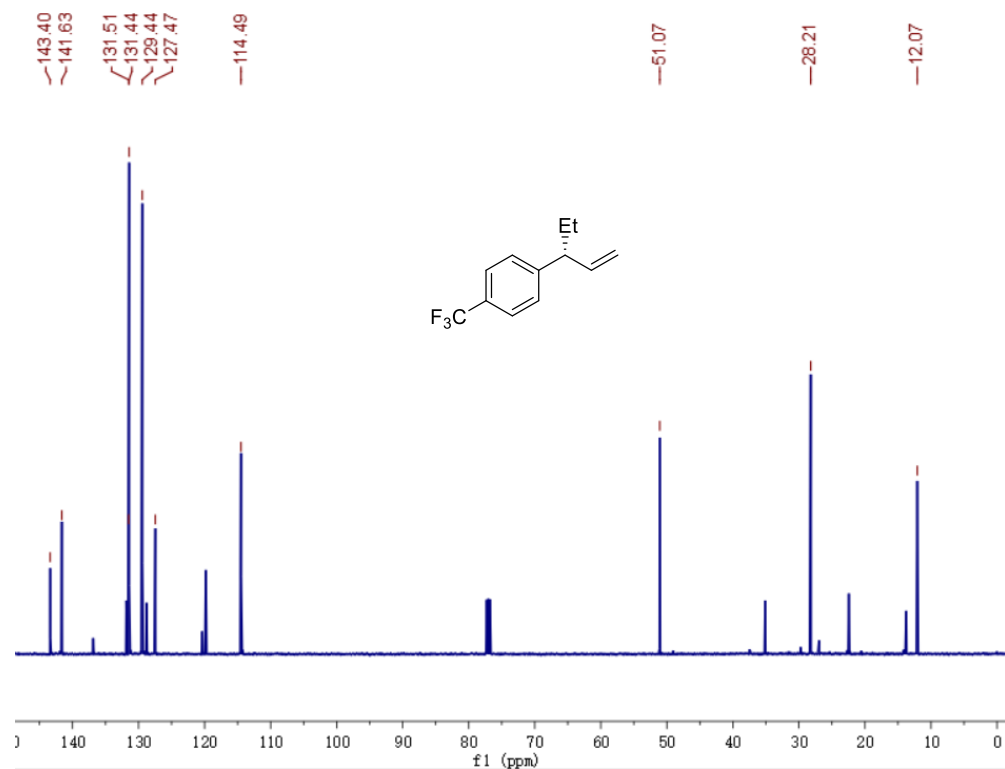

**Figure S35:** <sup>13</sup>C NMR (126 MHz, CDCl<sub>3</sub>) spectrum of **3ba** and **4ba**

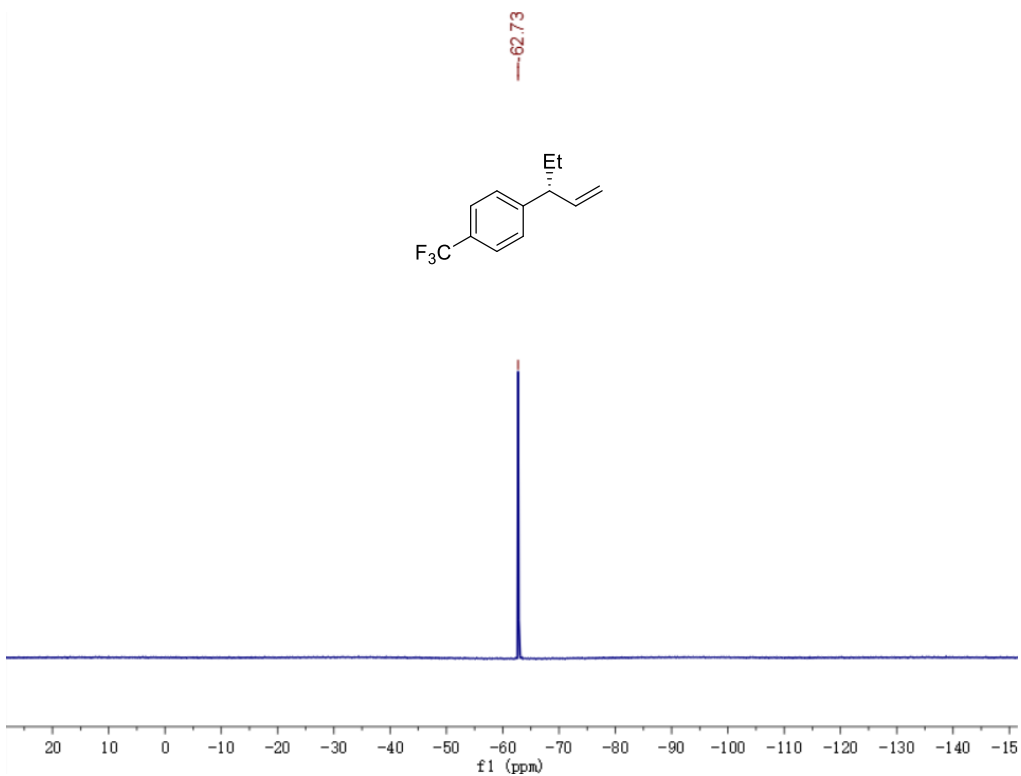

**Figure S36:** <sup>19</sup>F NMR (282 MHz, CDCl<sub>3</sub>) spectrum of **3ba** and **4ba**



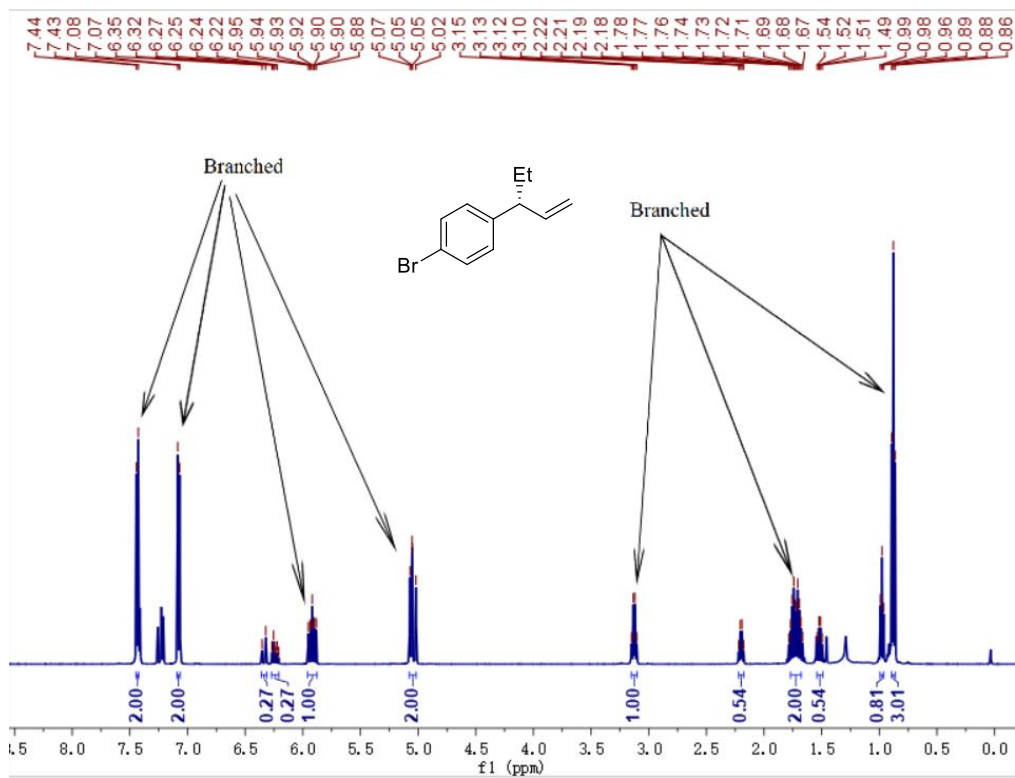

**Figure S37:**  $^1\text{H}$  NMR (500 MHz,  $\text{CDCl}_3$ ) spectrum of **3ca** and **4ca** (The left peaks are linear products.)

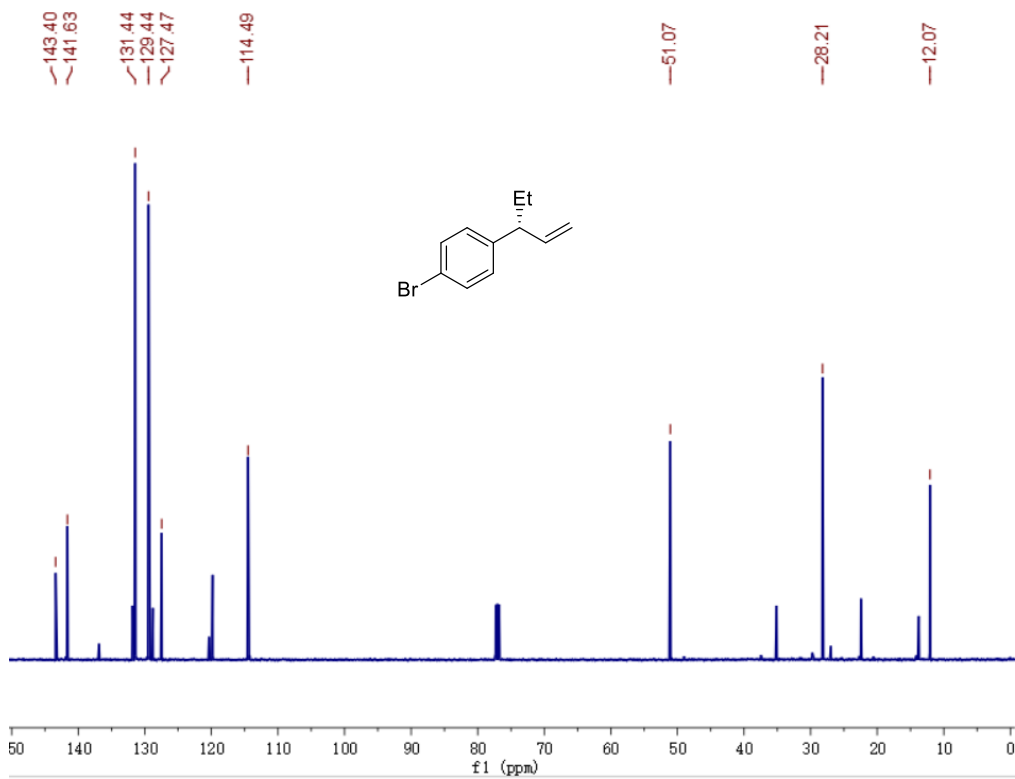

**Figure S38:**  $^{13}\text{C}$  NMR (126 MHz,  $\text{CDCl}_3$ ) spectrum of **3ca** and **4ca**

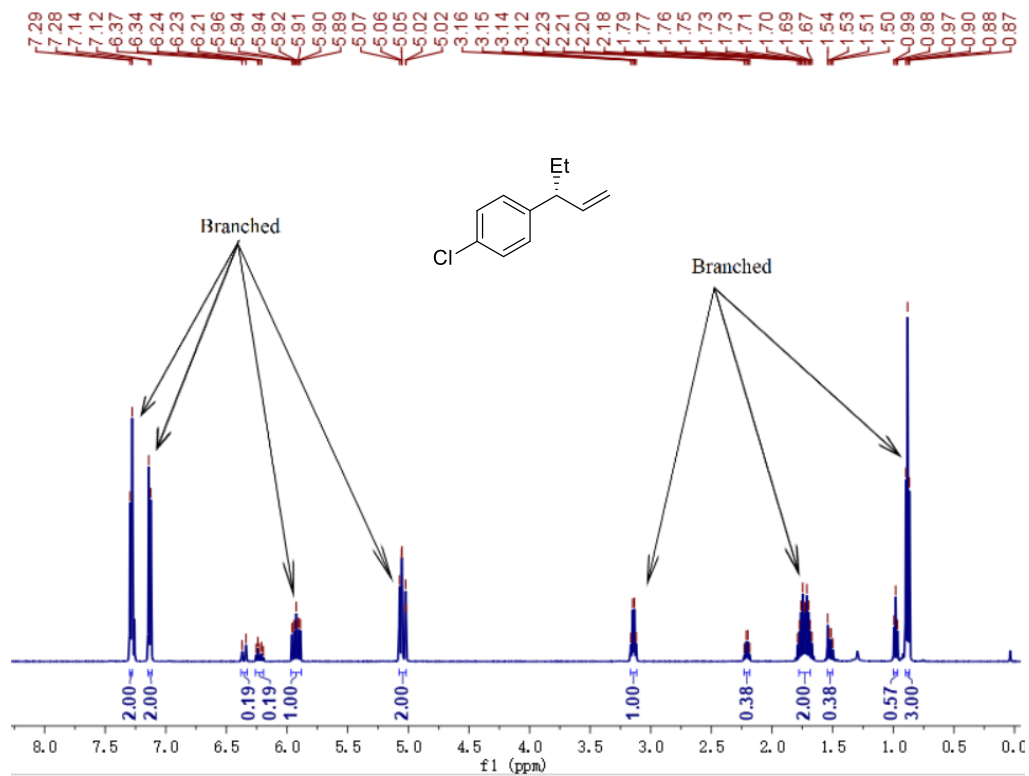

**Figure S39:** <sup>1</sup>H NMR (500 MHz, CDCl<sub>3</sub>) spectrum of **3da** and **4da** (The left peaks are linear products.)

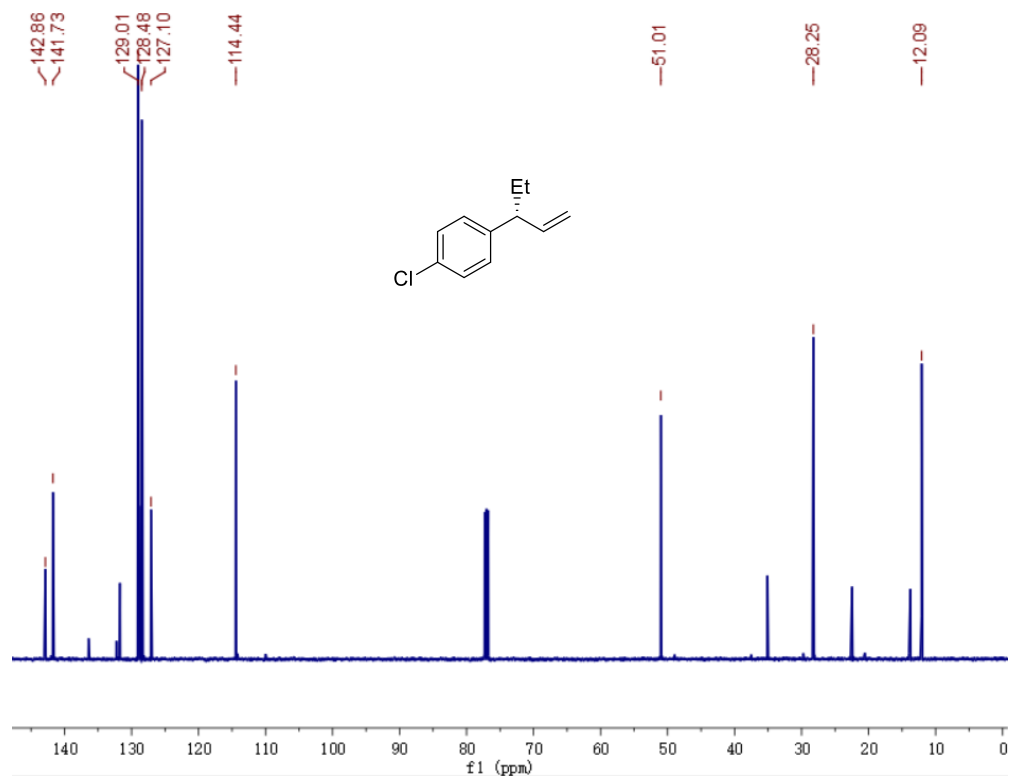

**Figure S40:** <sup>13</sup>C NMR (126 MHz, CDCl<sub>3</sub>) spectrum of **3da** and **4da**

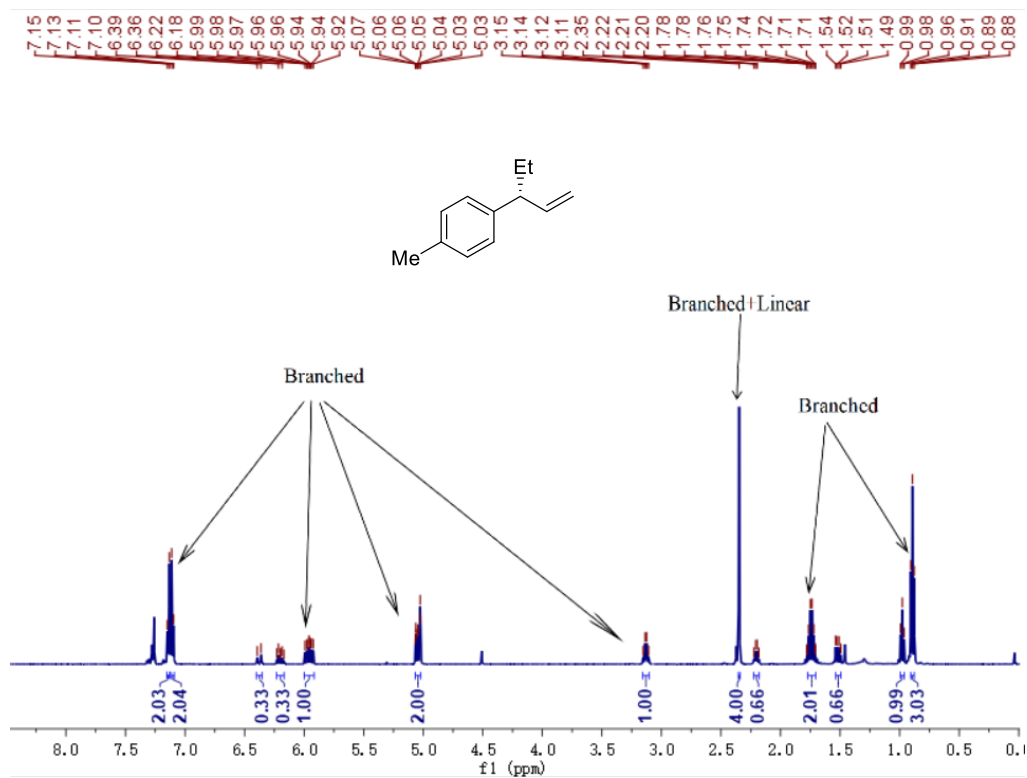

**Figure S41:**  $^1\text{H}$  NMR (500 MHz,  $\text{CDCl}_3$ ) spectrum of **3ea** and **4ea** (The left peaks are linear products.)

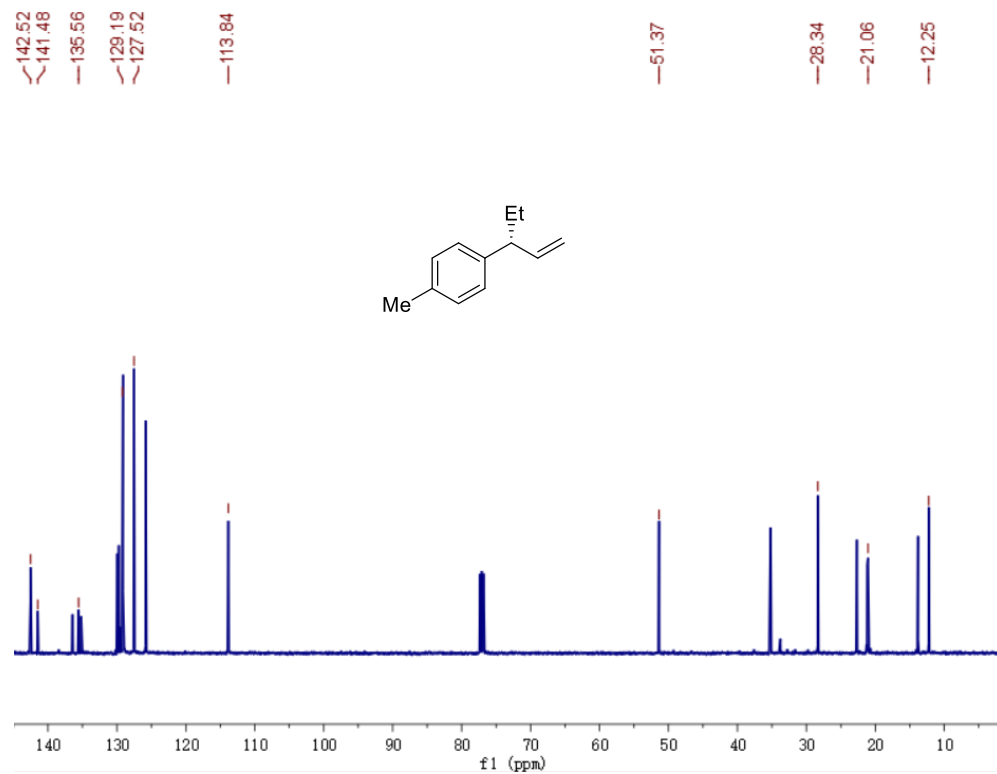

**Figure S42:**  $^{13}\text{C}$  NMR (126 MHz,  $\text{CDCl}_3$ ) spectrum of **3ea** and **4ea**

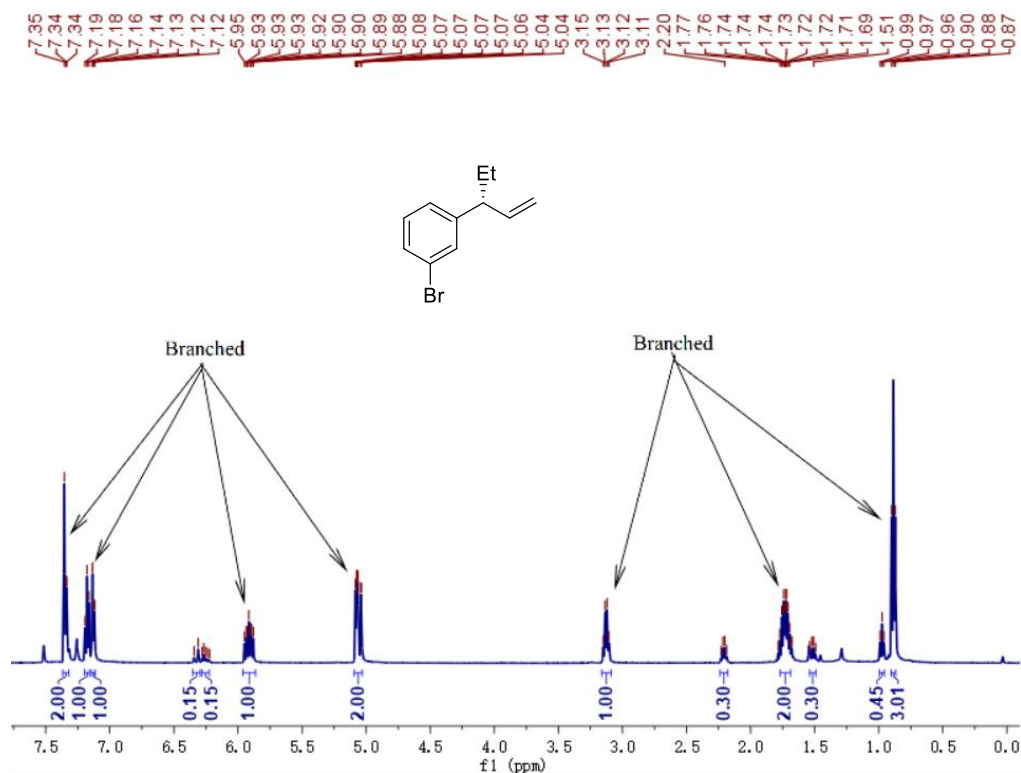

**Figure S43:** <sup>1</sup>H NMR (500 MHz, CDCl<sub>3</sub>) spectrum of **3fa** and **4fa** (The left peaks are linear products.)

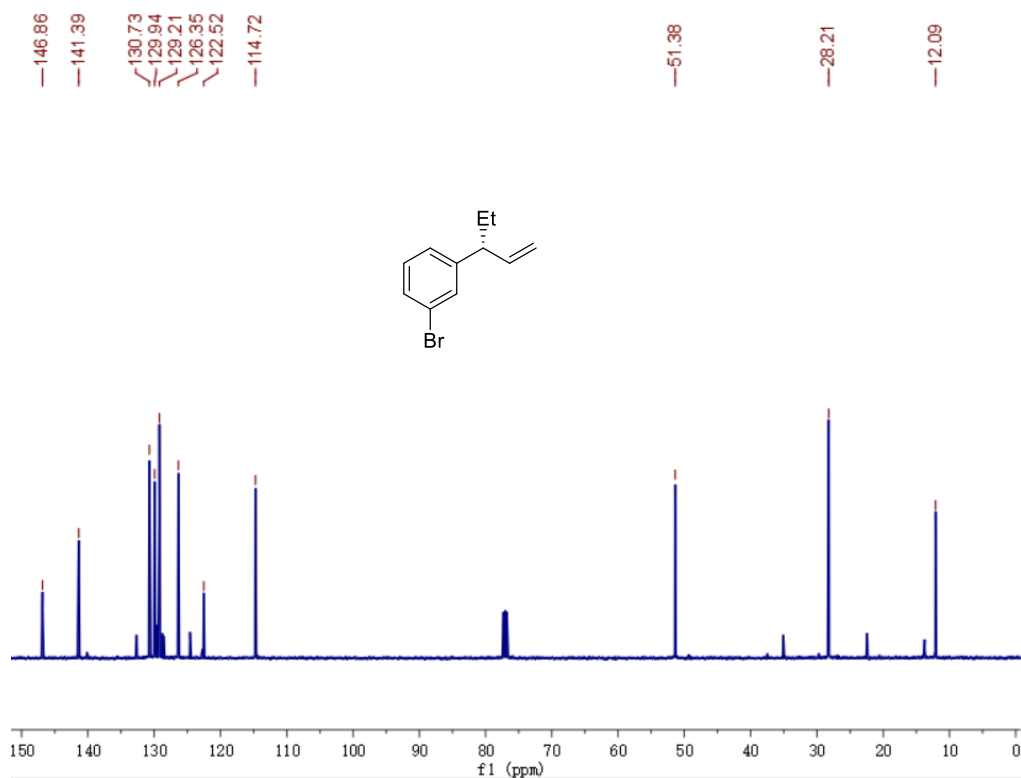

**Figure S44:** <sup>13</sup>C NMR (126 MHz, CDCl<sub>3</sub>) spectrum of **3fa** and **4fa**

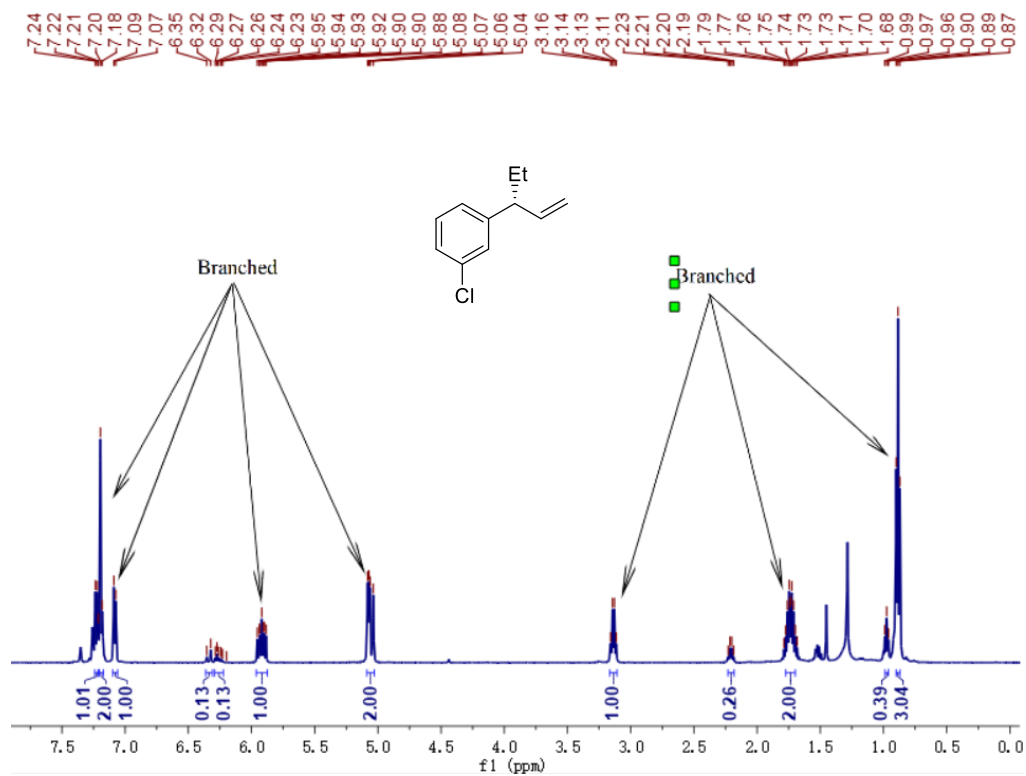

**Figure S45:** <sup>1</sup>H NMR (500 MHz, CDCl<sub>3</sub>) spectrum of **3ga** and **4ga** (The left peaks are linear products.)

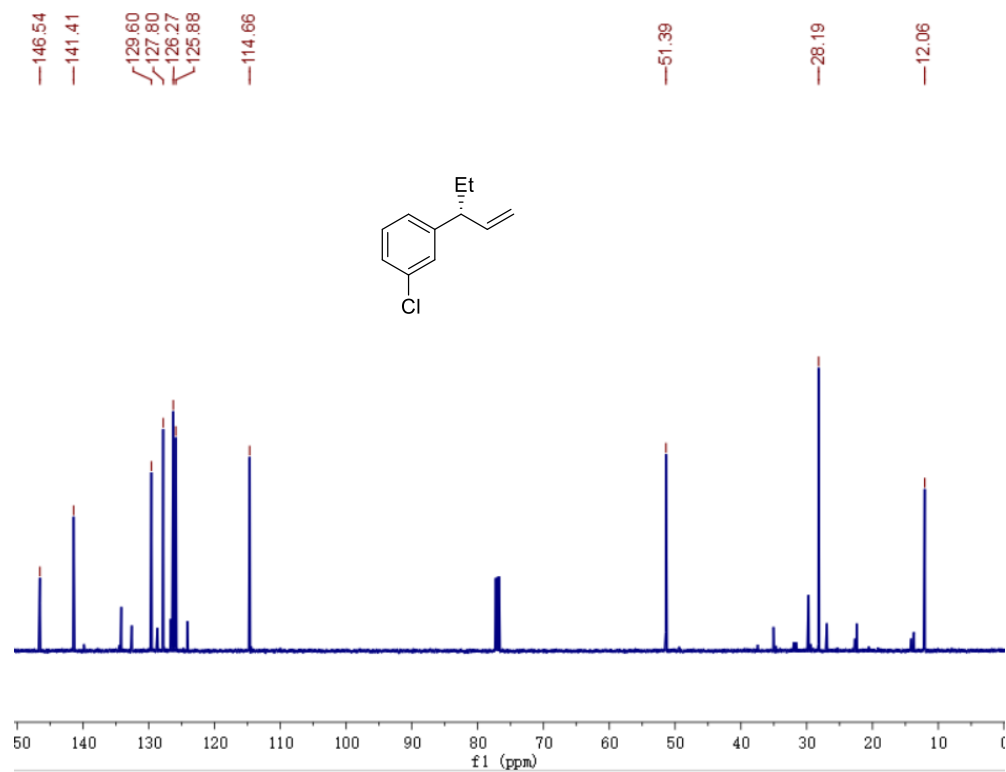

**Figure S46:** <sup>13</sup>C NMR (126 MHz, CDCl<sub>3</sub>) spectrum of **3ga** and **4ga**

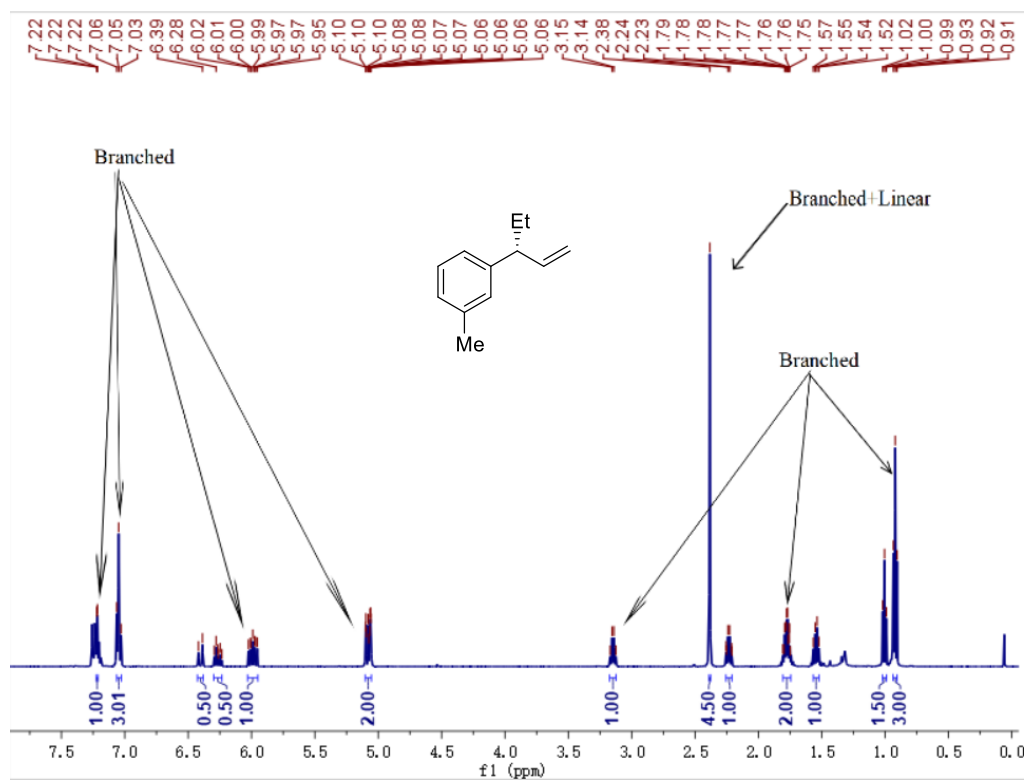

**Figure S47:**  $^1\text{H}$  NMR (500 MHz,  $\text{CDCl}_3$ ) spectrum of **3ha** and **4ha** (The left peaks are linear products.)

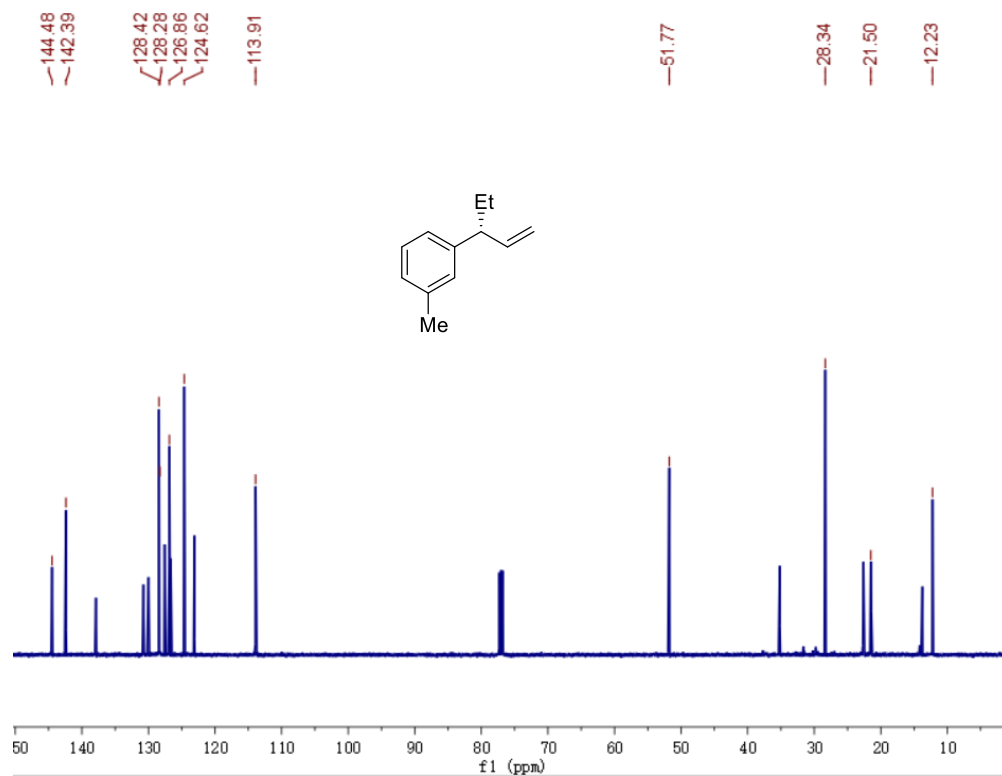

**Figure S48:**  $^{13}\text{C}$  NMR (126 MHz,  $\text{CDCl}_3$ ) spectrum of **3ha** and **4ha**

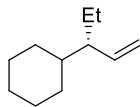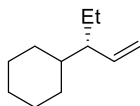

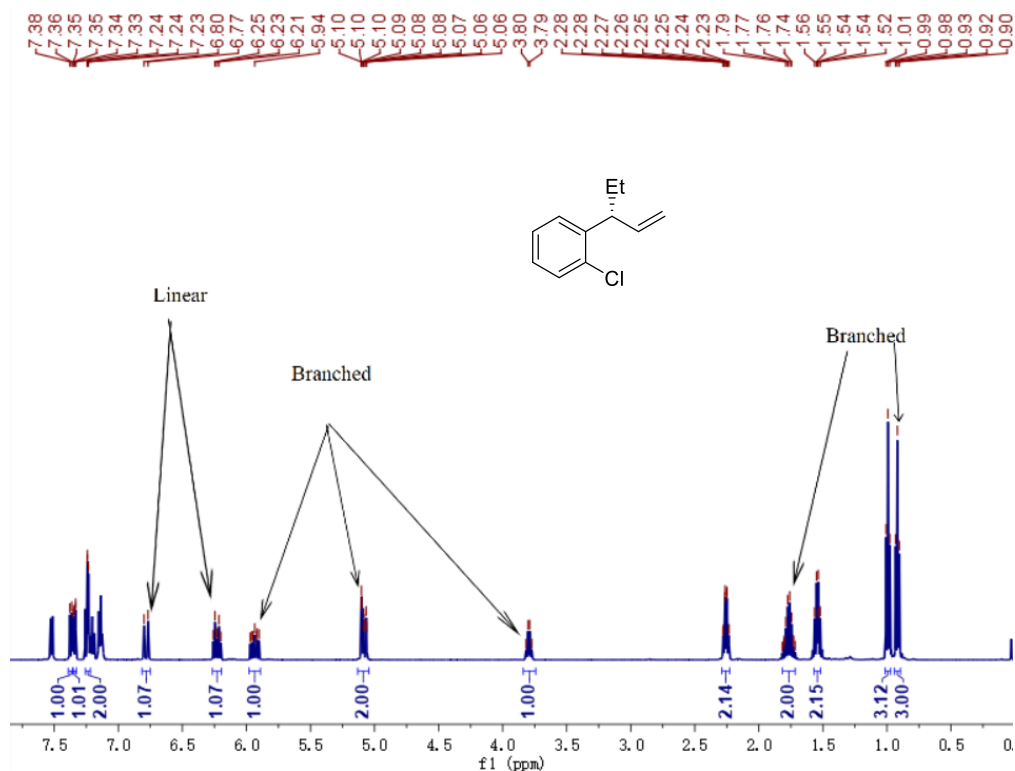

Figure S51: <sup>1</sup>H NMR (500 MHz, CDCl<sub>3</sub>) spectrum of **3ja** and **4ja**

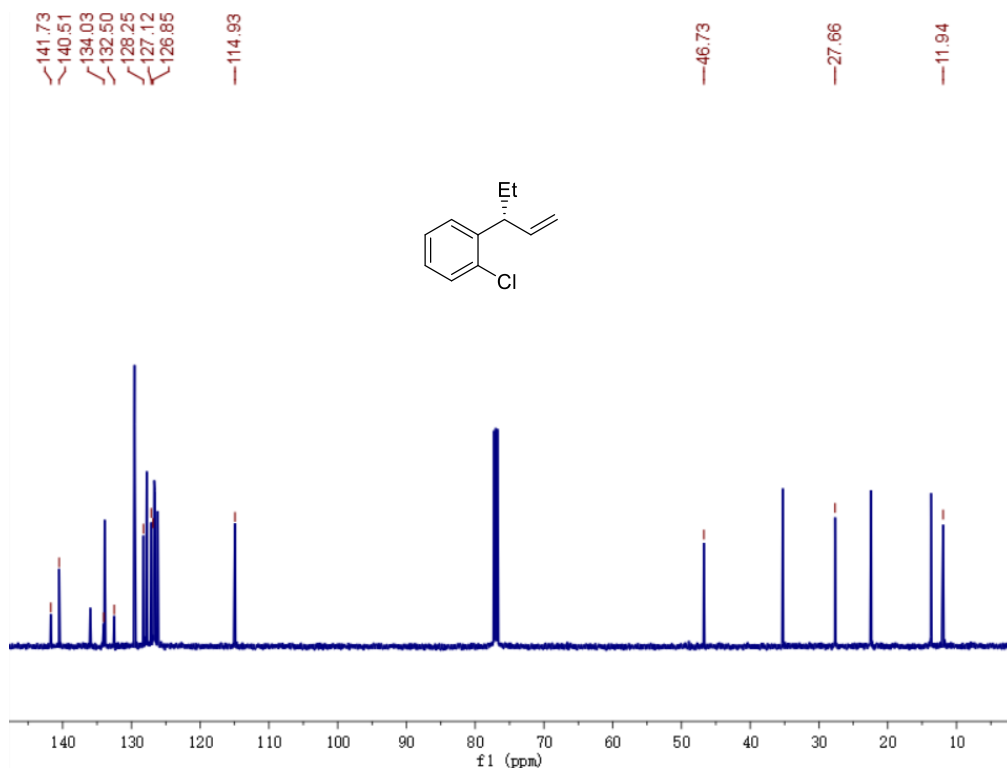

Figure S52: <sup>13</sup>C NMR (126 MHz, CDCl<sub>3</sub>) spectrum of **3ja** and **4ja**



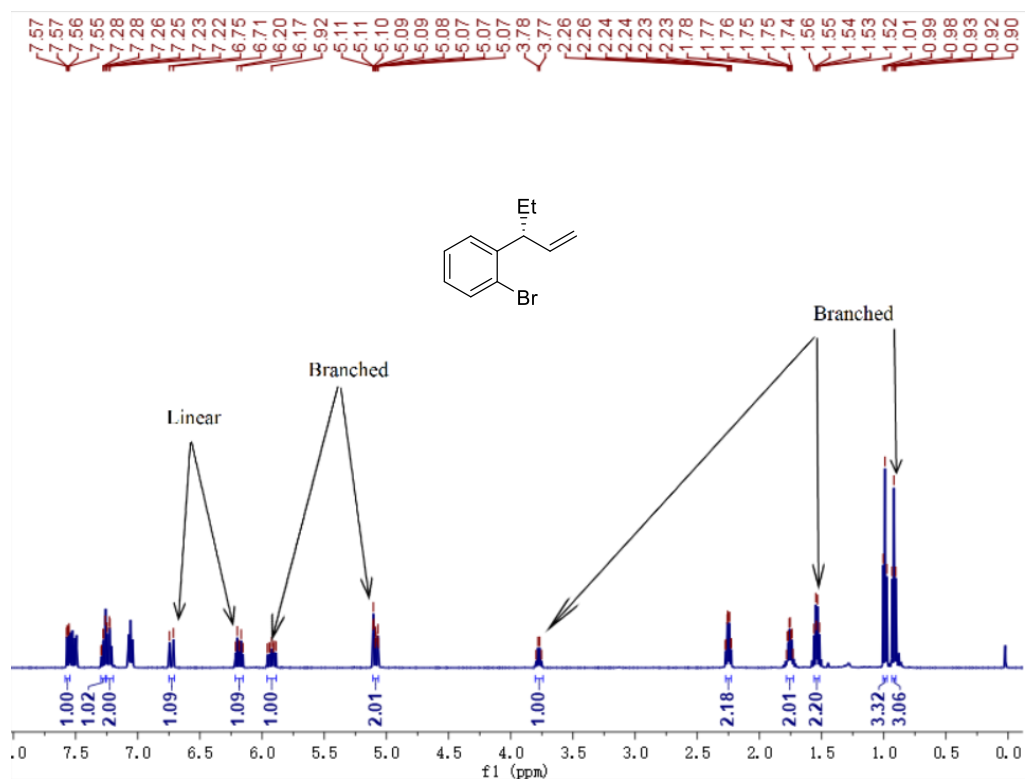

**Figure S53:** <sup>1</sup>H NMR (500 MHz, CDCl<sub>3</sub>) spectrum of **3ka** and **4ka**

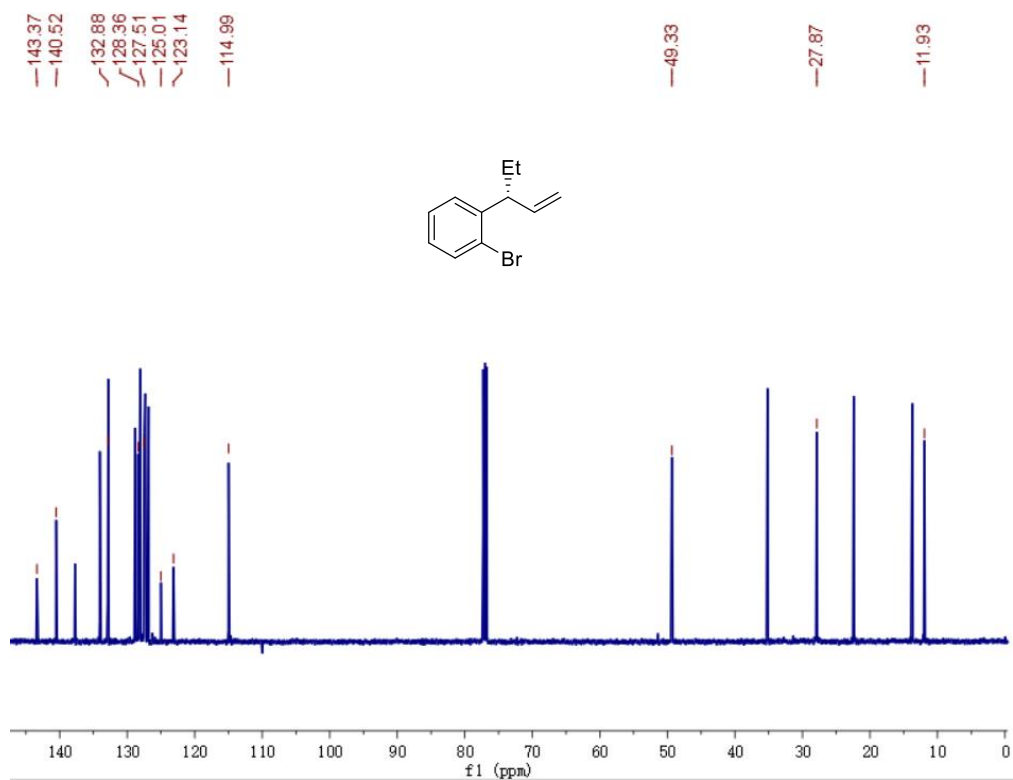

**Figure S54:** <sup>13</sup>C NMR (126 MHz, CDCl<sub>3</sub>) spectrum of **3ka** and **4ka**

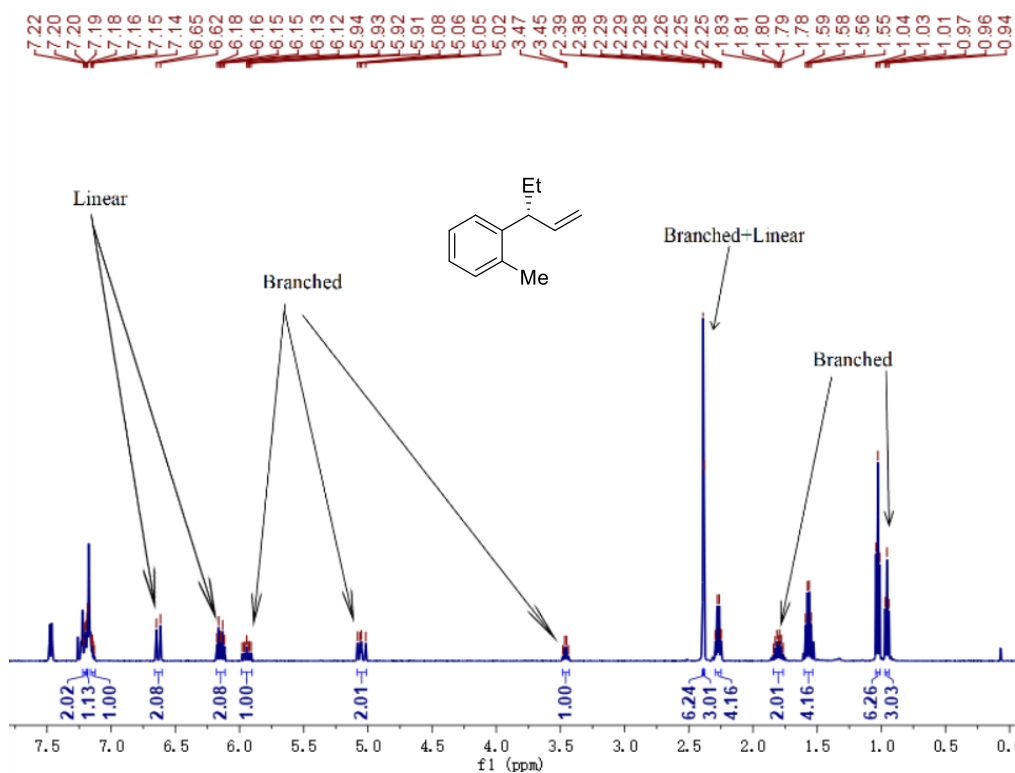

Figure S55: <sup>1</sup>H NMR (500 MHz, CDCl<sub>3</sub>) spectrum of **3la** and **4la**

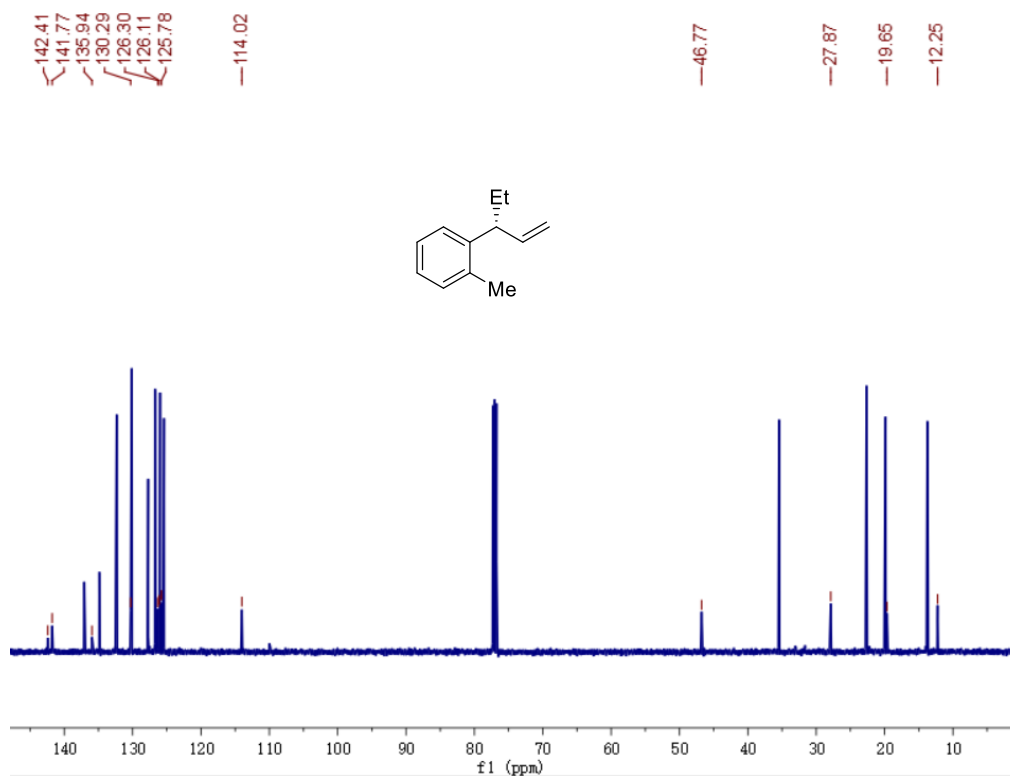

Figure S56: <sup>13</sup>C NMR (126 MHz, CDCl<sub>3</sub>) spectrum of **3la** and **4la**

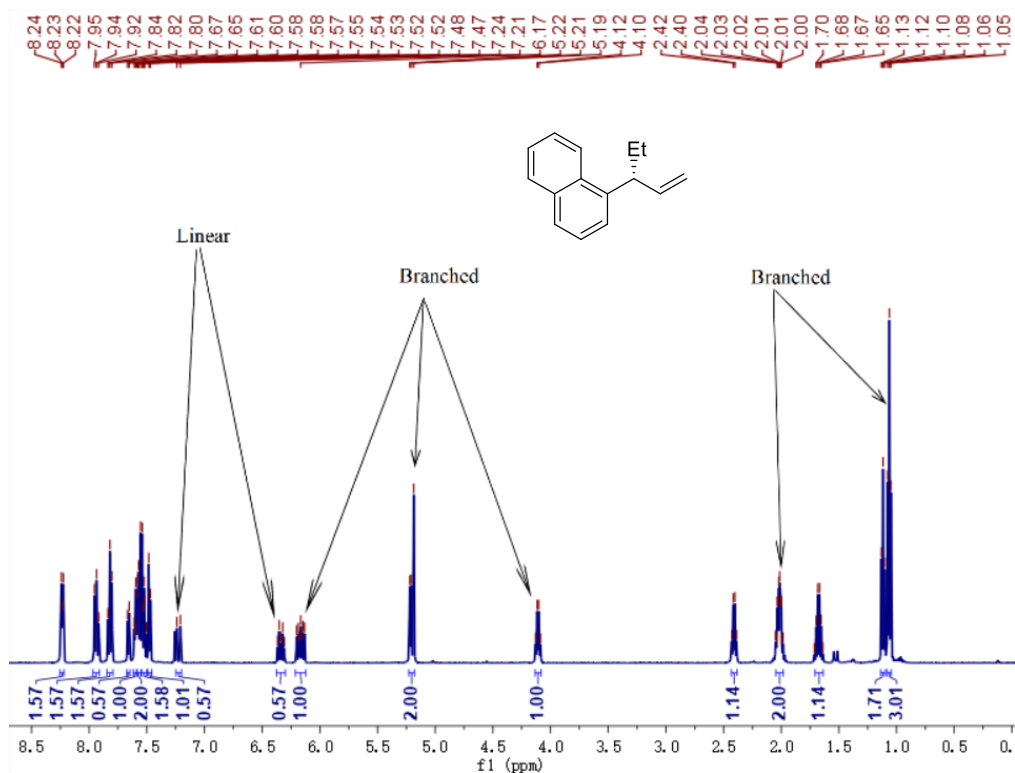

Figure S57: <sup>1</sup>H NMR (500 MHz, CDCl<sub>3</sub>) spectrum of **3ma** and **4ma**

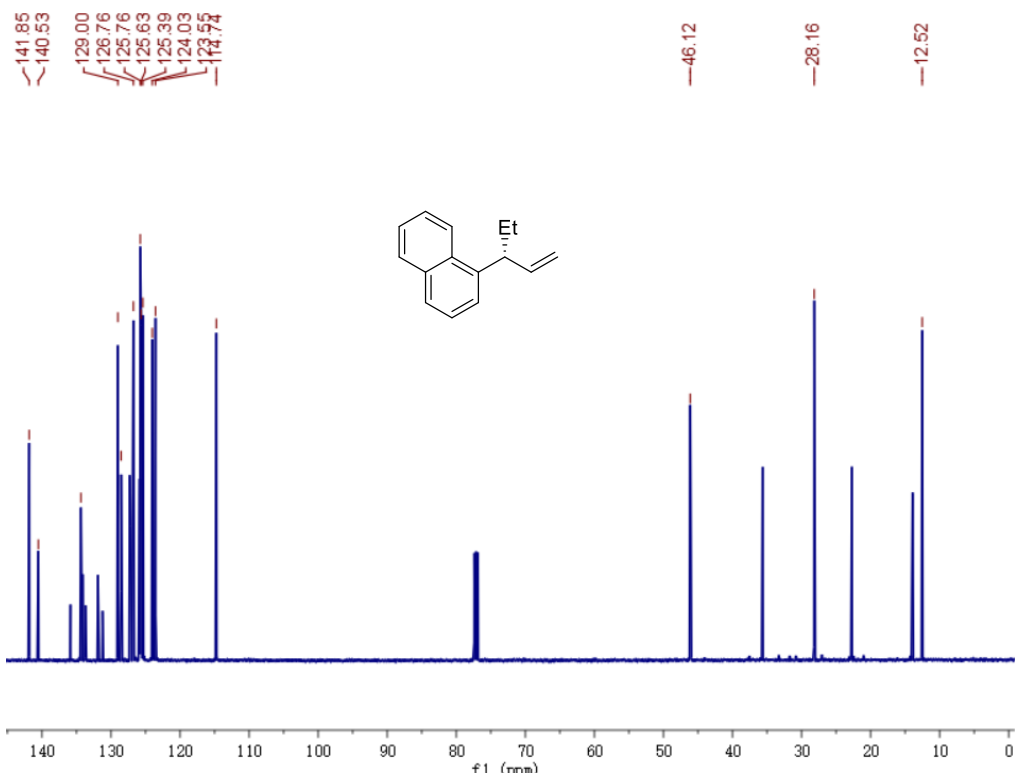

Figure S58: <sup>13</sup>C NMR (126 MHz, CDCl<sub>3</sub>) spectrum of **3ma** and **4ma**

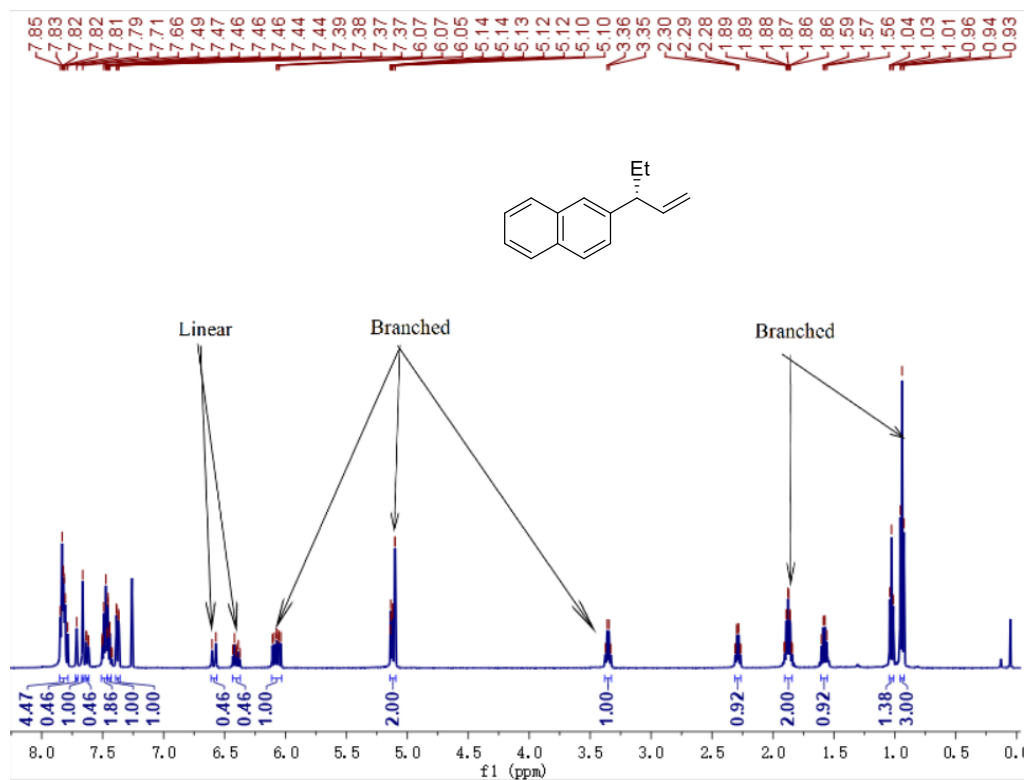

Figure S59: <sup>1</sup>H NMR (500 MHz, CDCl<sub>3</sub>) spectrum of **3na** and **4na**

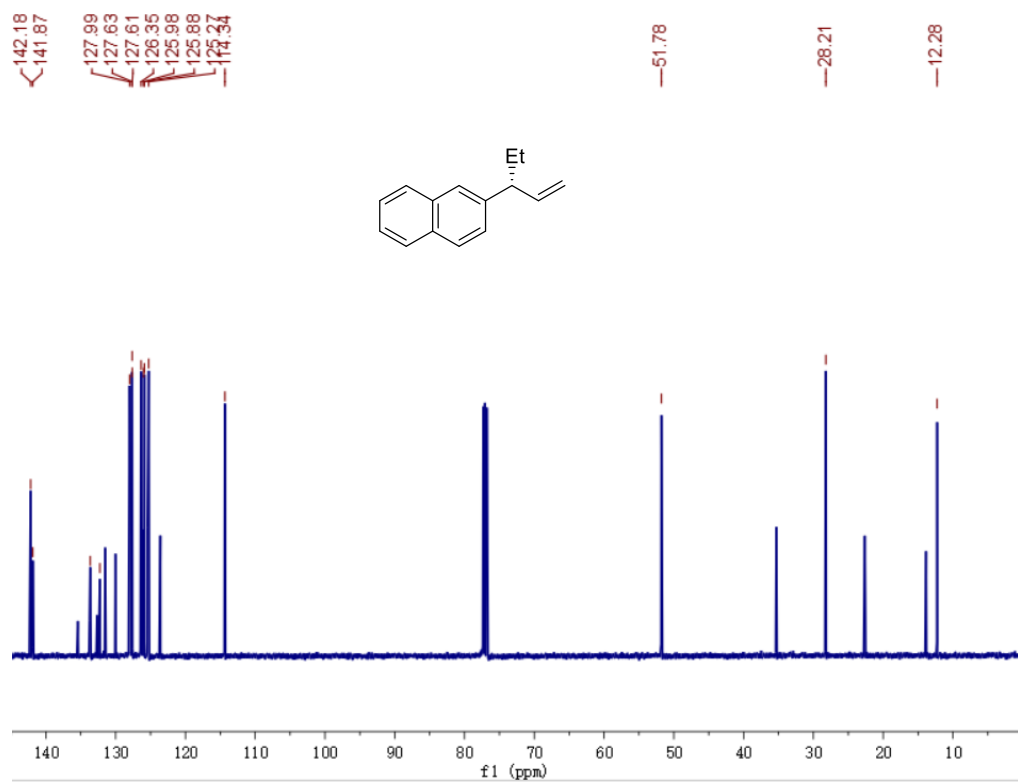

Figure S60: <sup>13</sup>C NMR (126 MHz, CDCl<sub>3</sub>) spectrum of **3na** and **4na**

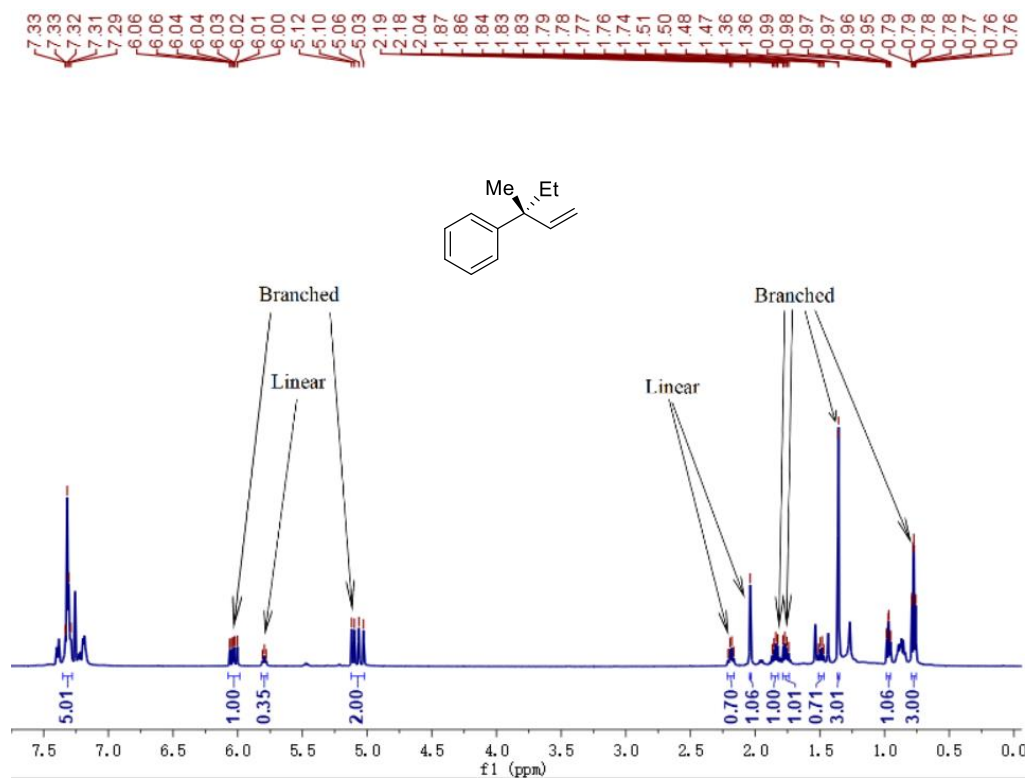

Figure S61: <sup>1</sup>H NMR (500 MHz, CDCl<sub>3</sub>) spectrum of 3a and 4a

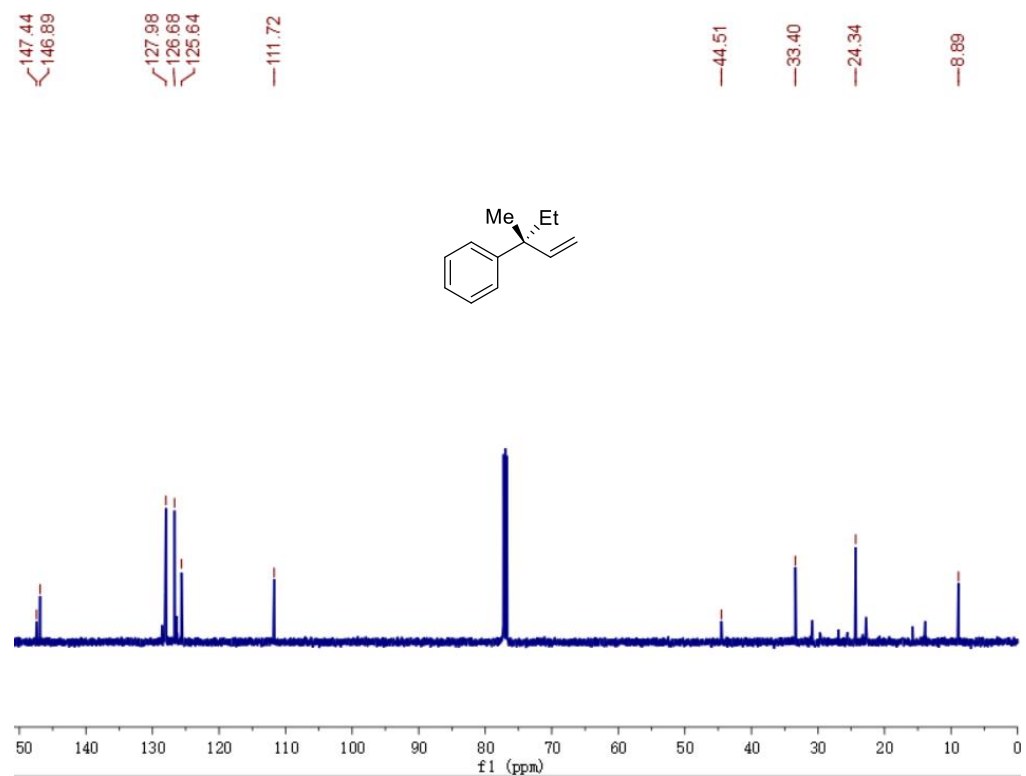

Figure S62: <sup>13</sup>C NMR (126 MHz, CDCl<sub>3</sub>) spectrum of 3a and 4a

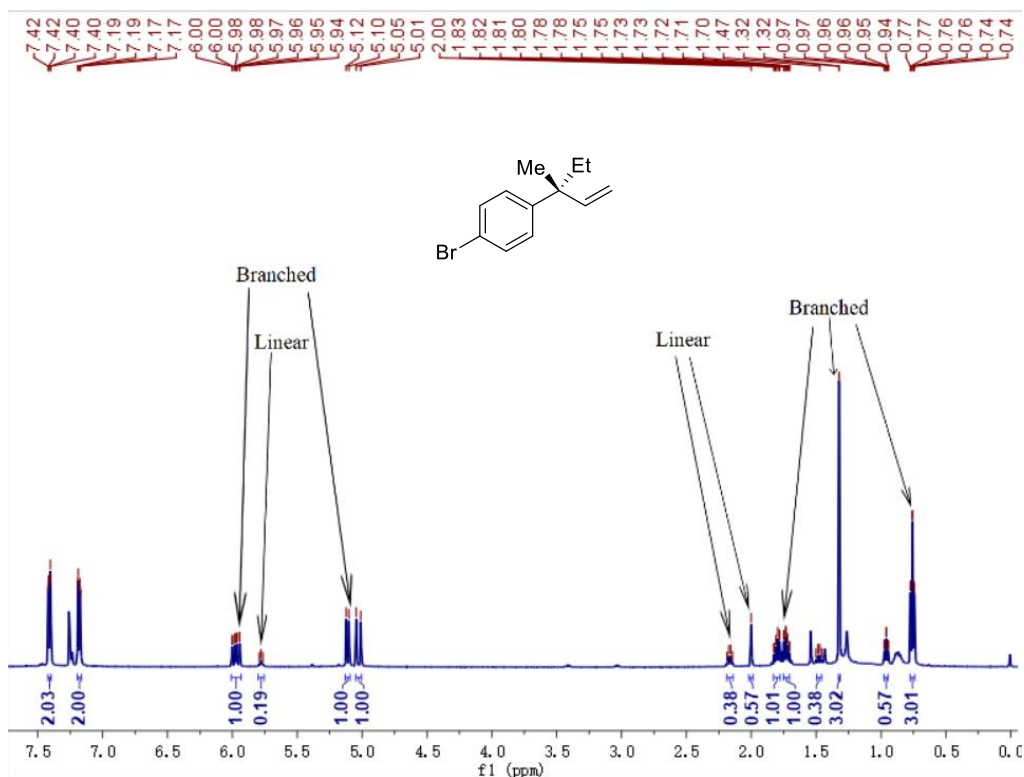

Figure S63: <sup>1</sup>H NMR (500 MHz, CDCl<sub>3</sub>) spectrum of **3pa** and **4pa**

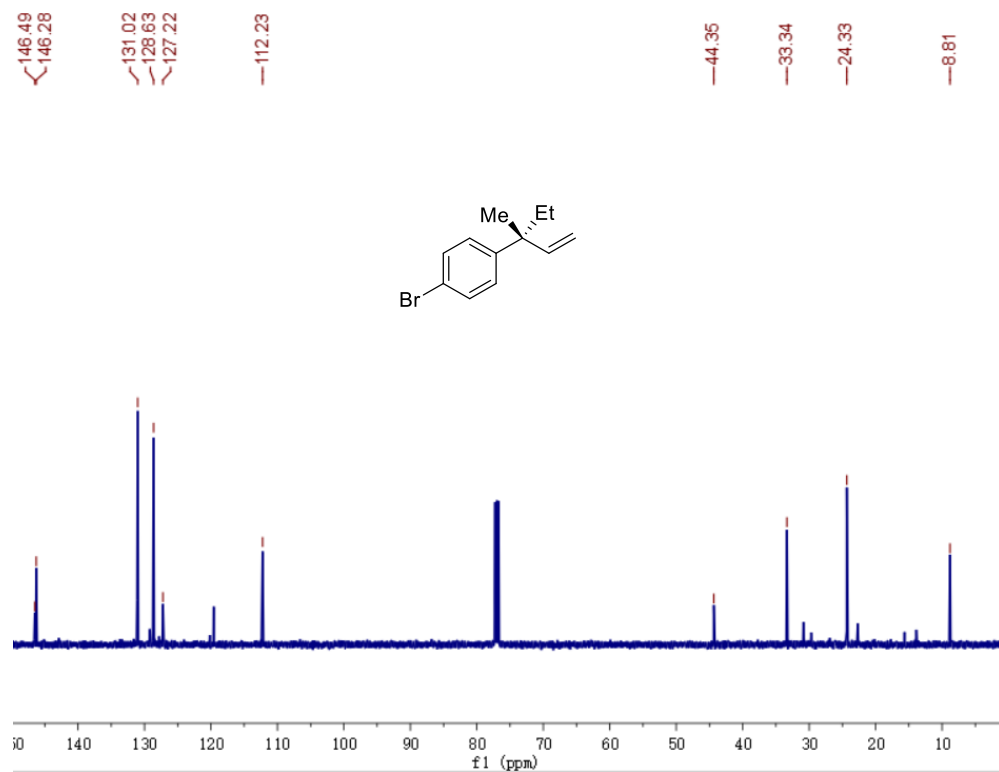

Figure S64: <sup>13</sup>C NMR (126 MHz, CDCl<sub>3</sub>) spectrum of **3pa** and **4pa**

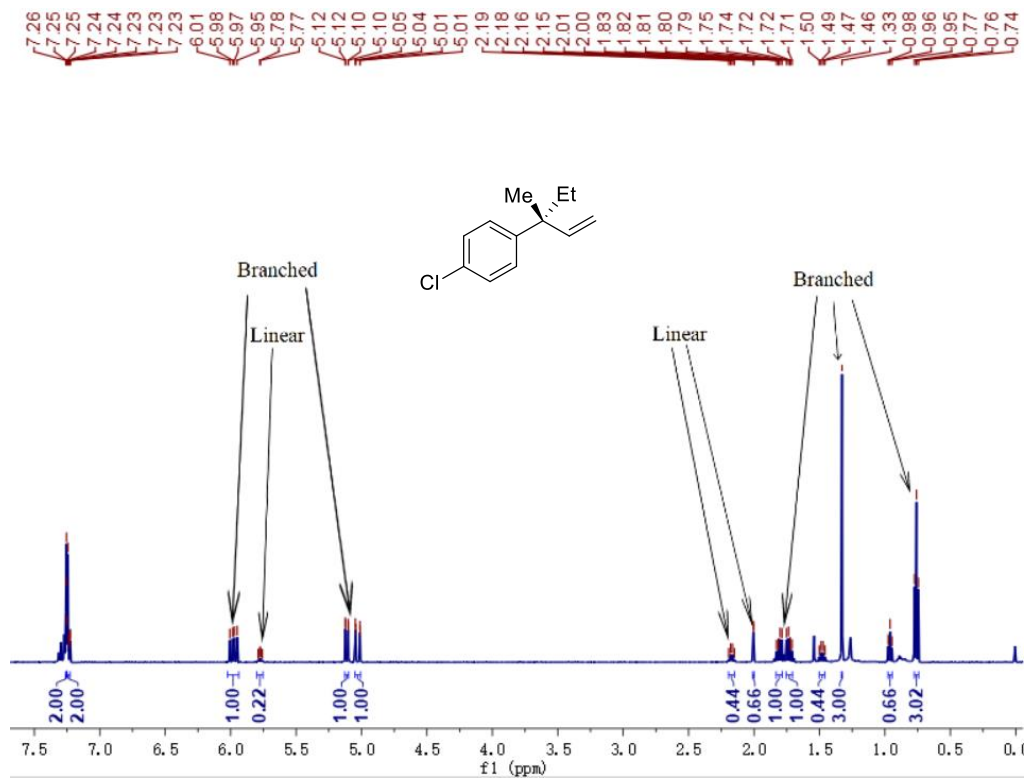

Figure S65: <sup>1</sup>H NMR (500 MHz, CDCl<sub>3</sub>) spectrum of **3qa** and **4qa**

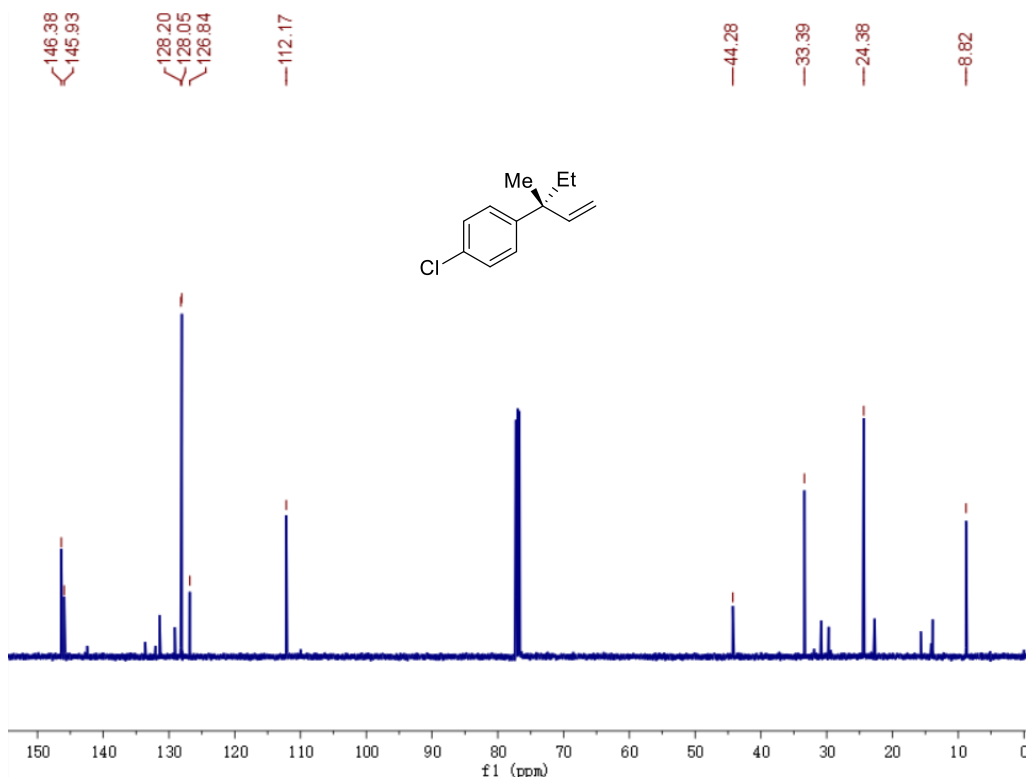

Figure S66: <sup>13</sup>C NMR (126 MHz, CDCl<sub>3</sub>) spectrum of **3qa** and **4qa**

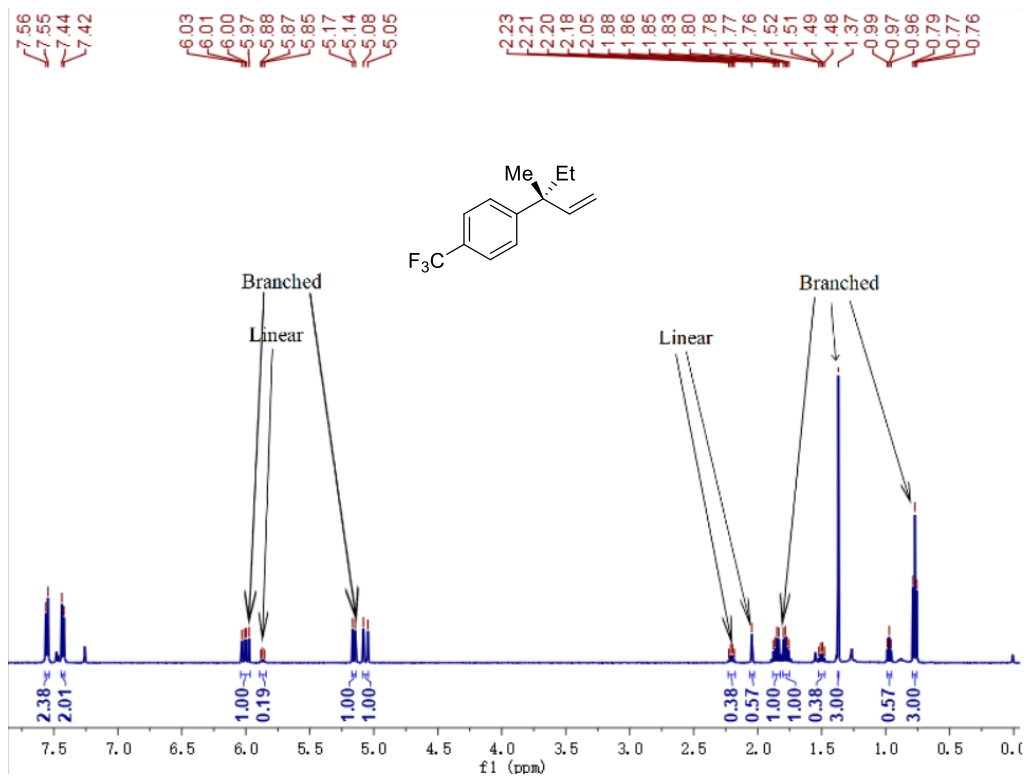

**Figure S67:** <sup>1</sup>H NMR (500 MHz, CDCl<sub>3</sub>) spectrum of **3ra** and **4ra**

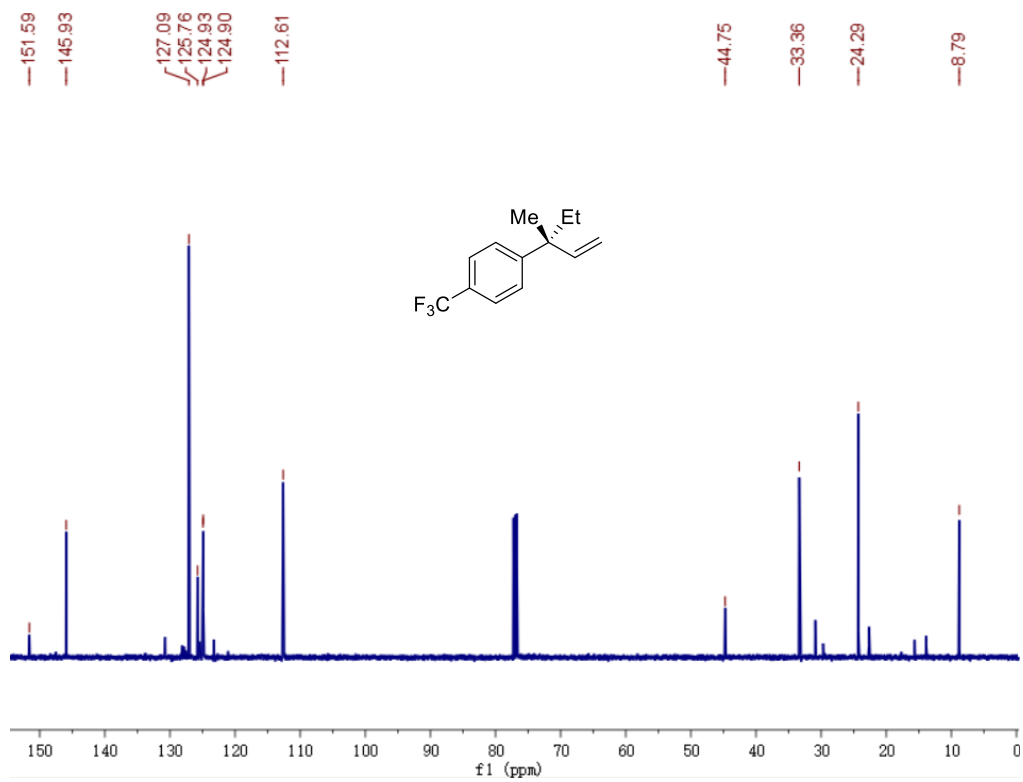

**Figure S68:** <sup>13</sup>C NMR (126 MHz, CDCl<sub>3</sub>) spectrum of **3ra** and **4ra**



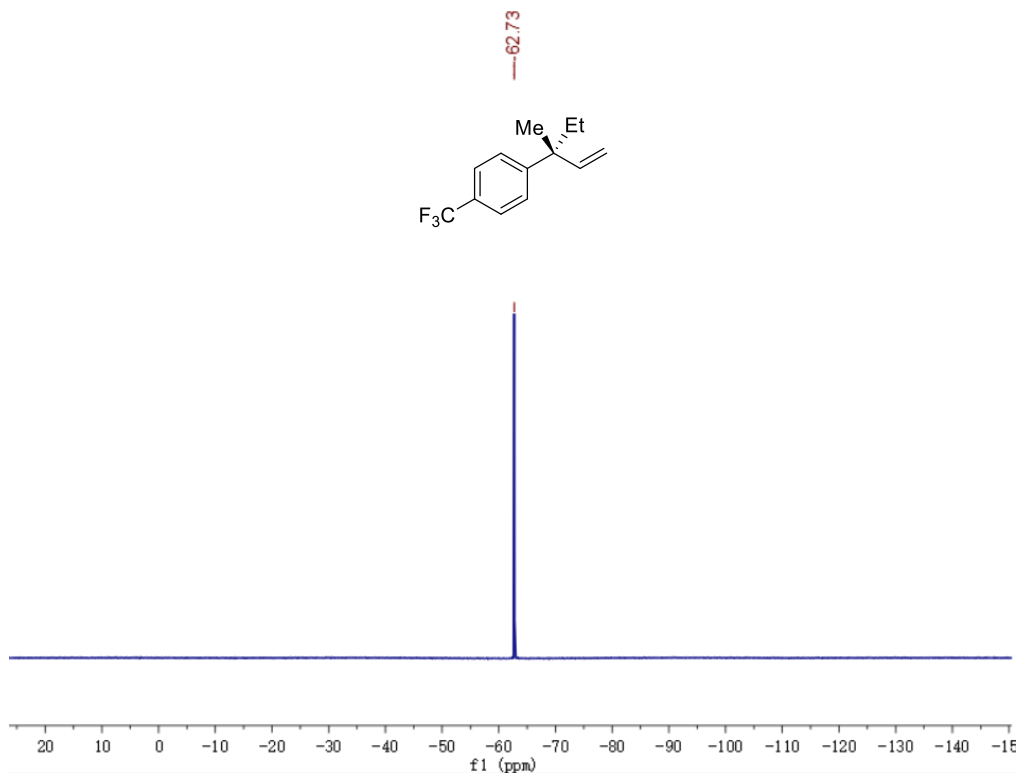

**Figure S69:**  $^{19}\text{F}$  NMR (282 MHz,  $\text{CDCl}_3$ ) spectrum of **3ra** and **4ra**

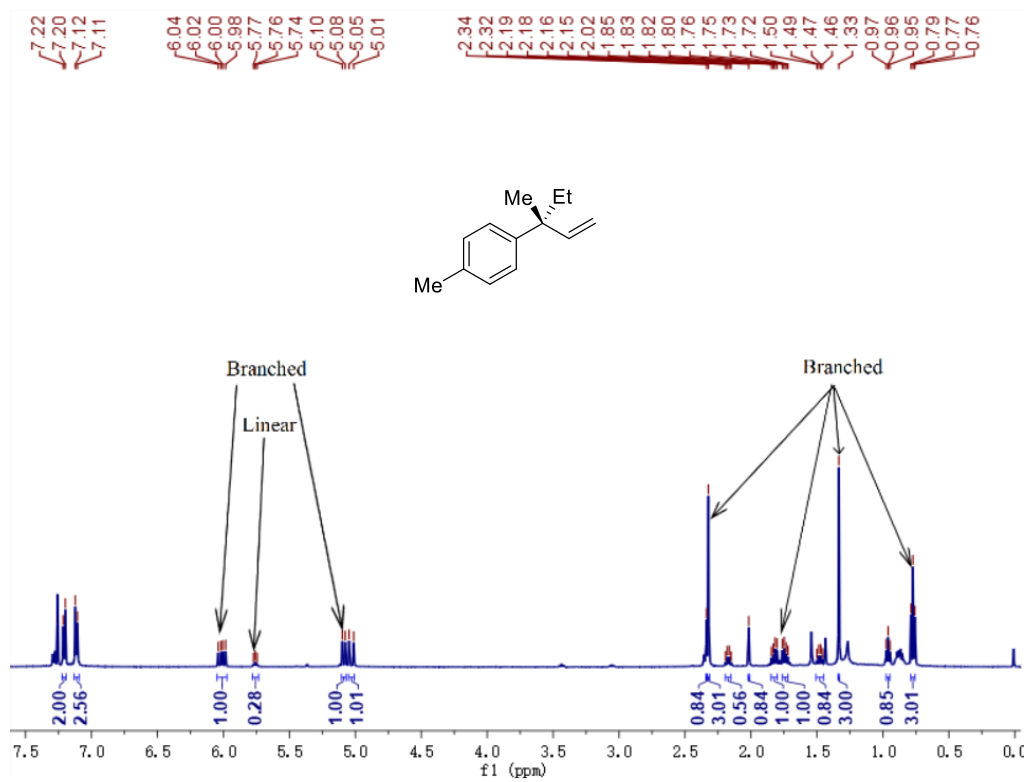

**Figure S70:**  $^1\text{H}$  NMR (500 MHz,  $\text{CDCl}_3$ ) spectrum of **3sa** and **4sa**

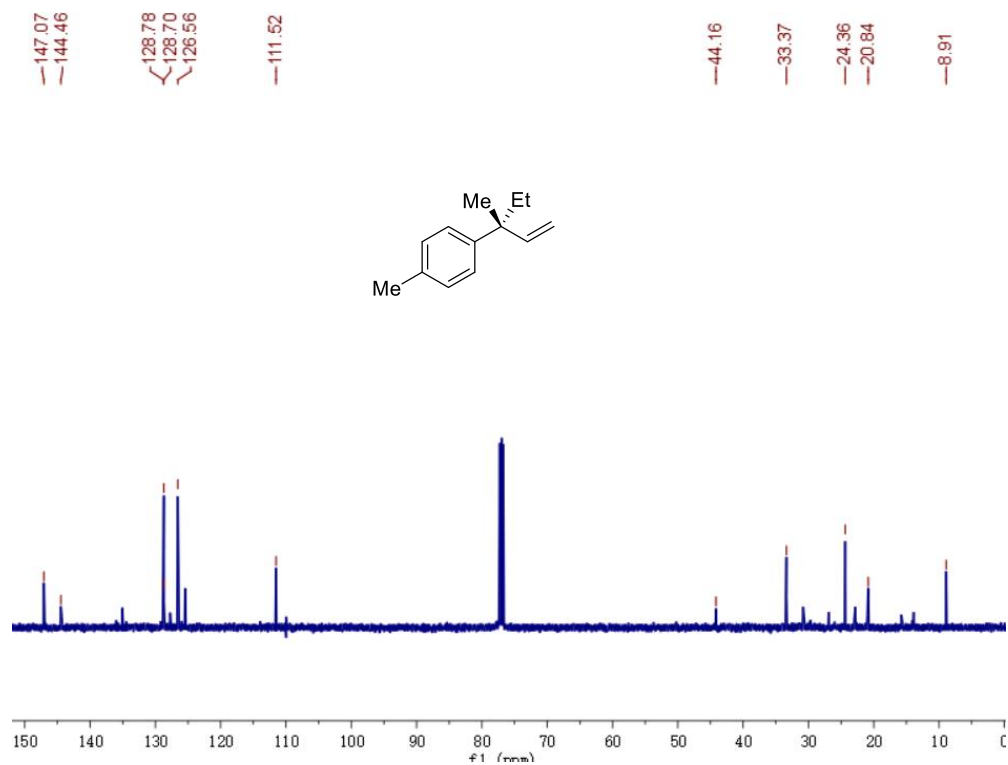

Figure S71: <sup>13</sup>C NMR (126 MHz, CDCl<sub>3</sub>) spectrum of 3sa and 4sa

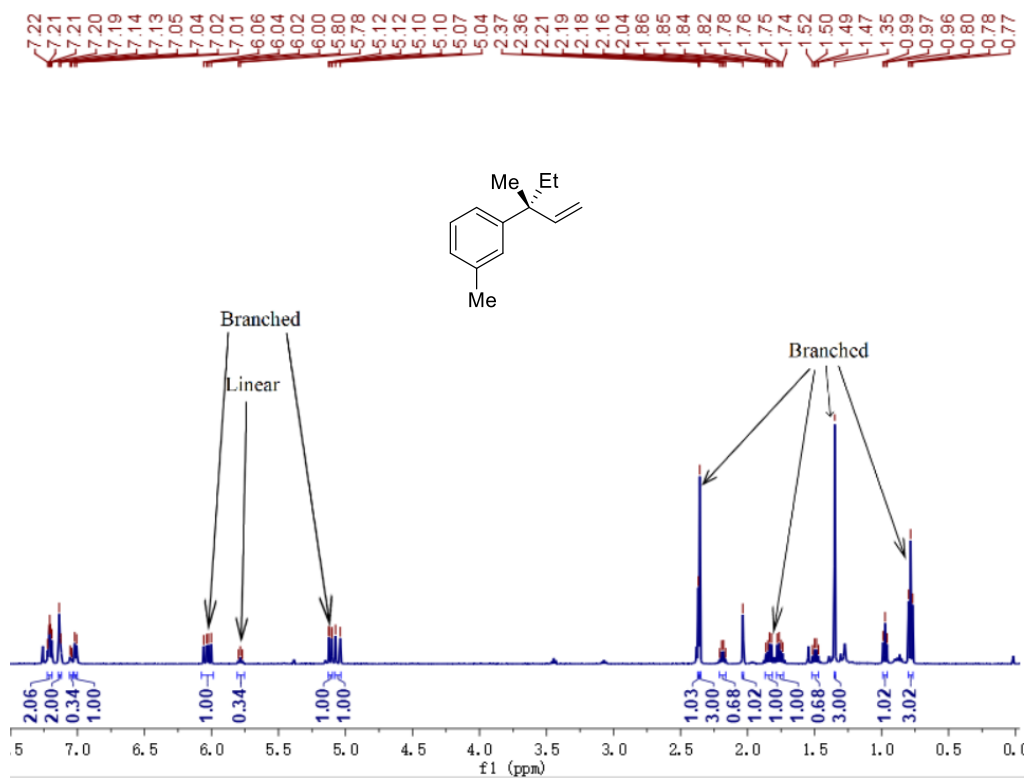

Figure S72: <sup>1</sup>H NMR (500 MHz, CDCl<sub>3</sub>) spectrum of 3ta and 4ta

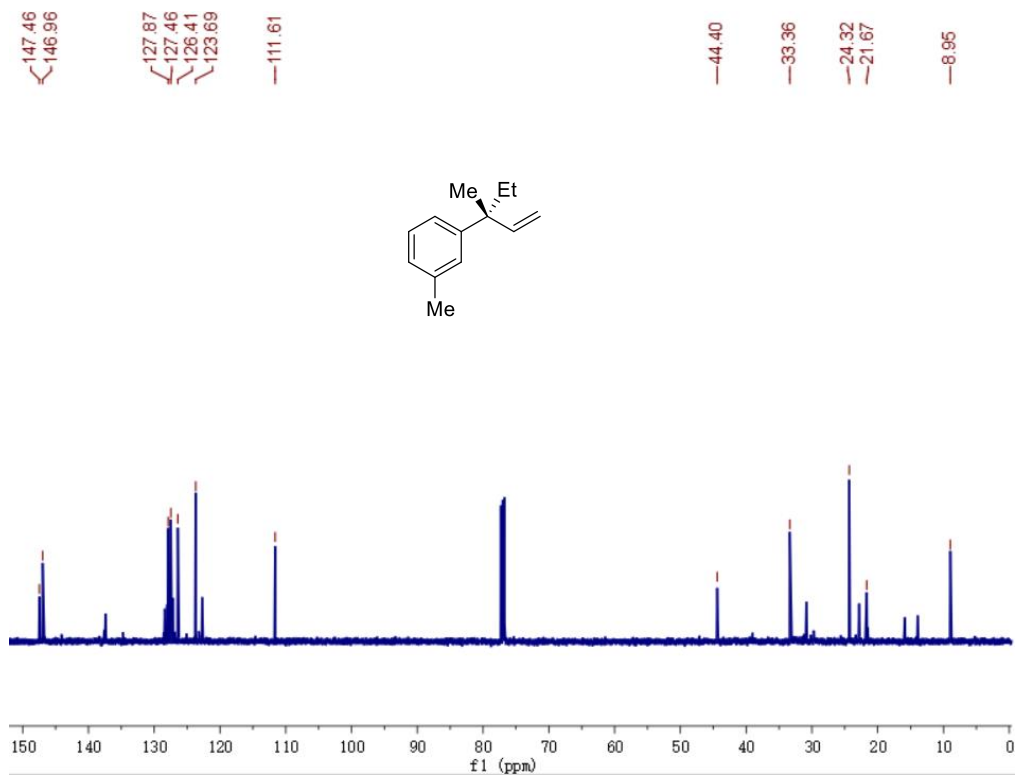

**Figure S73:** <sup>13</sup>C NMR (126 MHz, CDCl<sub>3</sub>) spectrum of **3ta** and **4ta**

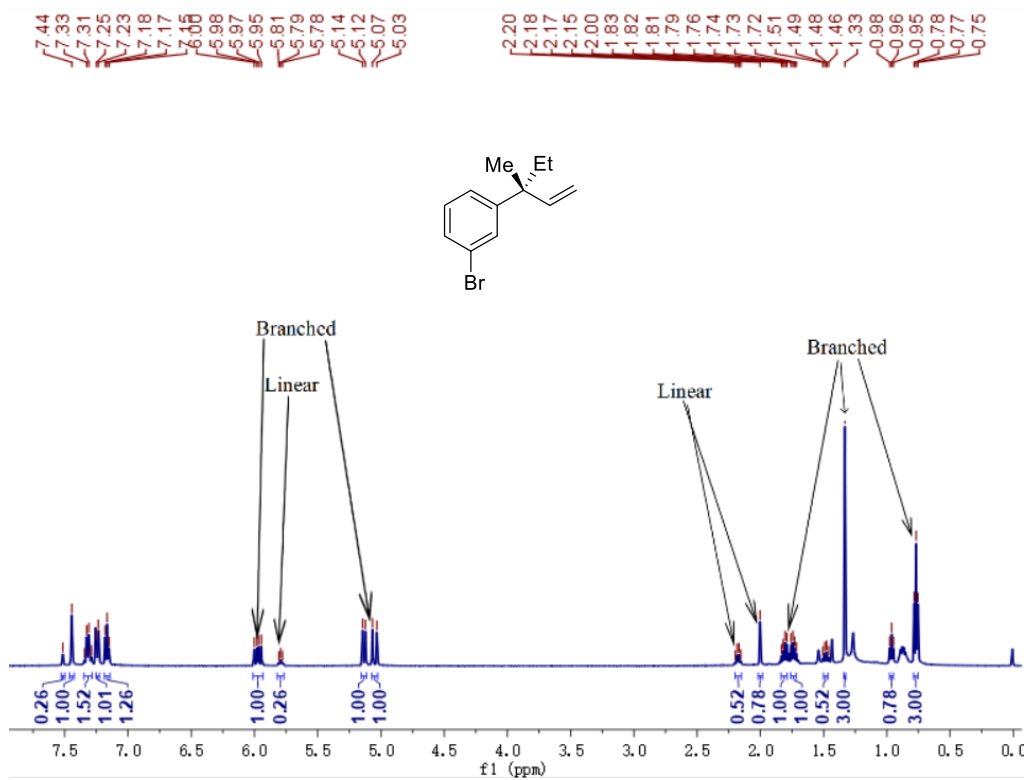

**Figure S74:** <sup>1</sup>H NMR (500 MHz, CDCl<sub>3</sub>) spectrum of **3ua** and **4ua**

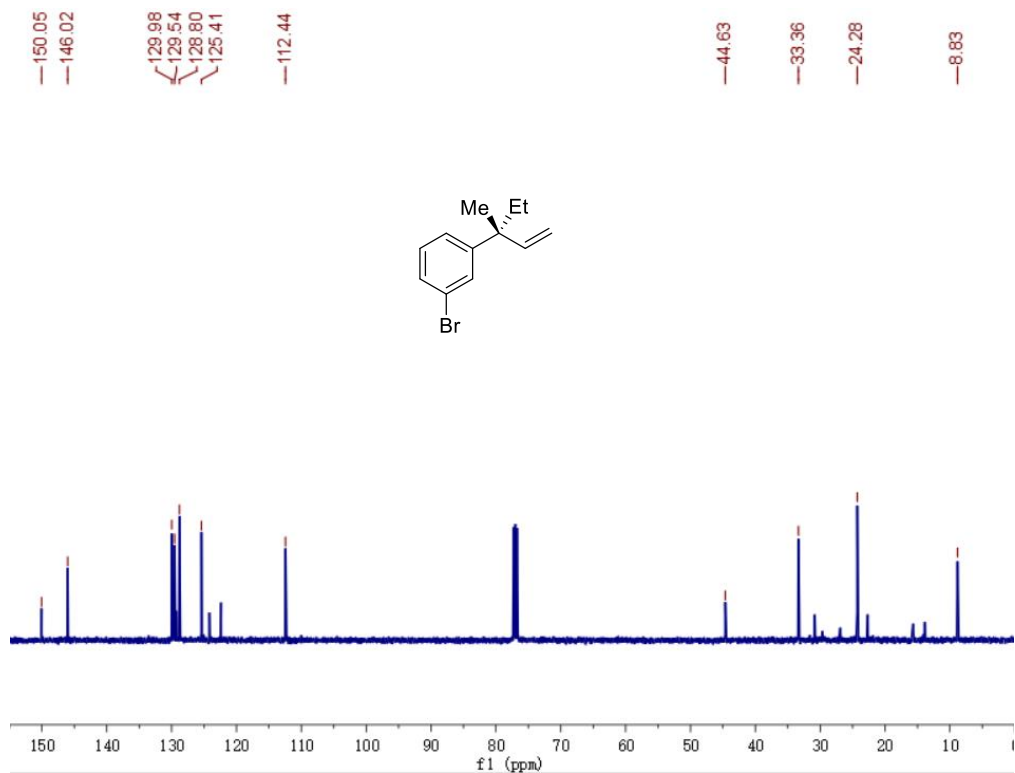

Figure S75:  $^{13}\text{C}$  NMR (126 MHz,  $\text{CDCl}_3$ ) spectrum of 3ua and 4ua

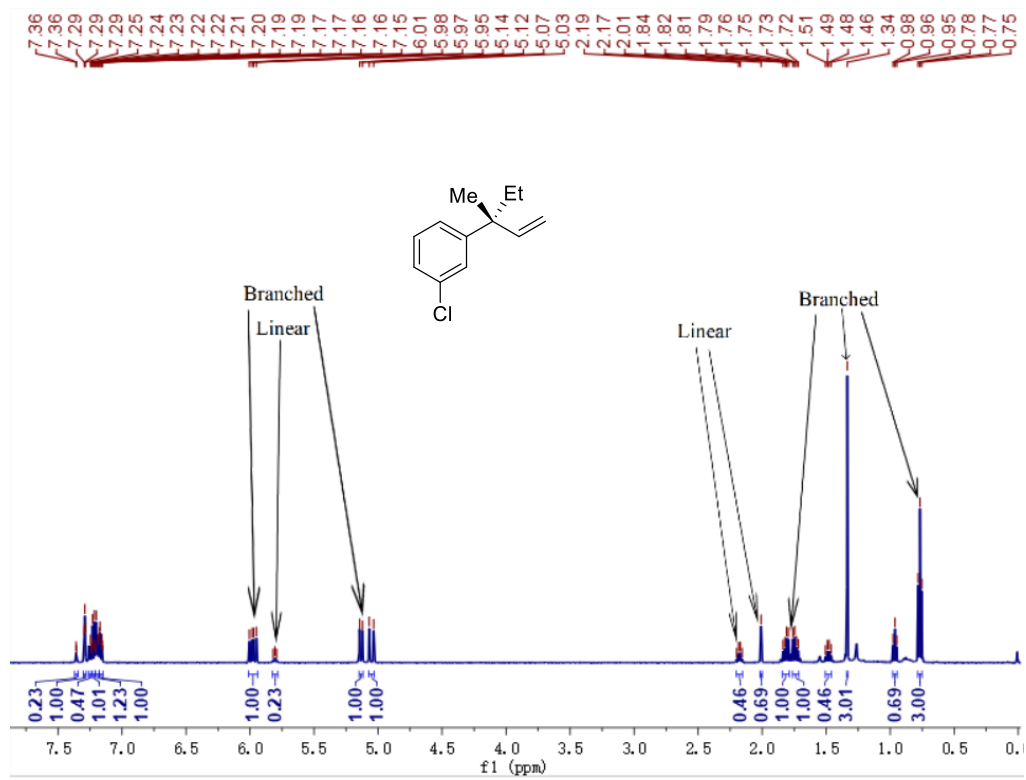

Figure S76:  $^1\text{H}$  NMR (500 MHz,  $\text{CDCl}_3$ ) spectrum of 3va and 4va

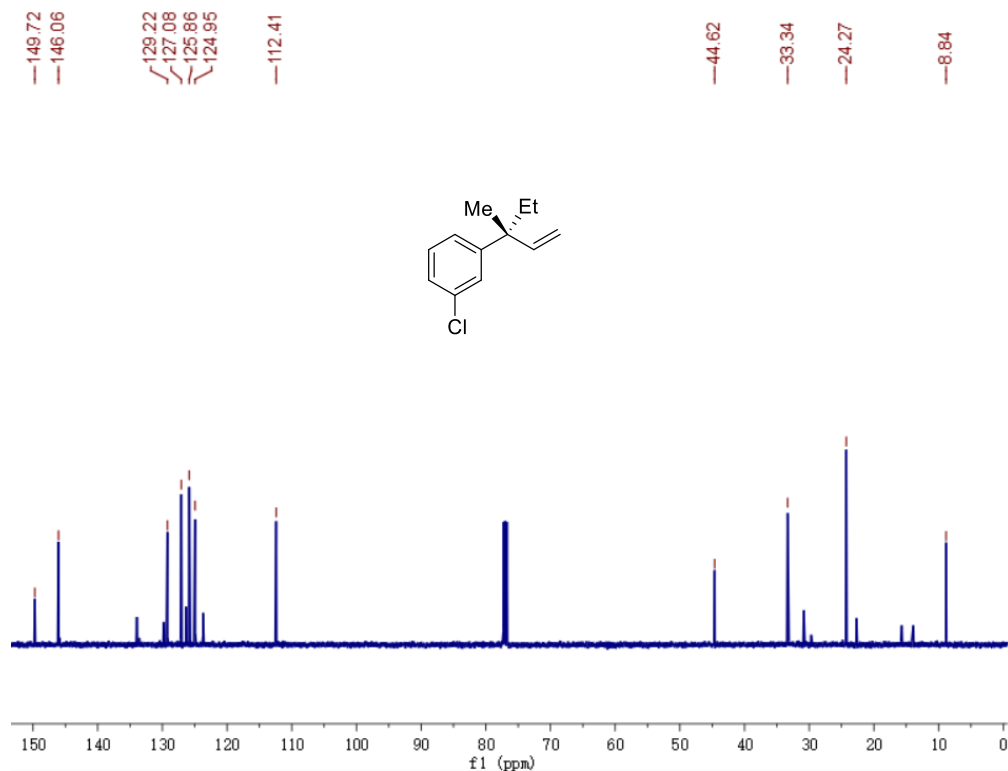

Figure S77: <sup>13</sup>C NMR (126 MHz, CDCl<sub>3</sub>) spectrum of 3va and 4va

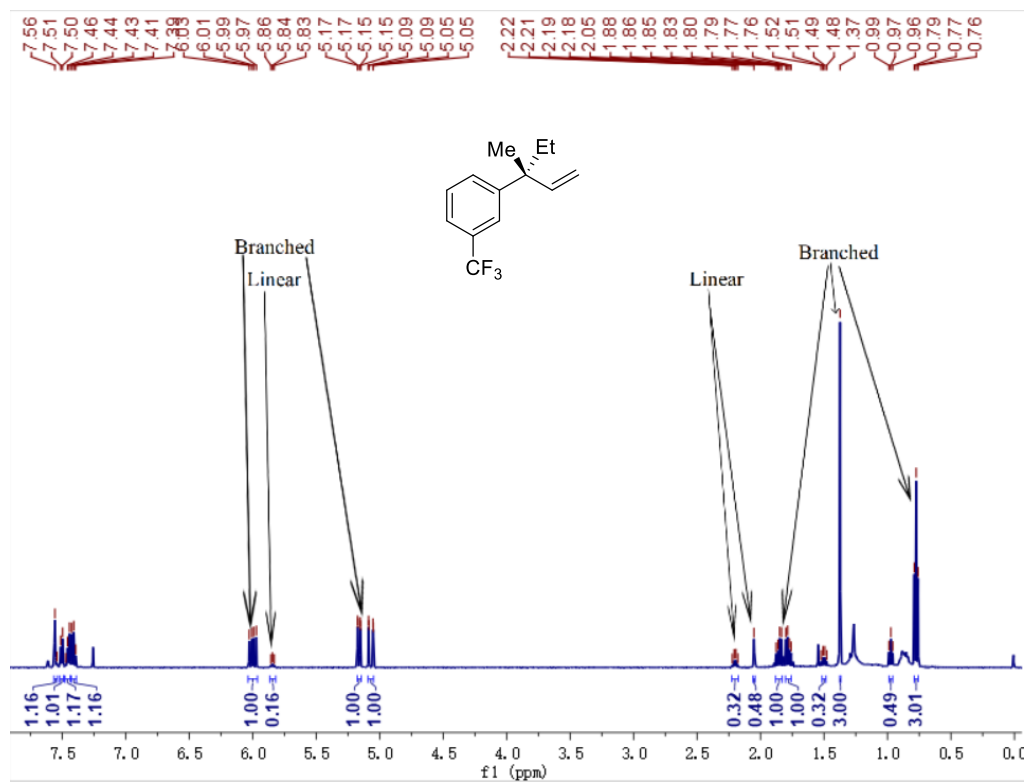

Figure S78: <sup>1</sup>H NMR (500 MHz, CDCl<sub>3</sub>) spectrum of 3wa and 4wa

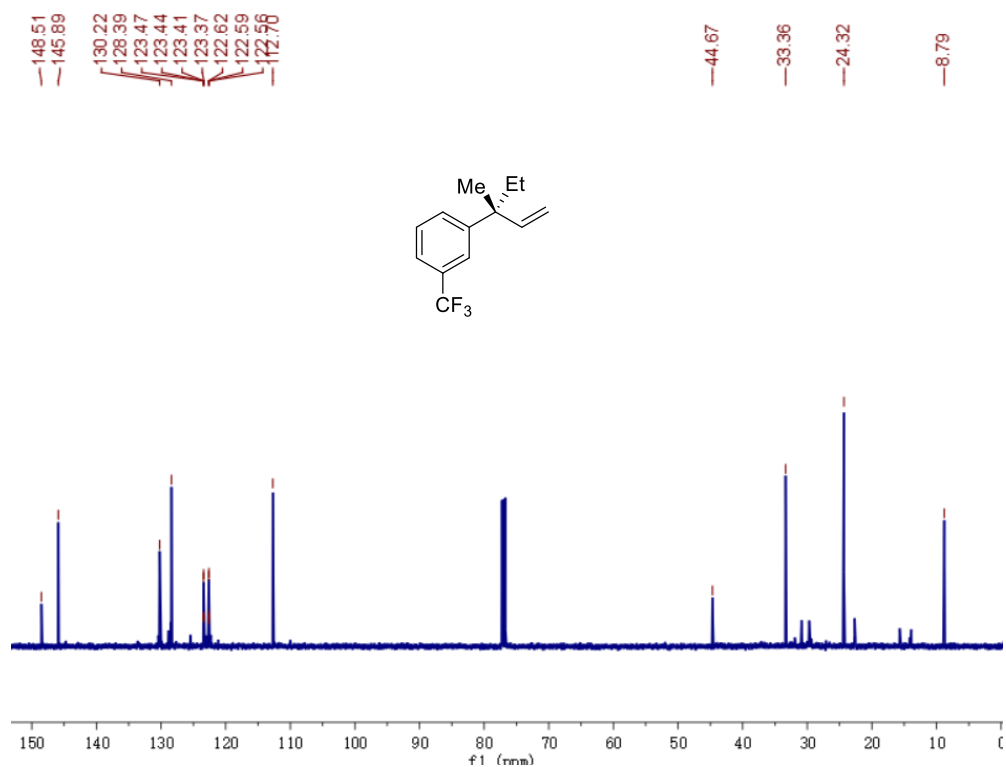

**Figure S79:** <sup>13</sup>C NMR (126 MHz, CDCl<sub>3</sub>) spectrum of **3wa** and **4wa**

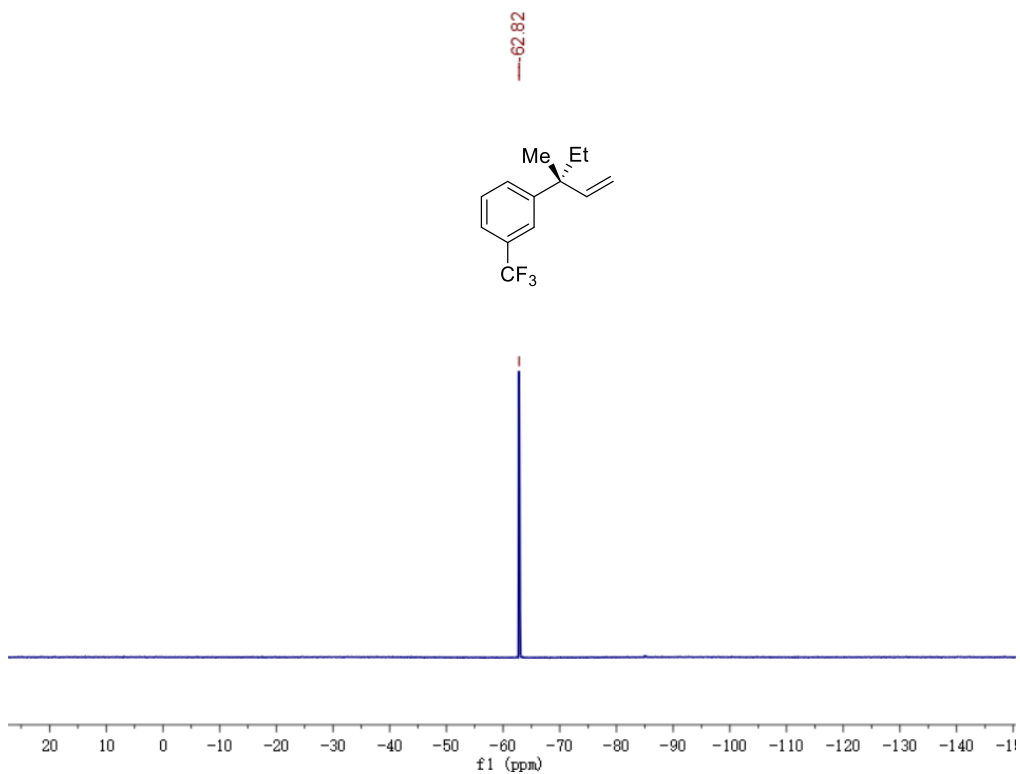

**Figure S80:** <sup>19</sup>F NMR (282 MHz, CDCl<sub>3</sub>) spectrum of **3wa** and **4wa**

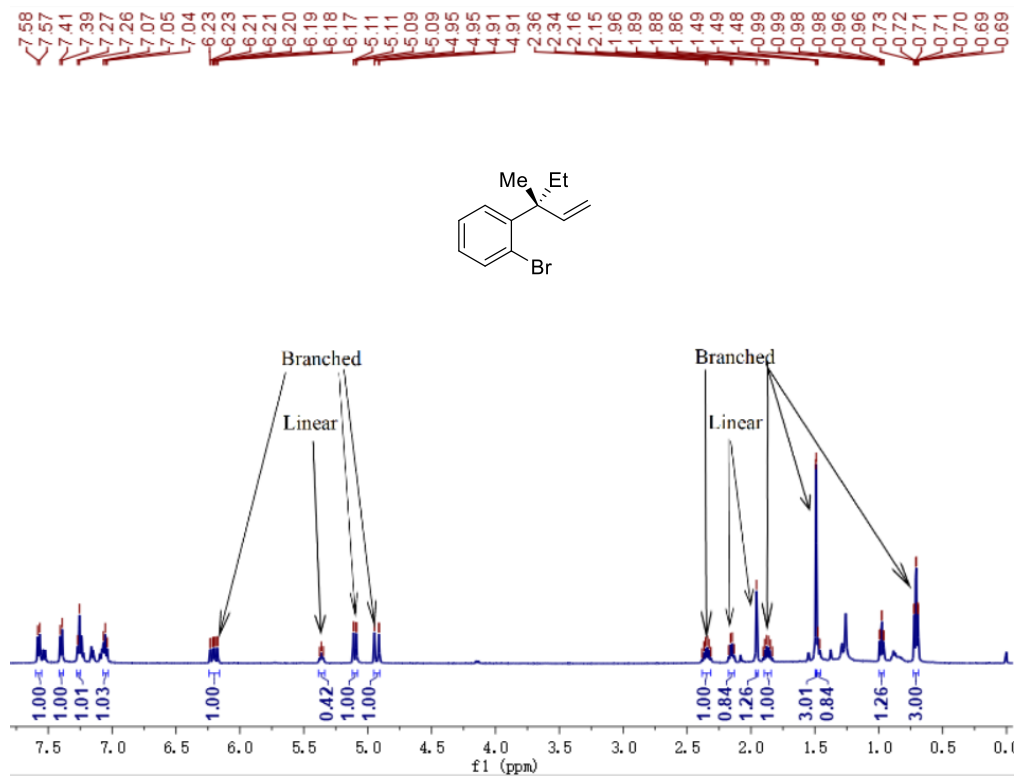

Figure S81: <sup>1</sup>H NMR (500 MHz, CDCl<sub>3</sub>) spectrum of **3xa** and **4xa**

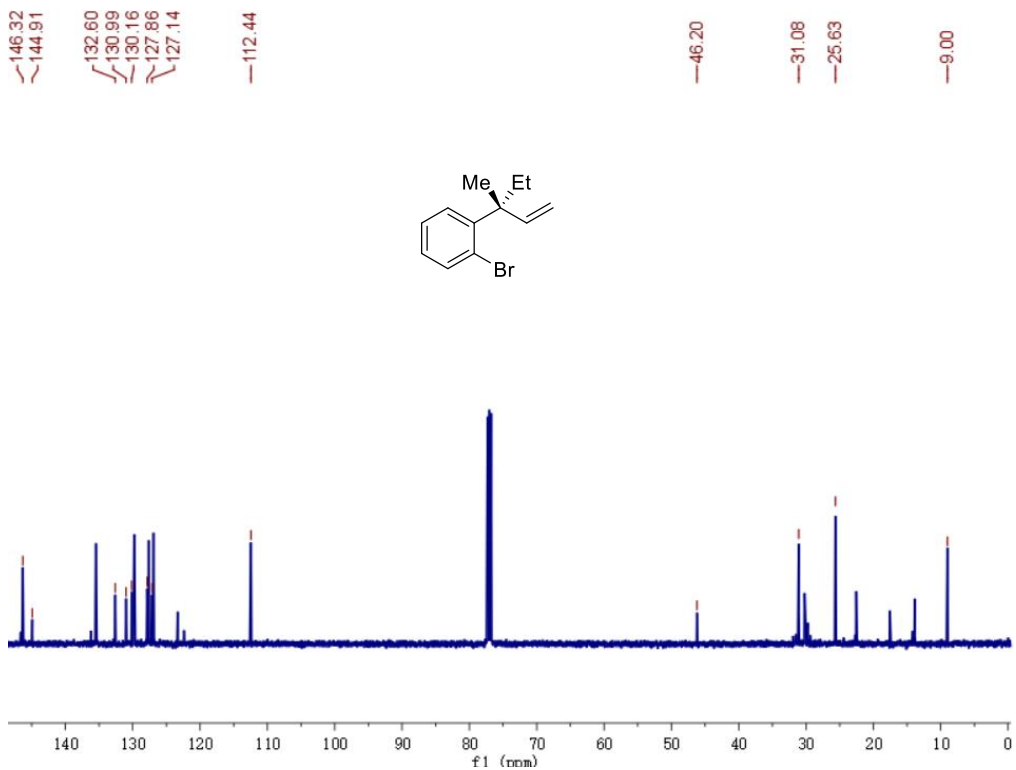

Figure S82: <sup>13</sup>C NMR (126 MHz, CDCl<sub>3</sub>) spectrum of **3xa** and **4xa**

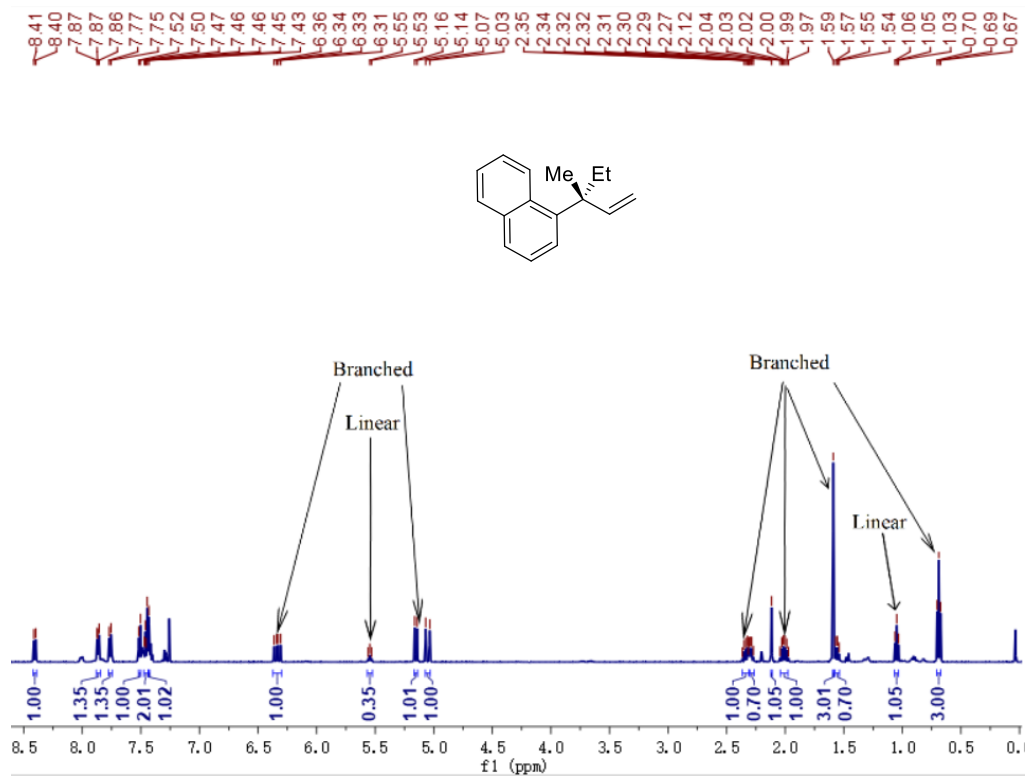

**Figure S83:** <sup>1</sup>H NMR (500 MHz, CDCl<sub>3</sub>) spectrum of **3ya** and **4ya**

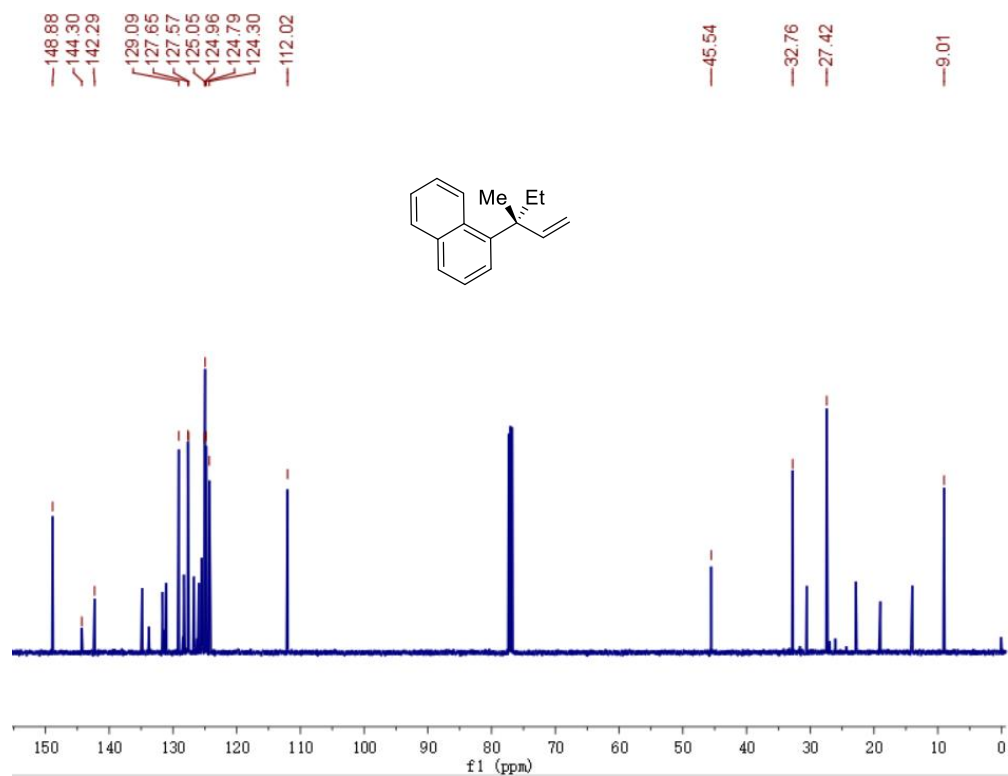

**Figure S84:** <sup>13</sup>C NMR (126 MHz, CDCl<sub>3</sub>) spectrum of **3ya** and **4ya**



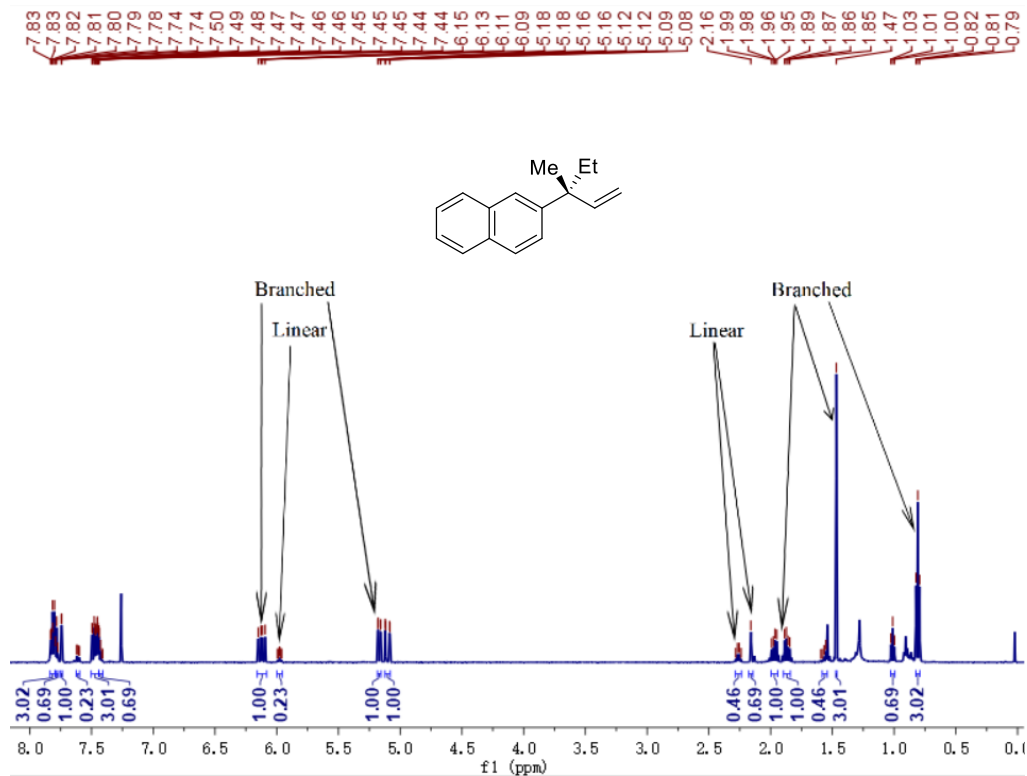

Figure S85: <sup>1</sup>H NMR (500 MHz, CDCl<sub>3</sub>) spectrum of 3za and 4za

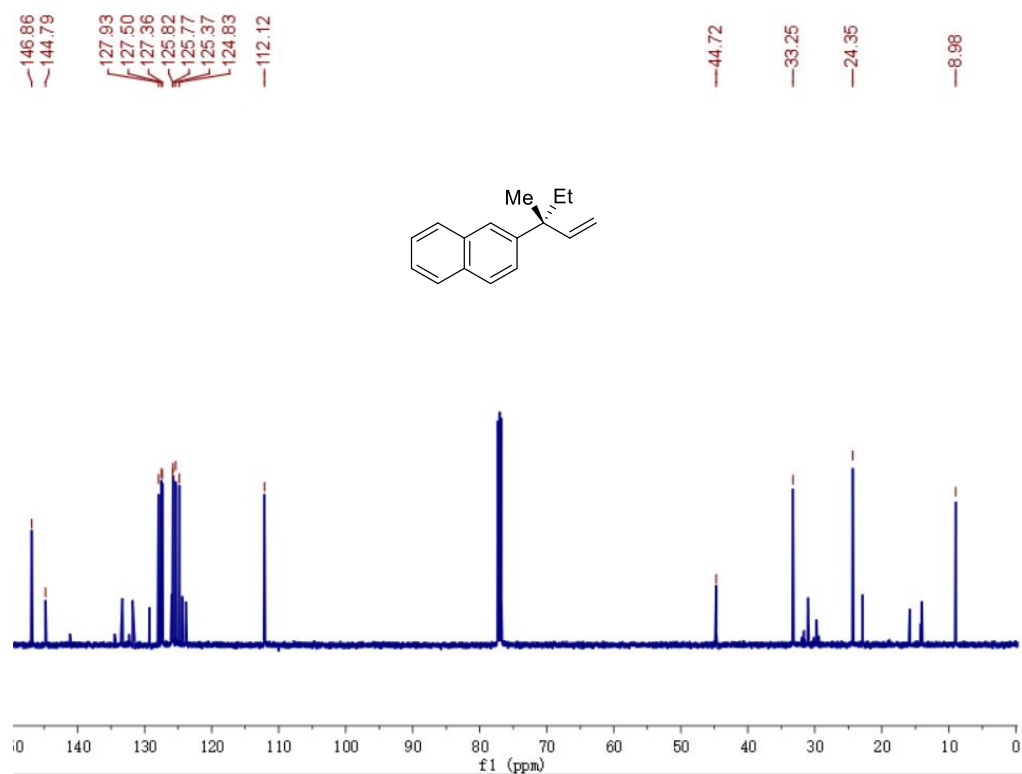

Figure S86: <sup>13</sup>C NMR (126 MHz, CDCl<sub>3</sub>) spectrum of 3za and 4za

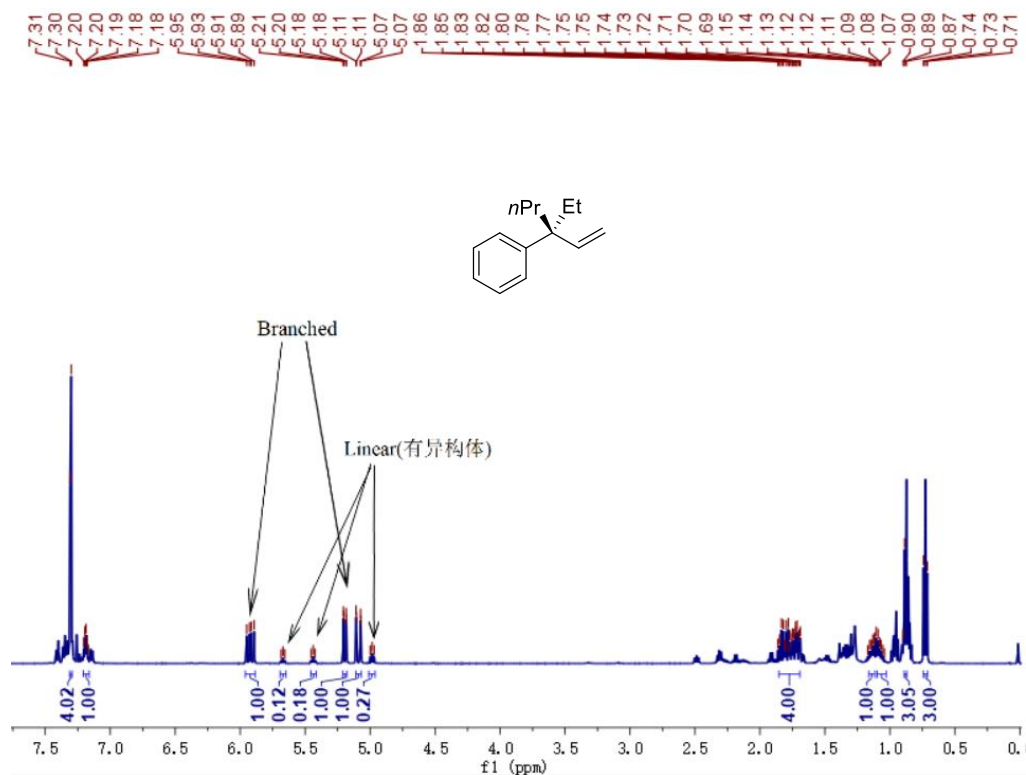

**Figure S87:** <sup>1</sup>H NMR (500 MHz, CDCl<sub>3</sub>) spectrum of **3x'a** and **4x'a**

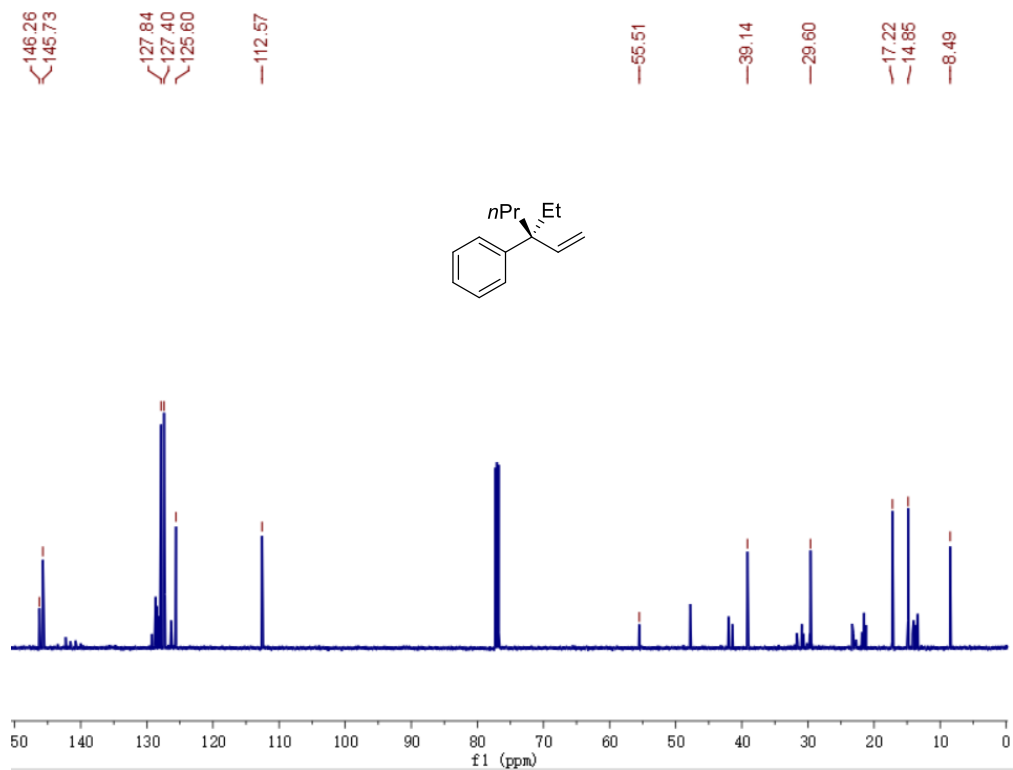

**Figure S88:** <sup>13</sup>C NMR (126 MHz, CDCl<sub>3</sub>) spectrum of **3x'a** and **4x'a**

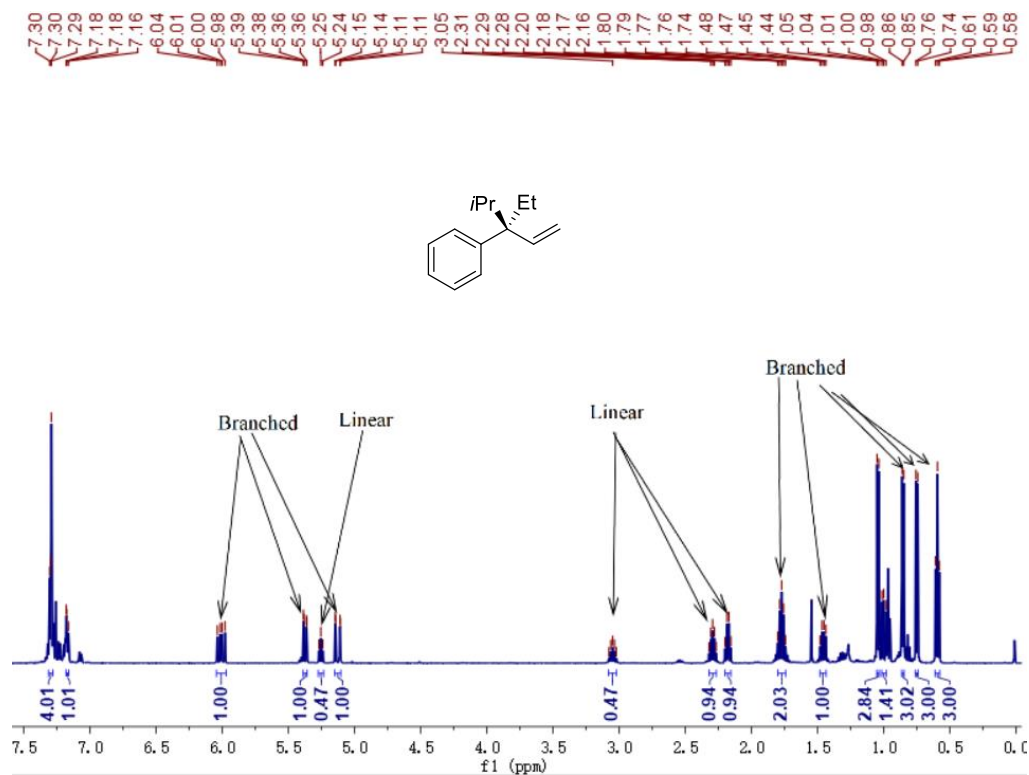

Figure S89: <sup>1</sup>H NMR (500 MHz, CDCl<sub>3</sub>) spectrum of 3y'a and 4y'a

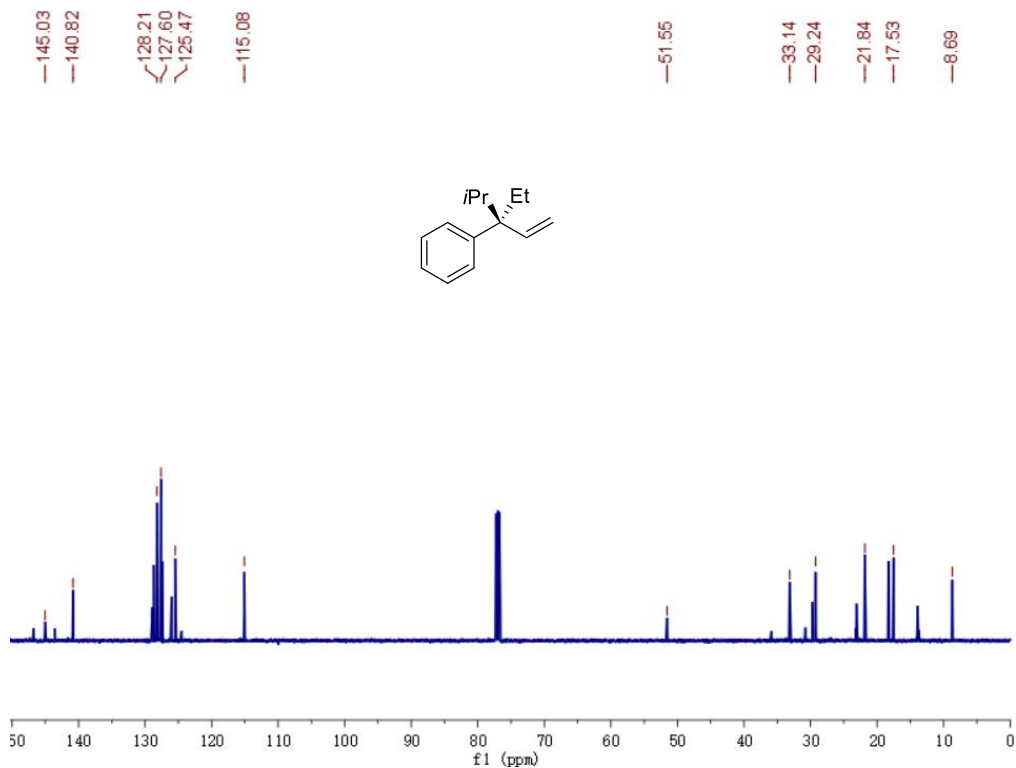

Figure S90: <sup>13</sup>C NMR (126 MHz, CDCl<sub>3</sub>) spectrum of 3y'a and 4y'a

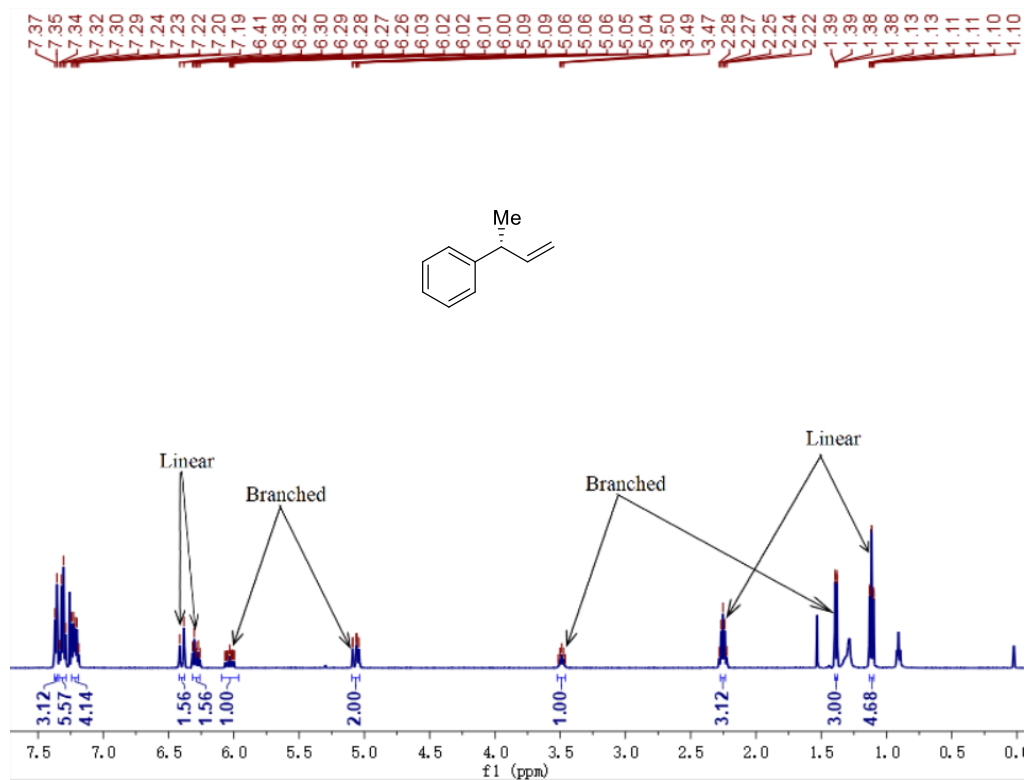

**Figure S91:** <sup>1</sup>H NMR (500 MHz, CDCl<sub>3</sub>) spectrum of **3ab** and **4ab**

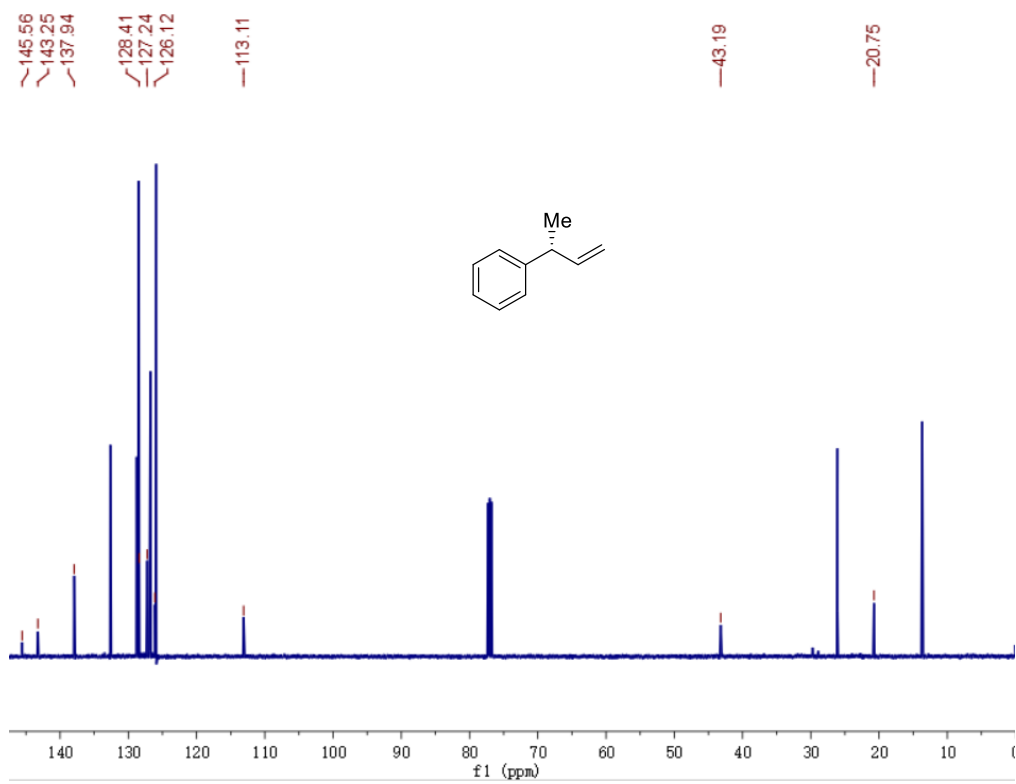

**Figure S92:** <sup>13</sup>C NMR (126 MHz, CDCl<sub>3</sub>) spectrum of **3ab** and **4ab**

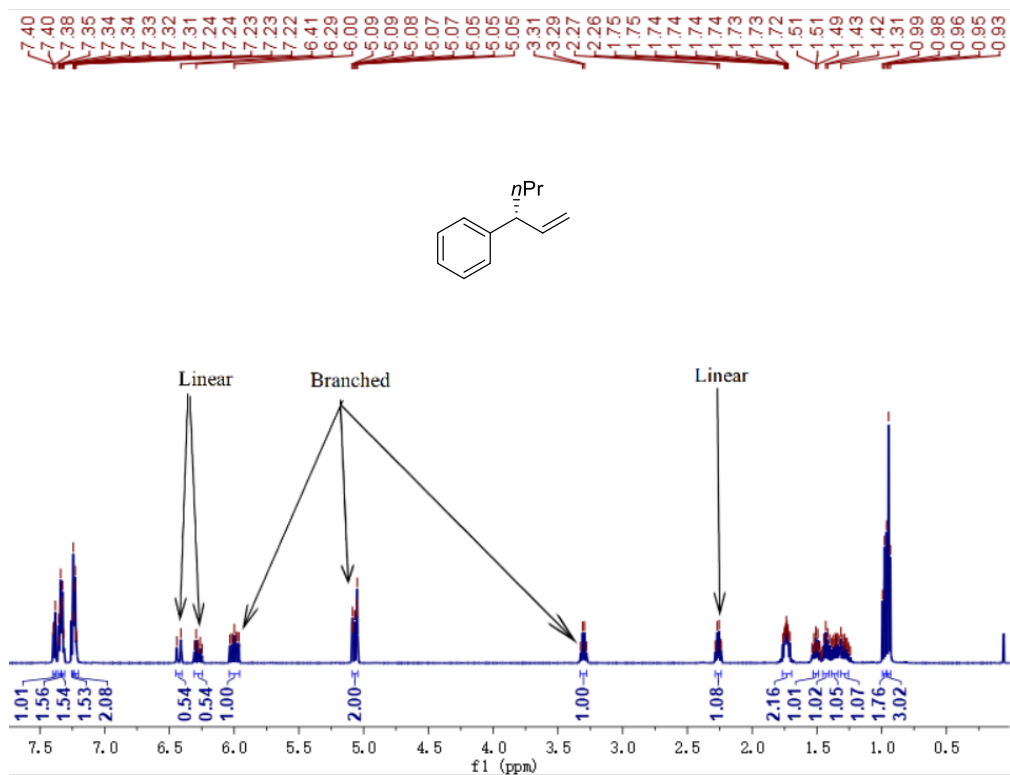

Figure S93:  $^1\text{H}$  NMR (500 MHz,  $\text{CDCl}_3$ ) spectrum of **3ac** and **4ac**

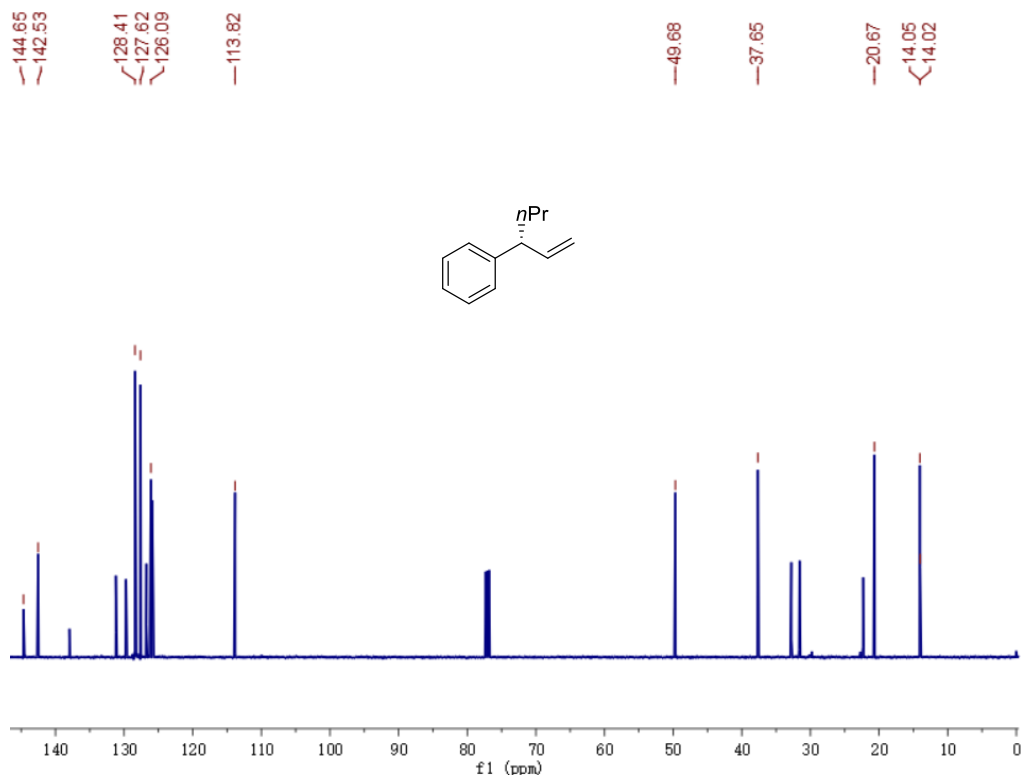

Figure S94:  $^{13}\text{C}$  NMR (126 MHz,  $\text{CDCl}_3$ ) spectrum of **3ac** and **4ac**

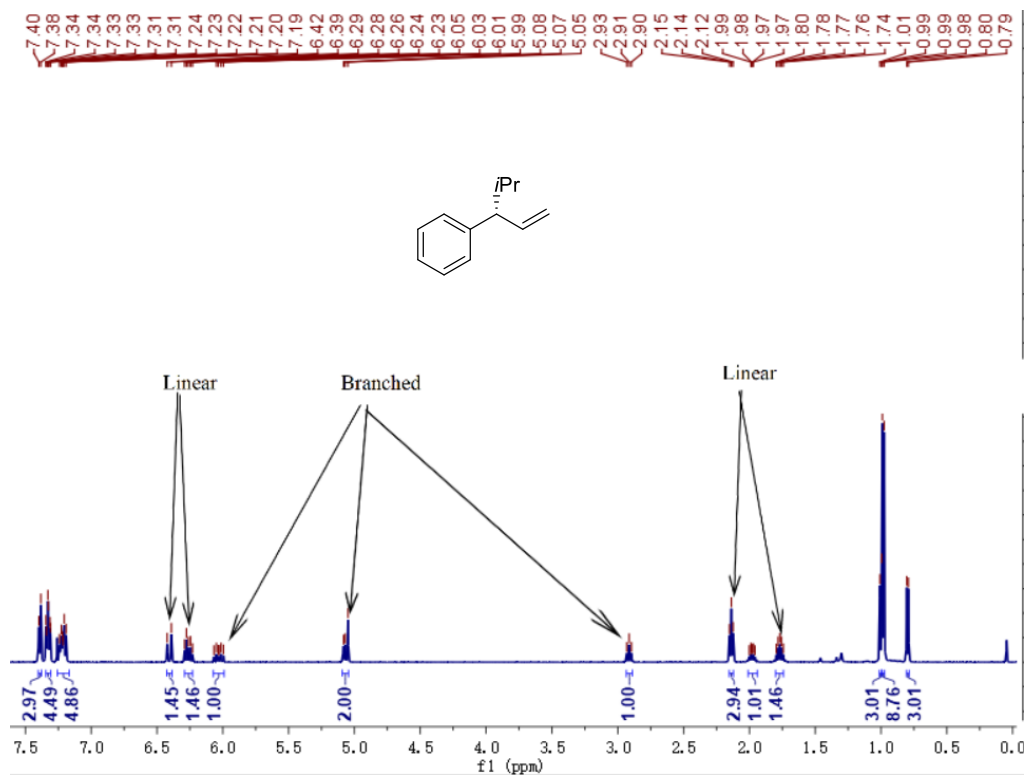

**Figure S95:** <sup>1</sup>H NMR (500 MHz, CDCl<sub>3</sub>) spectrum of **3ad** and **4ad**

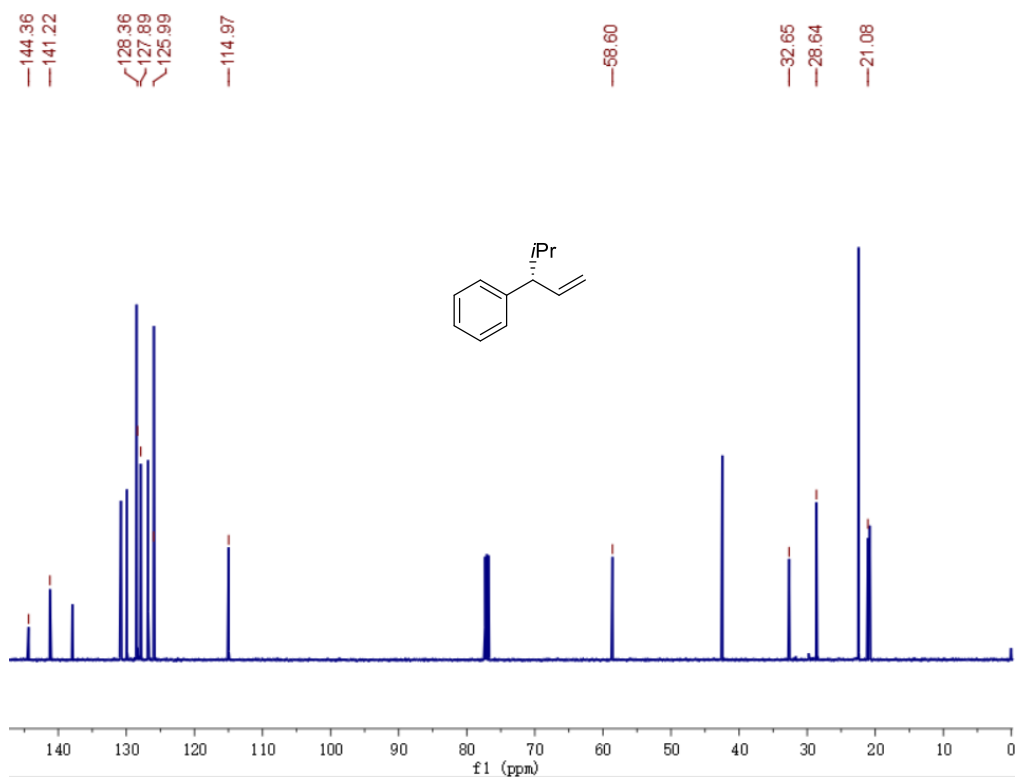

**Figure S96:** <sup>13</sup>C NMR (126 MHz, CDCl<sub>3</sub>) spectrum of **3ad** and **4ad**

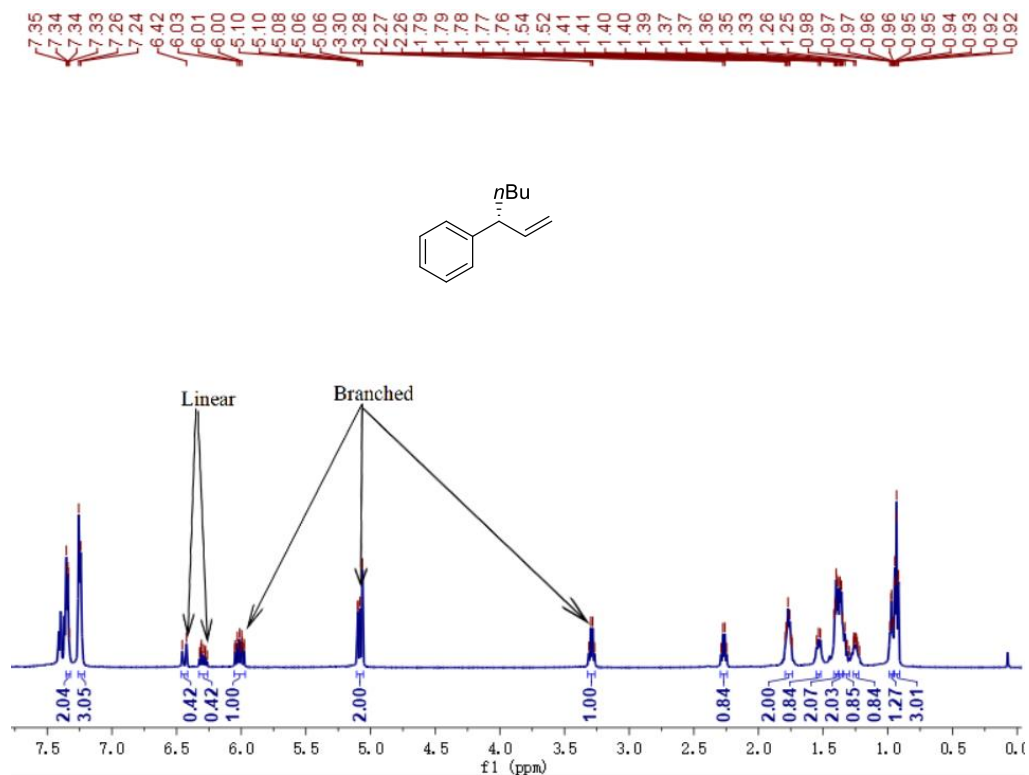

**Figure S97:** <sup>1</sup>H NMR (500 MHz, CDCl<sub>3</sub>) spectrum of **3ae** and **4ae**

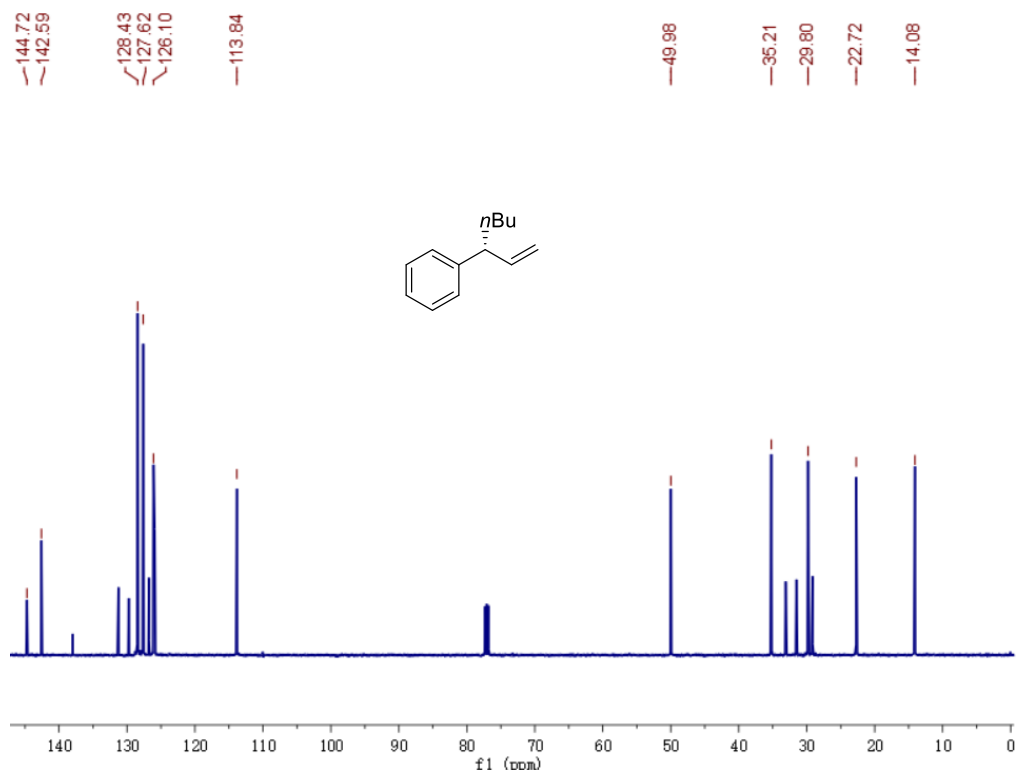

**Figure S98:** <sup>13</sup>C NMR (126 MHz, CDCl<sub>3</sub>) spectrum of **3ae** and **4ae**

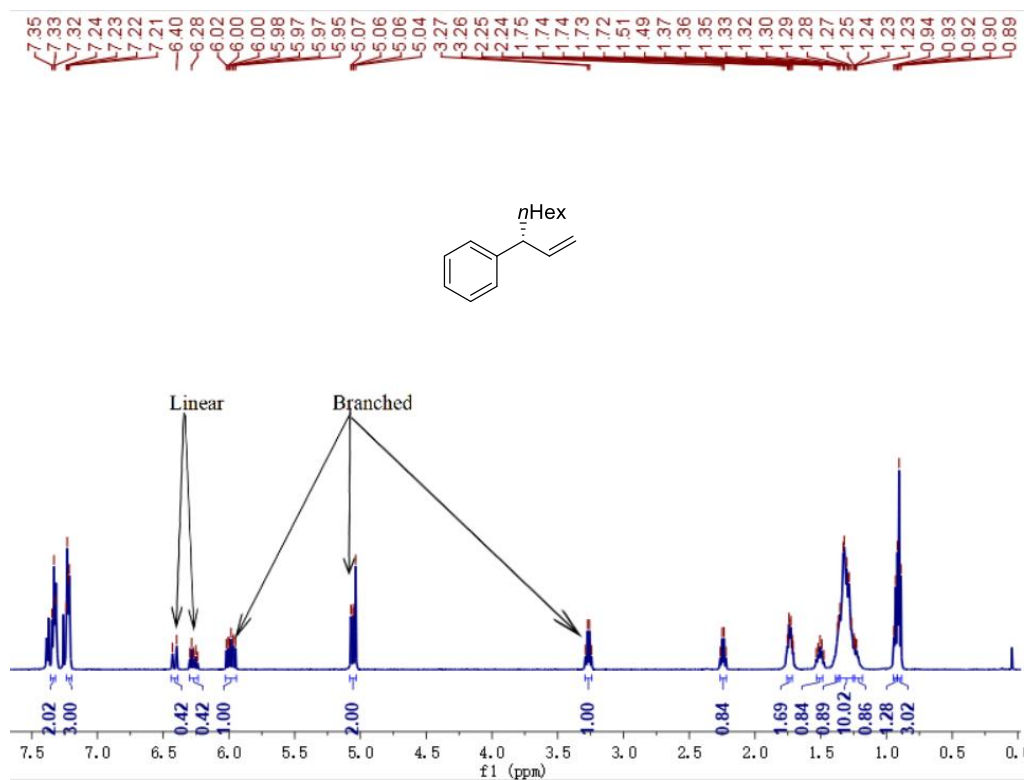

Figure S99:  $^1\text{H}$  NMR (500 MHz,  $\text{CDCl}_3$ ) spectrum of **3af** and **4af**

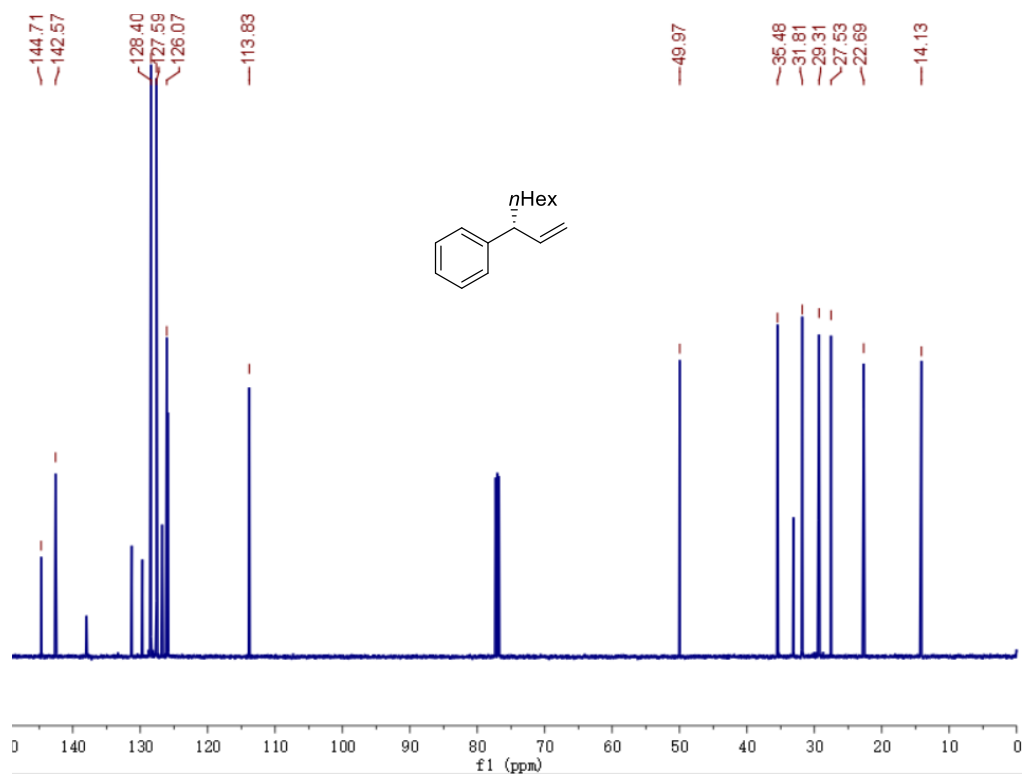

Figure S100:  $^{13}\text{C}$  NMR (126 MHz,  $\text{CDCl}_3$ ) spectrum of **3af** and **4af**



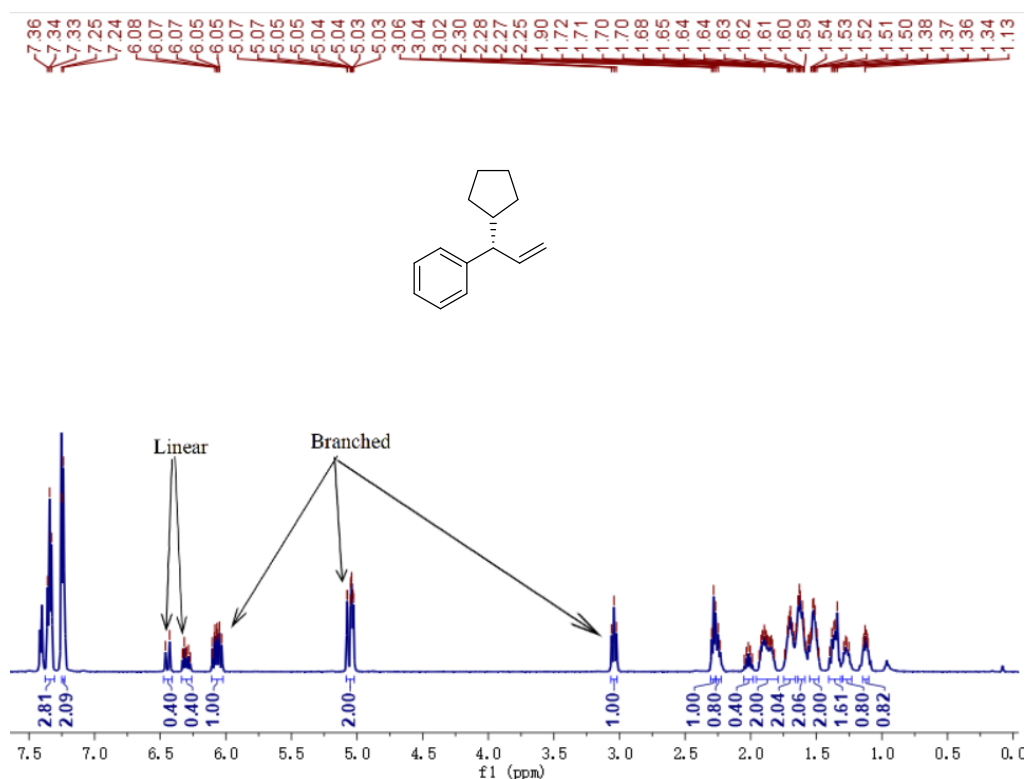

**Figure S101:** <sup>1</sup>H NMR (500 MHz, CDCl<sub>3</sub>) spectrum of **3ag** and **4ag**

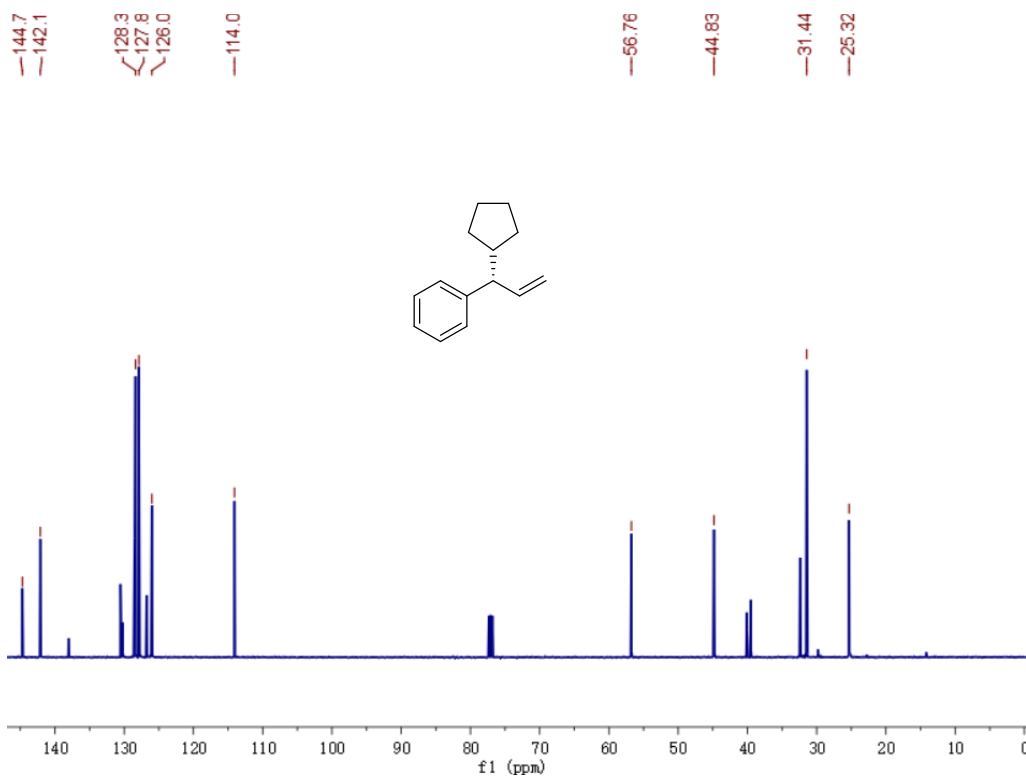

**Figure S102:** <sup>13</sup>C NMR (126 MHz, CDCl<sub>3</sub>) spectrum of **3ag** and **4ag**

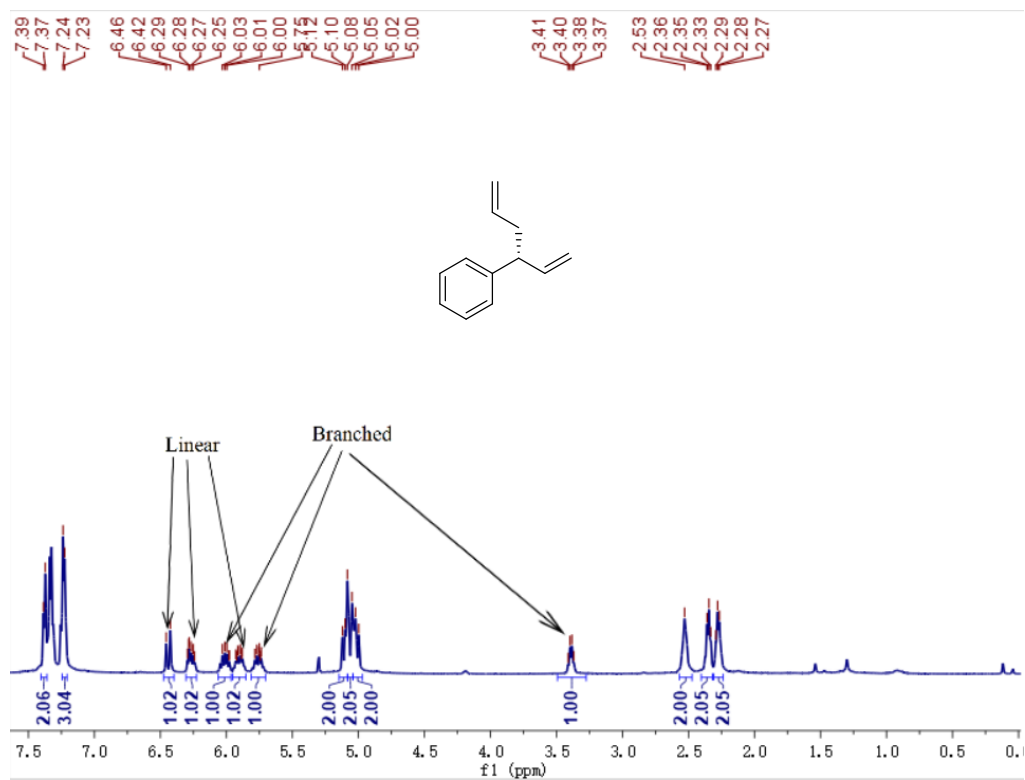

**Figure S103:** <sup>1</sup>H NMR (500 MHz, CDCl<sub>3</sub>) spectrum of **3ah** and **4ah**

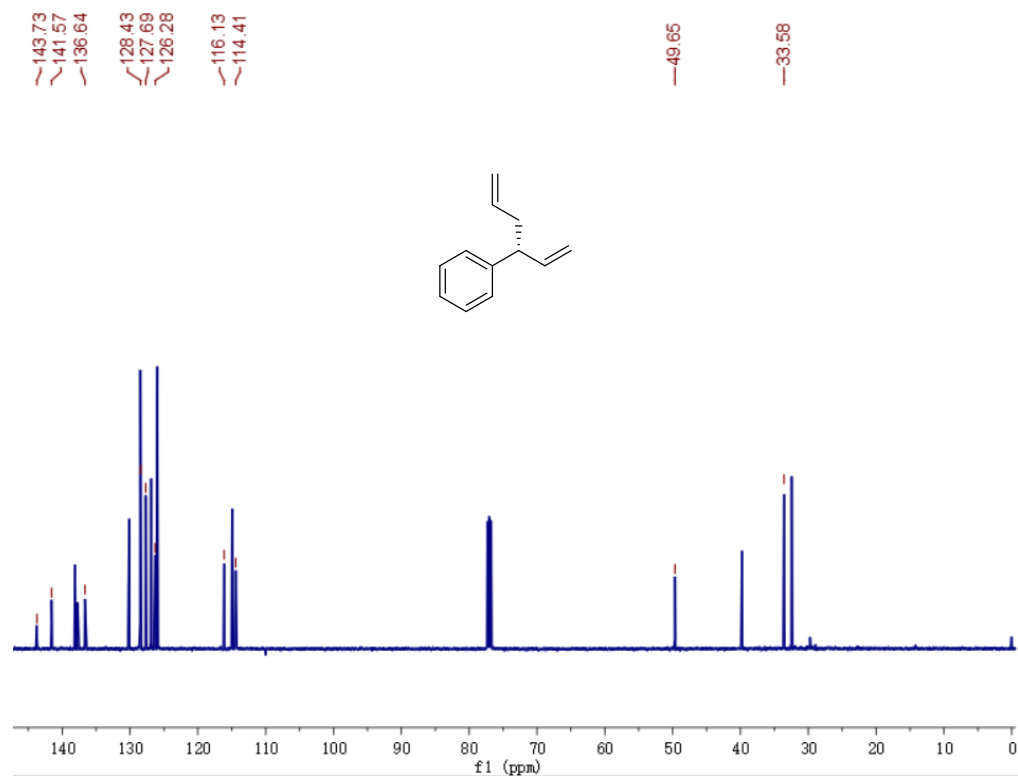

**Figure S104:** <sup>13</sup>C NMR (126 MHz, CDCl<sub>3</sub>) spectrum of **3ah** and **4ah**

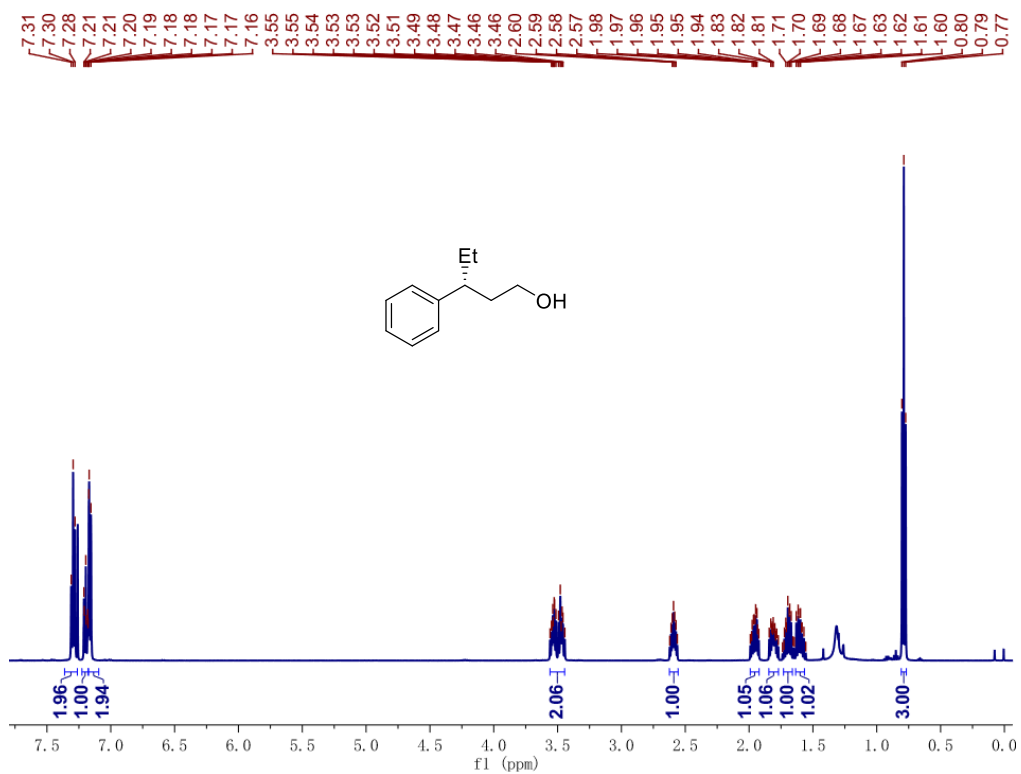

Figure S105: <sup>1</sup>H NMR (500 MHz, CDCl<sub>3</sub>) spectrum of 5a

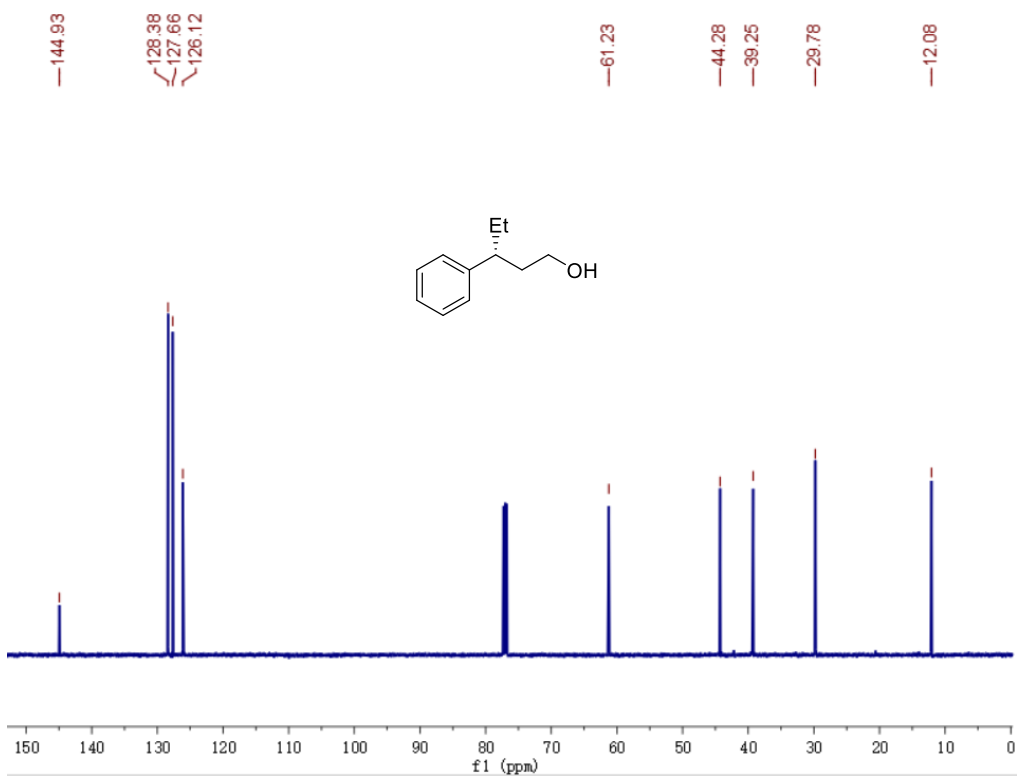

Figure S106: <sup>13</sup>C NMR (126 MHz, CDCl<sub>3</sub>) spectrum of 5a

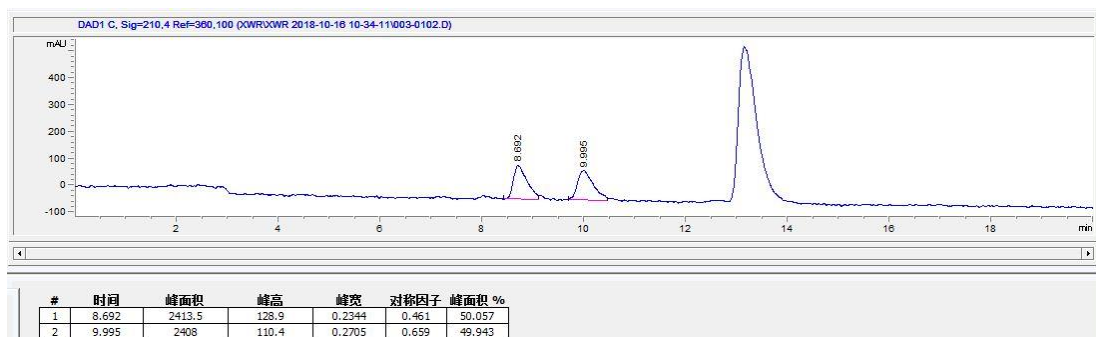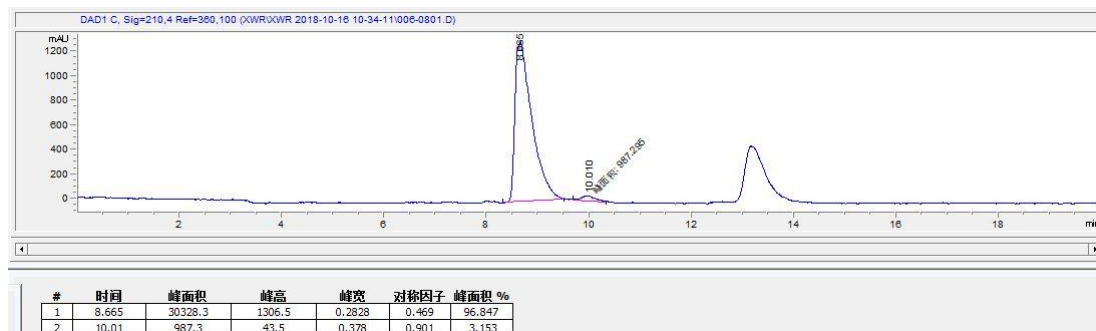

Figure S107: HPLC chromatographs of 3aa

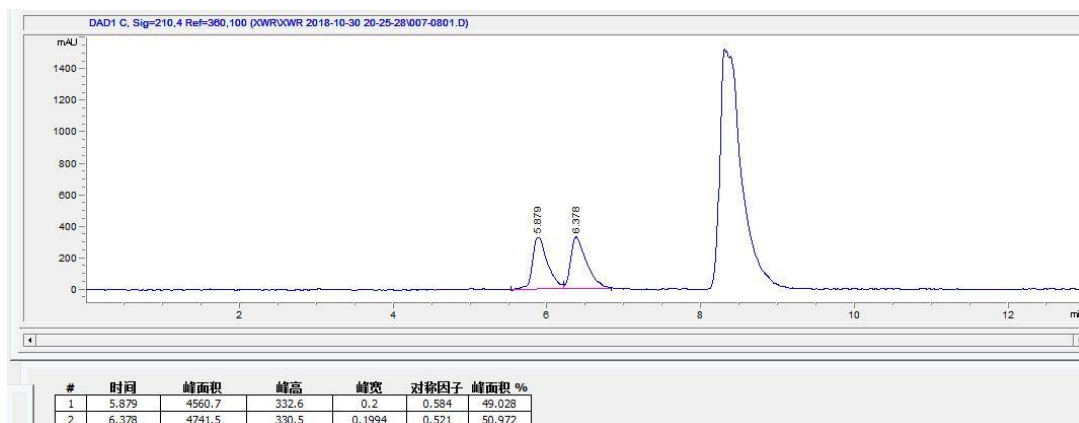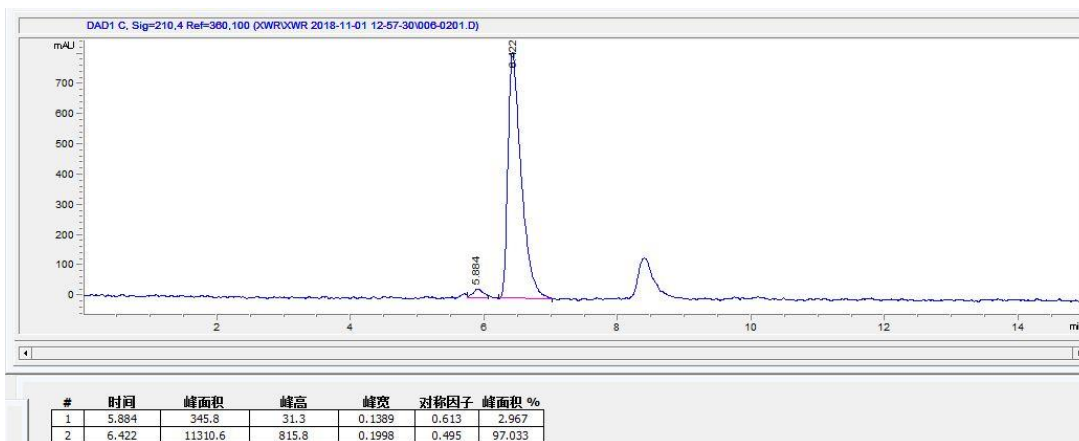

Figure S108: HPLC chromatographs of 3ba

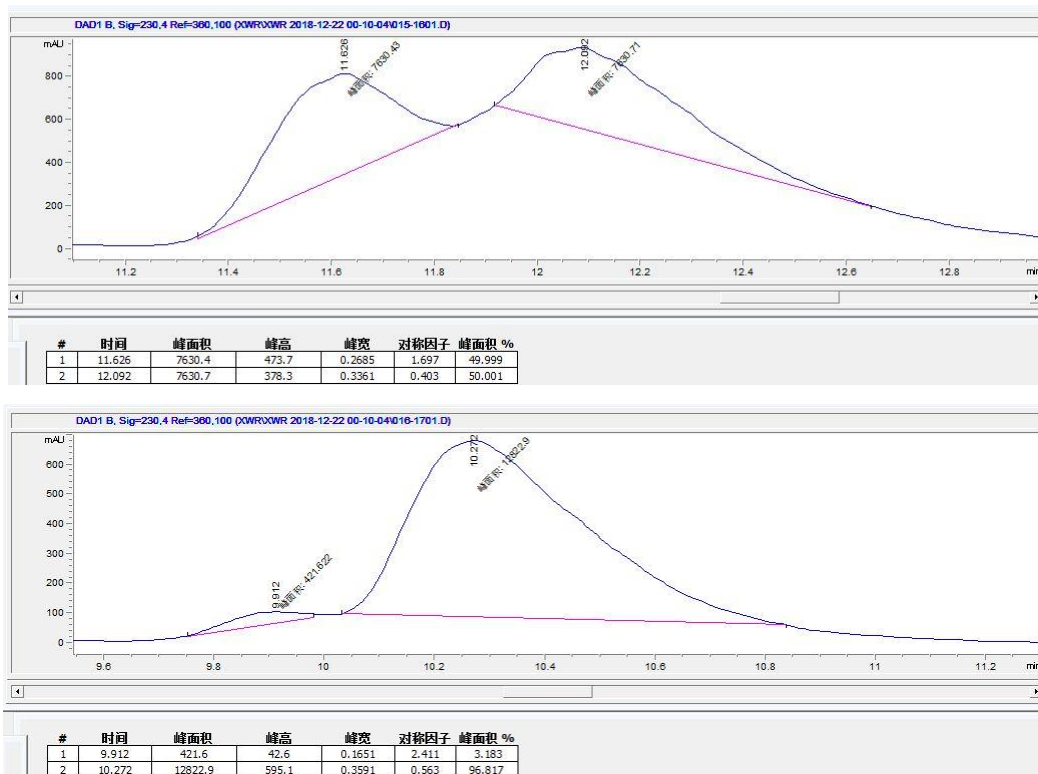

Figure S109: HPLC chromatographs of **3ca**

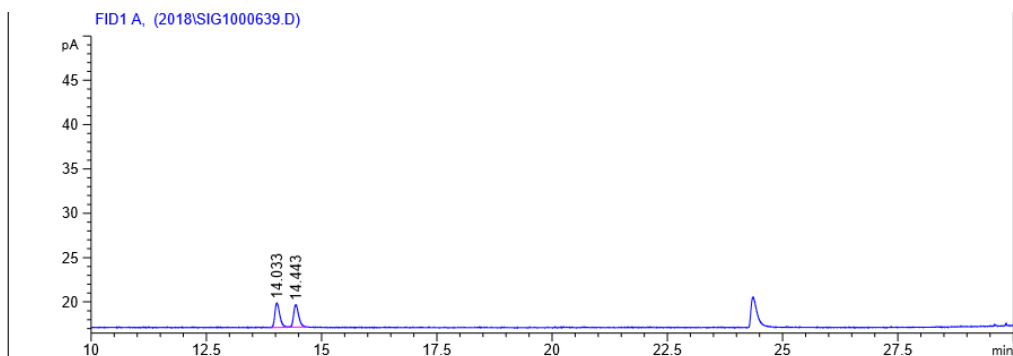

| Peak # | RetTime [min] | Type | Width [min] | Area [pA*s] | Height [pA] | Area %   |
|--------|---------------|------|-------------|-------------|-------------|----------|
| 1      | 14.033        | BB   | 0.1159      | 20.26668    | 2.75307     | 51.52841 |
| 2      | 14.443        | BB   | 0.1192      | 19.06440    | 2.52065     | 48.47159 |

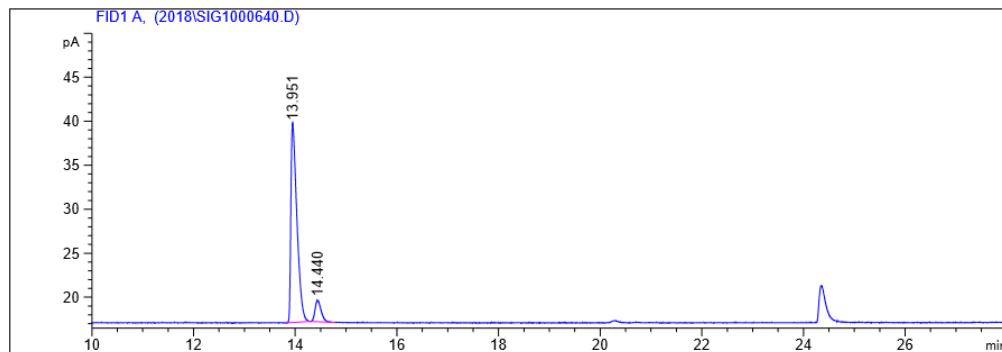

| Peak # | RetTime [min] | Type | Width [min] | Area [pA*s] | Height [pA] | Area %   |
|--------|---------------|------|-------------|-------------|-------------|----------|
| 1      | 13.951        | BB   | 0.1245      | 186.31029   | 22.52155    | 90.25405 |
| 2      | 14.440        | BB   | 0.1283      | 20.11844    | 2.43716     | 9.74595  |

**Figure S110: HPLC chromatographs of 3da**

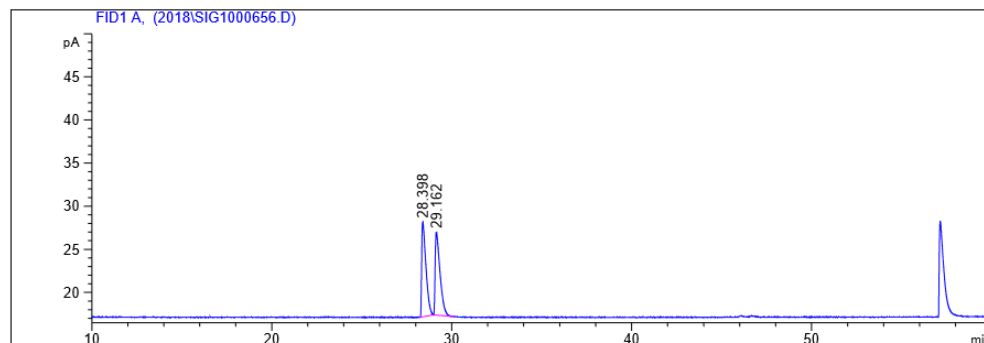

| Peak # | RetTime [min] | Type | Width [min] | Area [pA*s] | Height [pA] | Area %   |
|--------|---------------|------|-------------|-------------|-------------|----------|
| 1      | 28.398        | BB   | 0.2233      | 180.40466   | 11.00275    | 49.89987 |
| 2      | 29.162        | BB   | 0.2501      | 181.12866   | 9.59916     | 50.10013 |

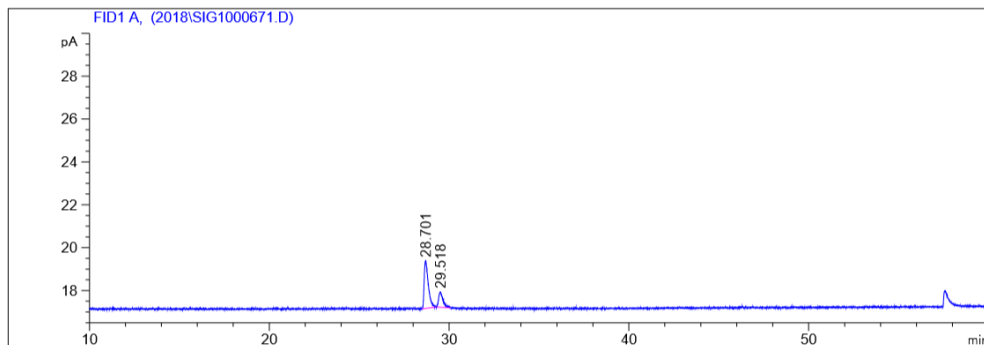

| Peak # | RetTime [min] | Type | Width [min] | Area [pA*s] | Height [pA] | Area %   |
|--------|---------------|------|-------------|-------------|-------------|----------|
| 1      | 28.701        | BB   | 0.2268      | 34.88015    | 2.20212     | 74.39054 |
| 2      | 29.518        | BB   | 0.2120      | 12.00773    | 7.00317e-1  | 25.60946 |

**Figure S111: HPLC chromatographs of 3ea**

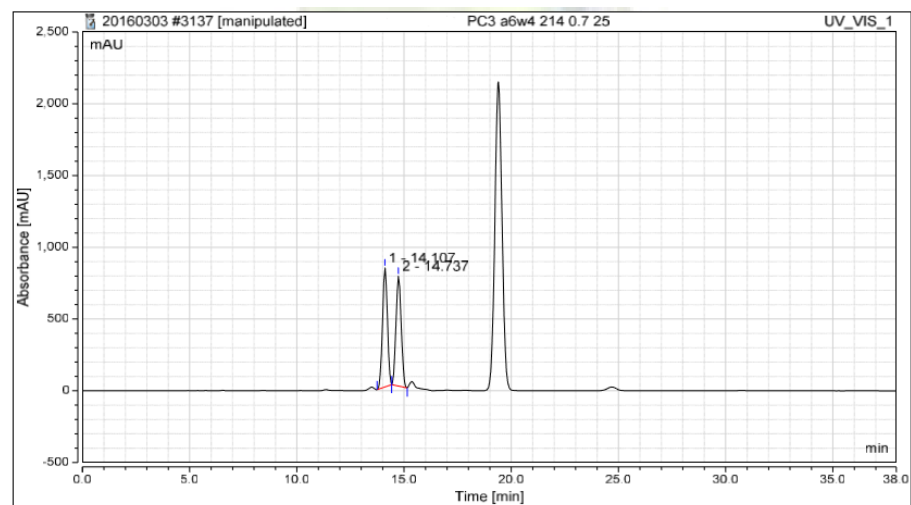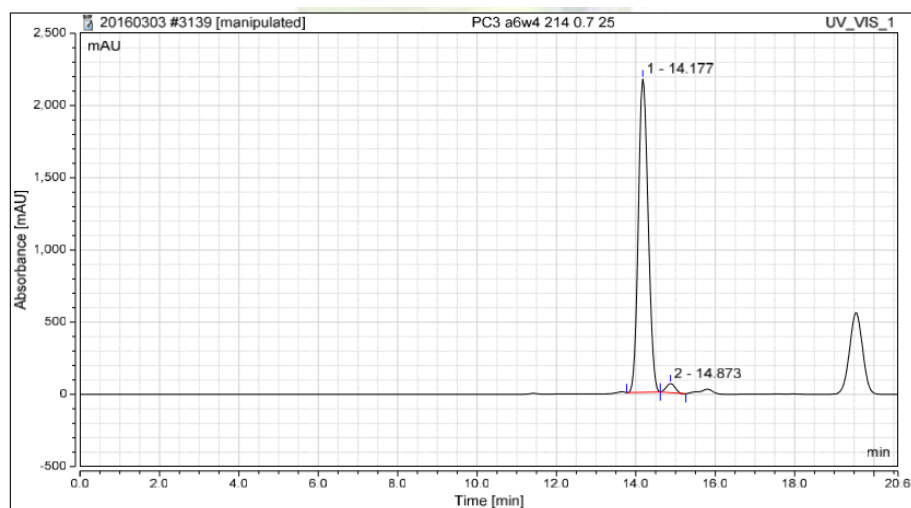

**Figure S112: HPLC chromatographs of 3fa**

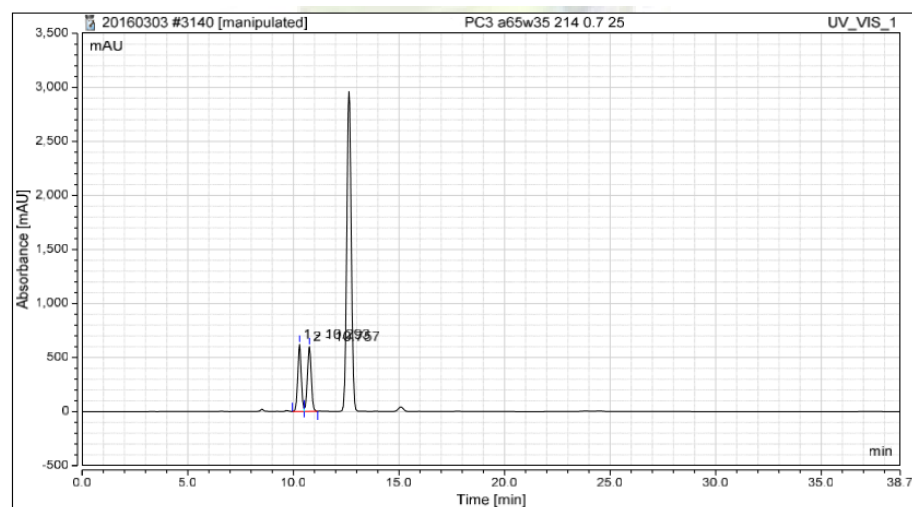

#### Integration Results

| No. | Retention Time<br>min | Retention Time<br>min | Area<br>mAU*min | Height<br>mAU | Relative Area<br>% |
|-----|-----------------------|-----------------------|-----------------|---------------|--------------------|
| 1   | 10                    | 10.293                | 119.357         | 622.507       | 48.93              |
| 2   | 11                    | 10.757                | 124.580         | 600.002       | 51.07              |

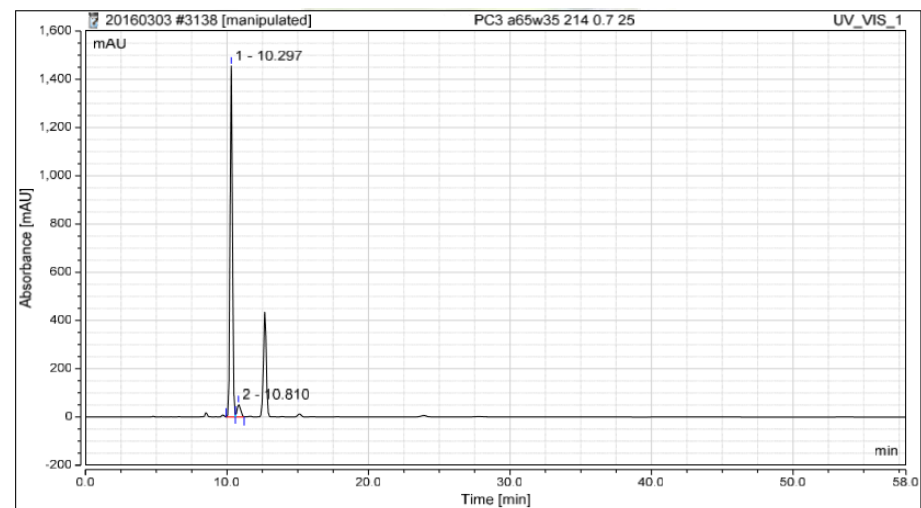

#### Integration Results

| No. | Retention Time<br>min | Retention Time<br>min | Area<br>mAU*min | Height<br>mAU | Relative Area<br>% |
|-----|-----------------------|-----------------------|-----------------|---------------|--------------------|
| 1   | 10                    | 10.297                | 281.592         | 1455.817      | 94.80              |
| 2   | 11                    | 10.810                | 15.442          | 51.750        | 5.20               |

Figure S113: HPLC chromatographs of **3ga**

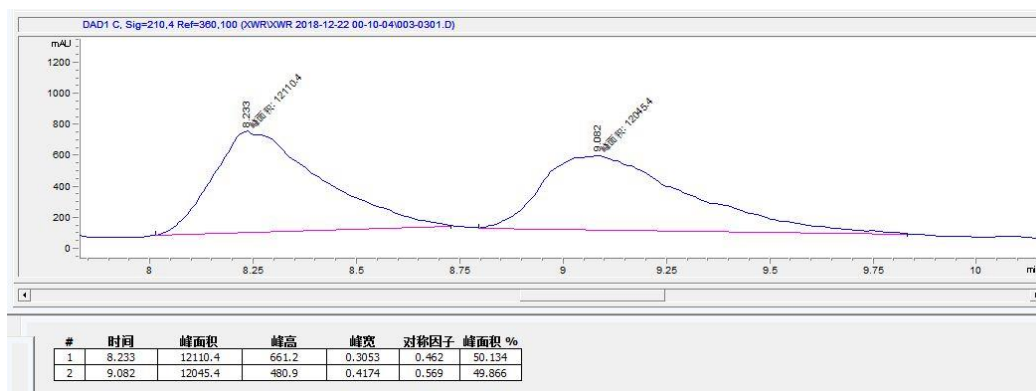



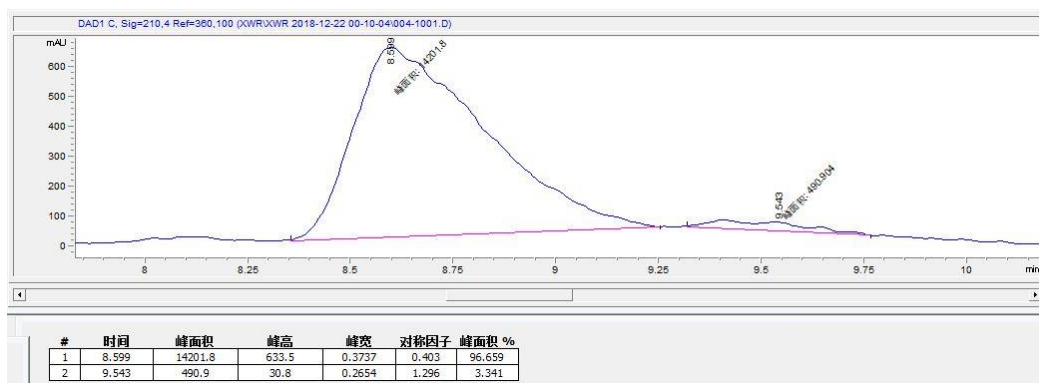

Figure S114: HPLC chromatographs of **3ha**

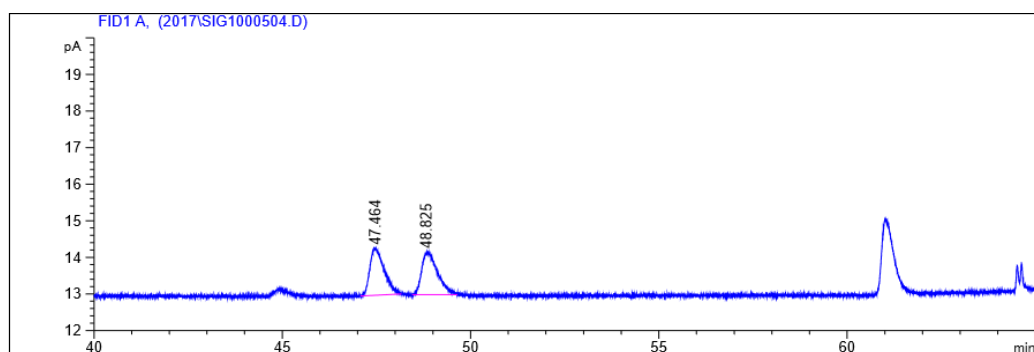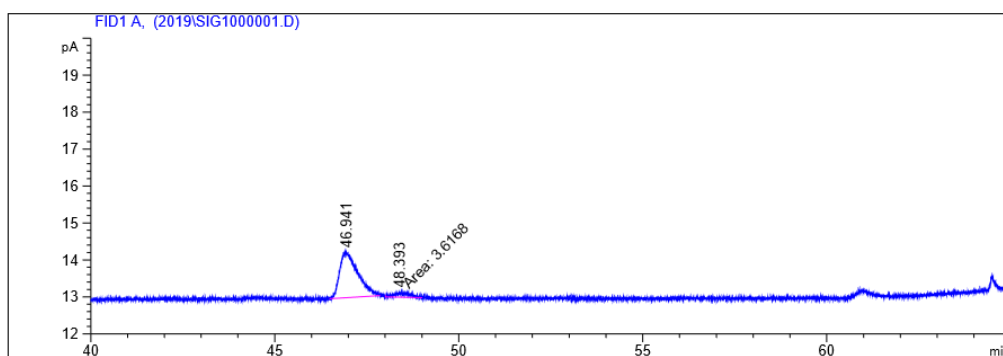

Figure S115: HPLC chromatographs of **3ia**

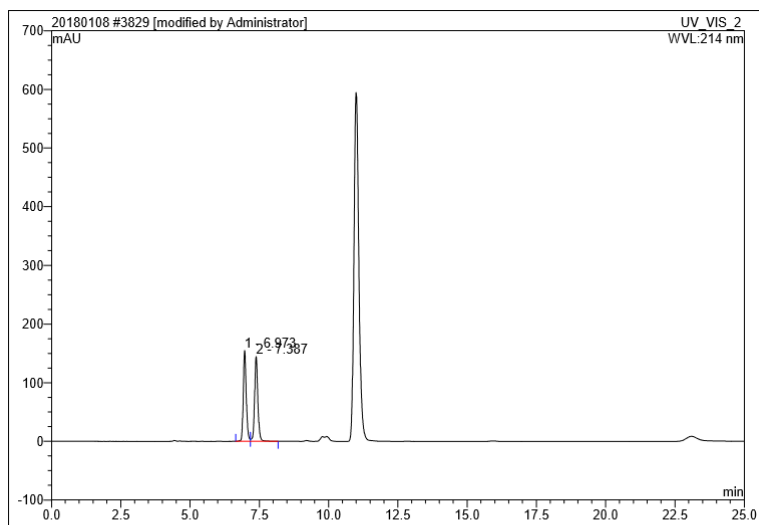

| No. | Ret. Time<br>min | Peak Name | Height<br>mAU | Area<br>mAU*min | Rel. Area<br>% | Amount | Type |
|-----|------------------|-----------|---------------|-----------------|----------------|--------|------|
| 1   | 6.97             | n.a.      | 155.163       | 19.479          | 49.66          | n.a.   | BM   |
| 2   | 7.39             | n.a.      | 144.625       | 19.746          | 50.34          | n.a.   | MB   |

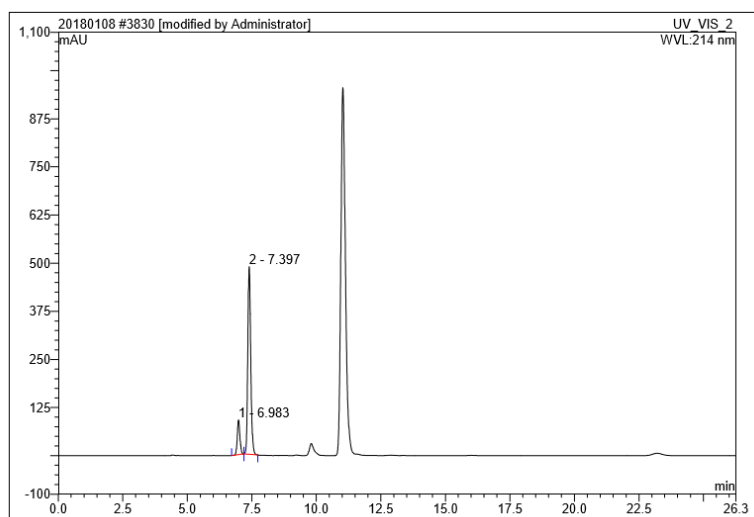

| No. | Ret. Time<br>min | Peak Name | Height<br>mAU | Area<br>mAU*min | Rel. Area<br>% | Amount | Type |
|-----|------------------|-----------|---------------|-----------------|----------------|--------|------|
| 1   | 6.98             | n.a.      | 90.381        | 10.778          | 14.35          | n.a.   | BMb* |
| 2   | 7.40             | n.a.      | 487.751       | 64.337          | 85.65          | n.a.   | bMB* |

**Figure S116: HPLC chromatographs of 3ja**

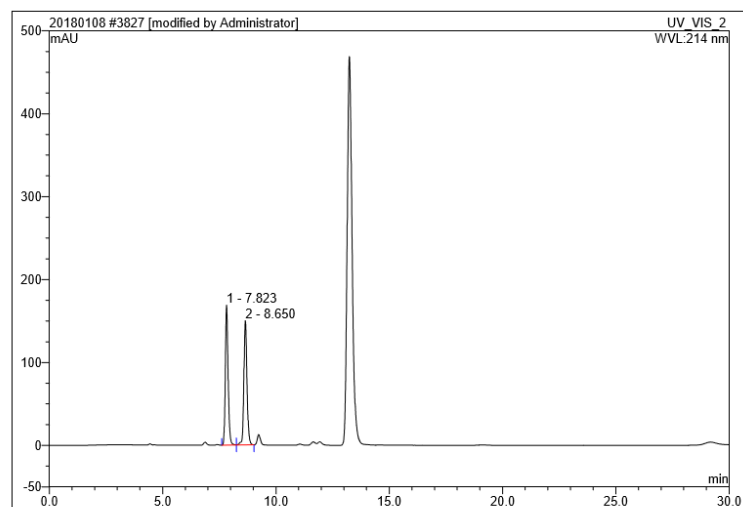

| No. | Ret. Time<br>min | Peak Name | Height<br>mAU | Area<br>mAU*min | Rel.Area<br>% | Amount | Type |
|-----|------------------|-----------|---------------|-----------------|---------------|--------|------|
| 1   | 7.82             | n.a.      | 168.969       | 24.180          | 50.20         | n.a.   | BM * |
| 2   | 8.65             | n.a.      | 149.962       | 23.988          | 49.80         | n.a.   | MB*  |

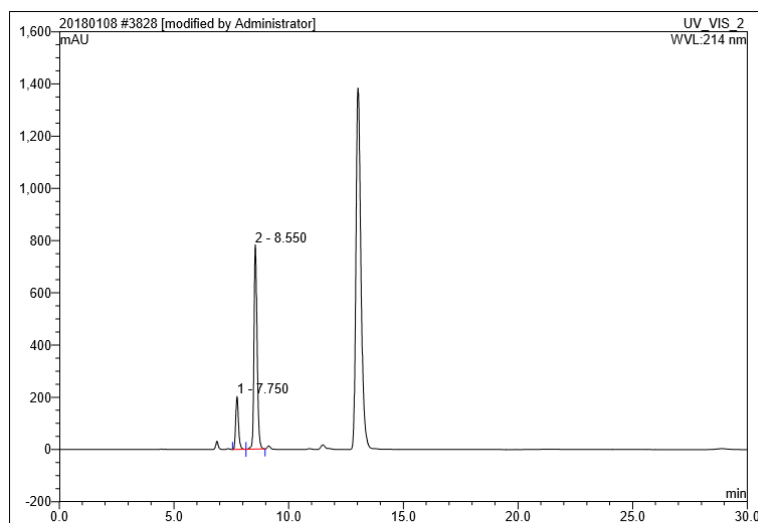

| No.    | Ret. Time<br>min | Peak Name | Height<br>mAU | Area<br>mAU*min | Rel.Area<br>% | Amount | Type |
|--------|------------------|-----------|---------------|-----------------|---------------|--------|------|
| 1      | 7.75             | n.a.      | 203.005       | 28.489          | 18.66         | n.a.   | BM * |
| 2      | 8.55             | n.a.      | 782.960       | 124.199         | 81.34         | n.a.   | MB*  |
| Total: |                  |           | 985.965       | 152.688         | 100.00        | 0.000  |      |

Figure S117: HPLC chromatographs of 3ka

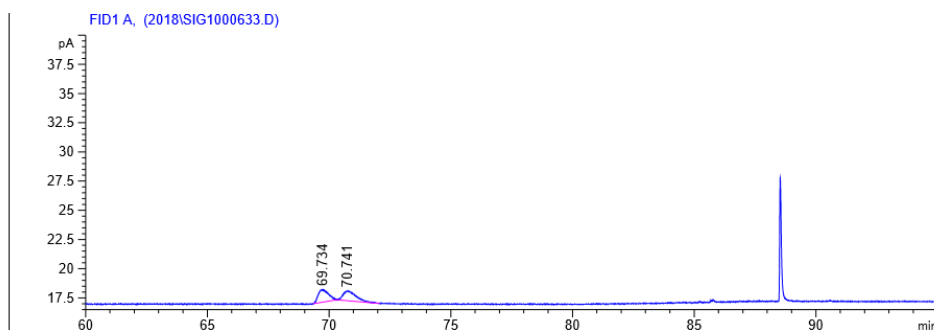

| Peak # | RetTime [min] | Type | Width [min] | Area [pA*s] | Height [pA] | Area %   |
|--------|---------------|------|-------------|-------------|-------------|----------|
| 1      | 69.734        | BB   | 0.3511      | 31.47605    | 1.05806     | 50.66784 |
| 2      | 70.741        | BB   | 0.4427      | 30.64629    | 8.18688e-1  | 49.33216 |

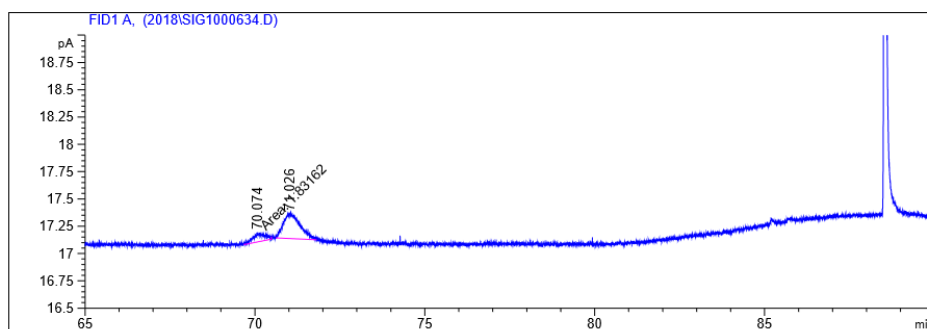

| Peak # | RetTime [min] | Type | Width [min] | Area [pA*s] | Height [pA] | Area %   |
|--------|---------------|------|-------------|-------------|-------------|----------|
| 1      | 70.074        | MM   | 0.3811      | 1.83162     | 8.00932e-2  | 18.74358 |
| 2      | 71.026        | BB   | 0.4261      | 7.94035     | 2.21558e-1  | 81.25642 |

Figure S118: HPLC chromatographs of 3la

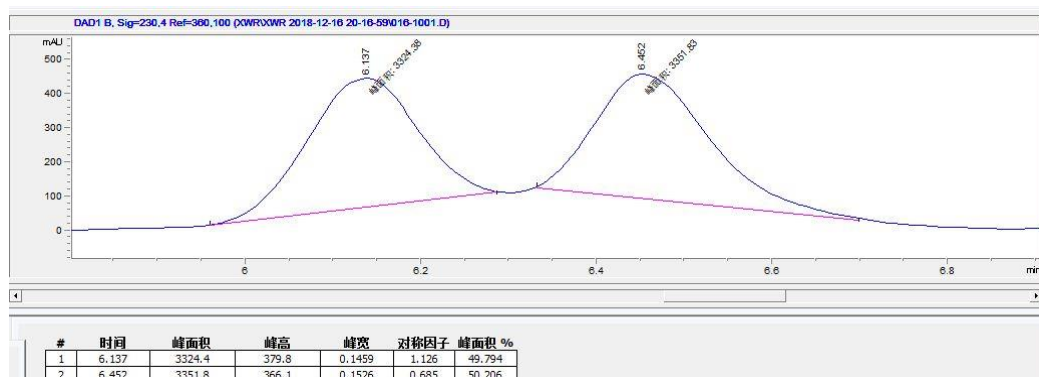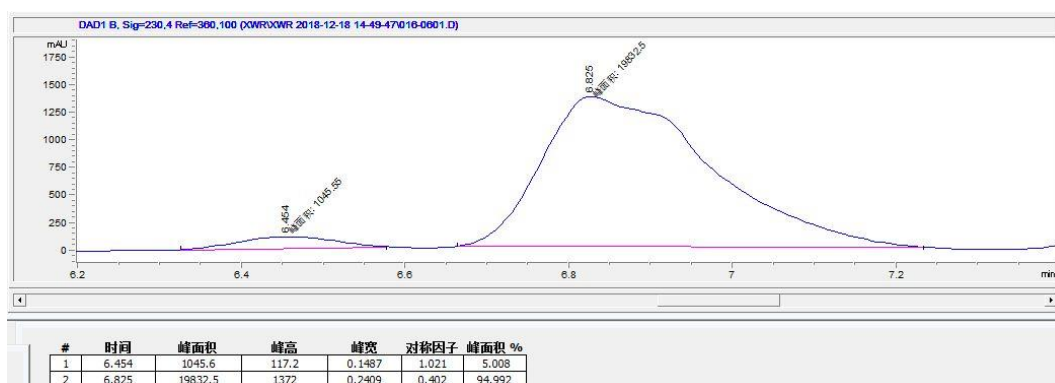

Figure S119: HPLC chromatographs of 3ma

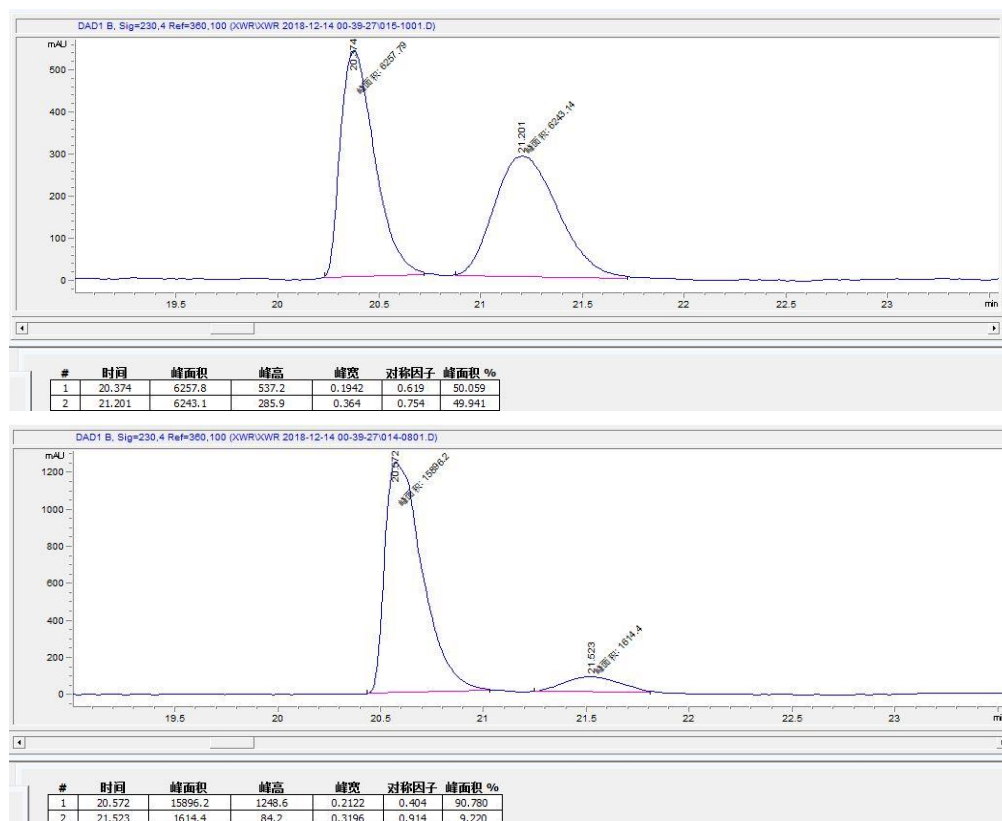

Figure S120: HPLC chromatographs of 3na

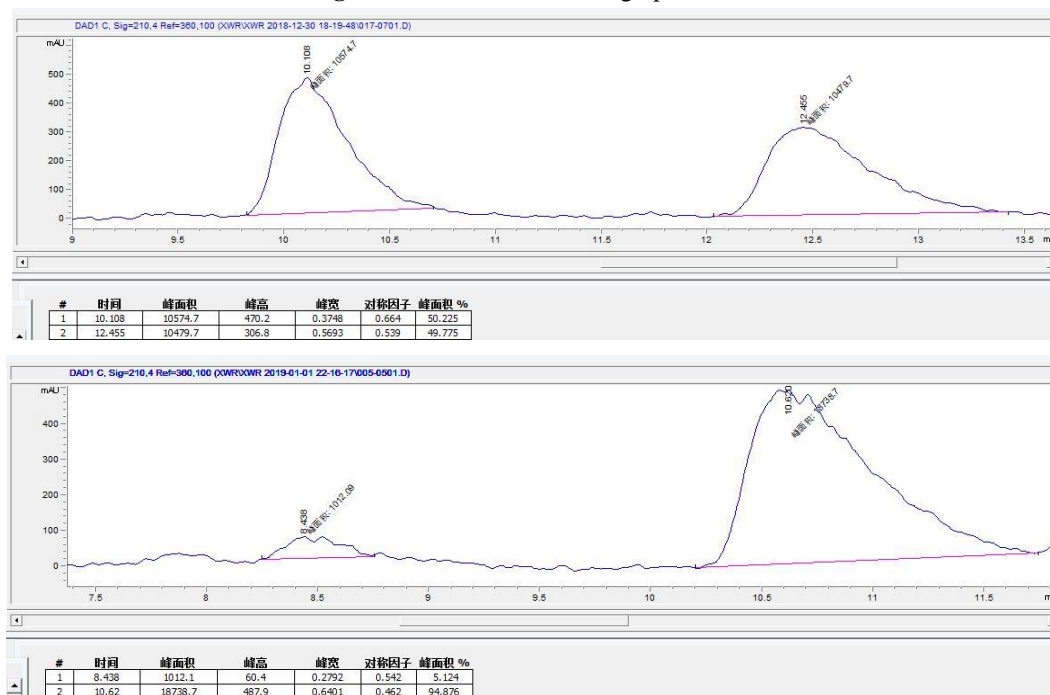

Figure S121: HPLC chromatographs of 3oa

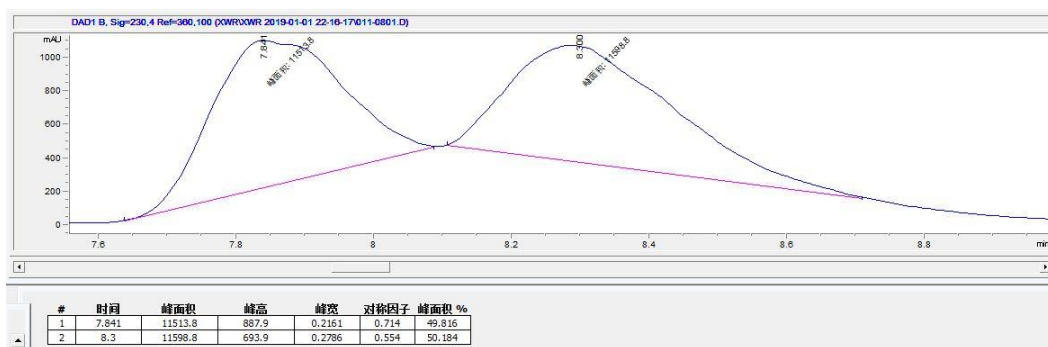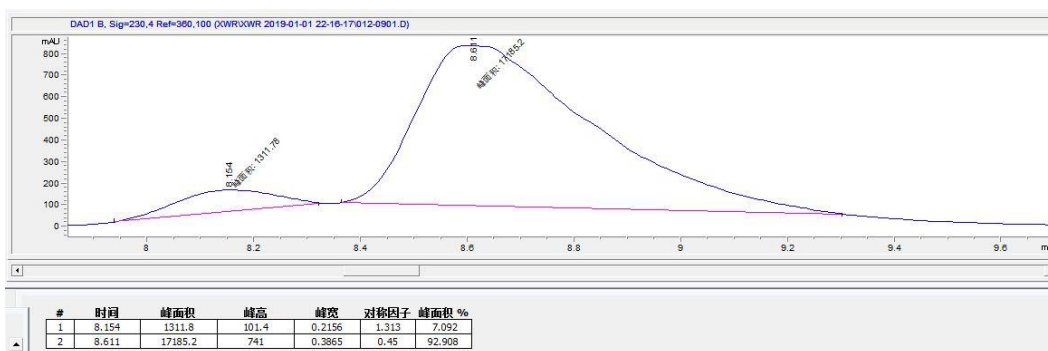

Figure S122: HPLC chromatographs of **3pa**

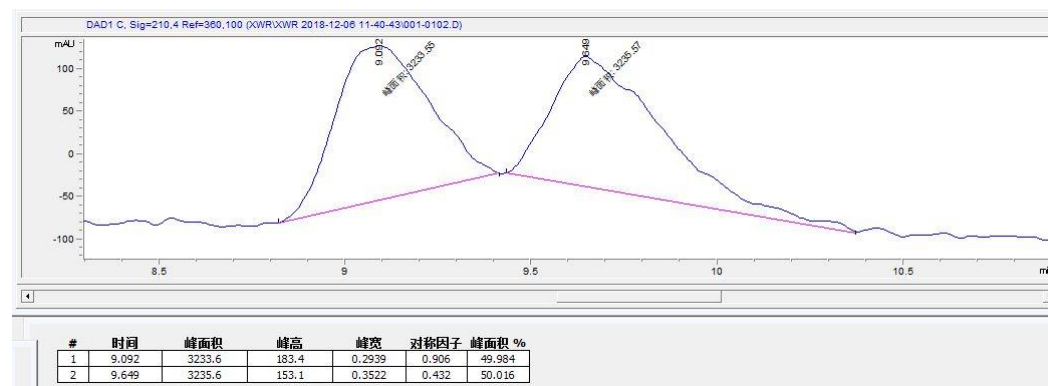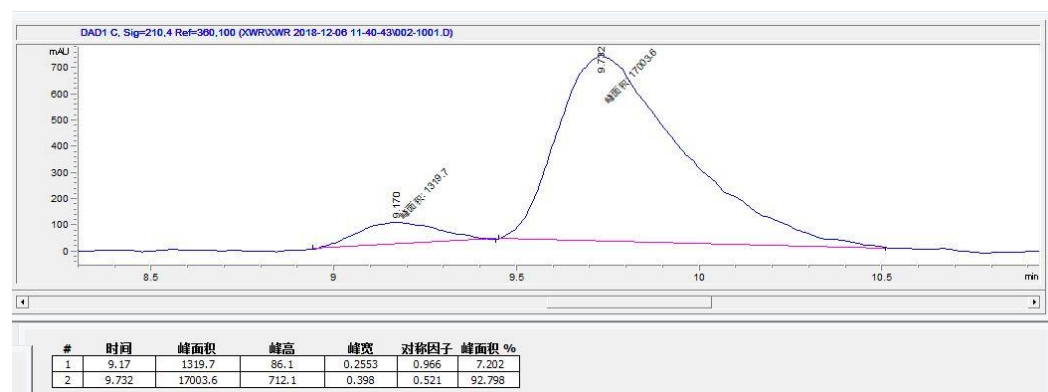

Figure S123: HPLC chromatographs of **3qa**

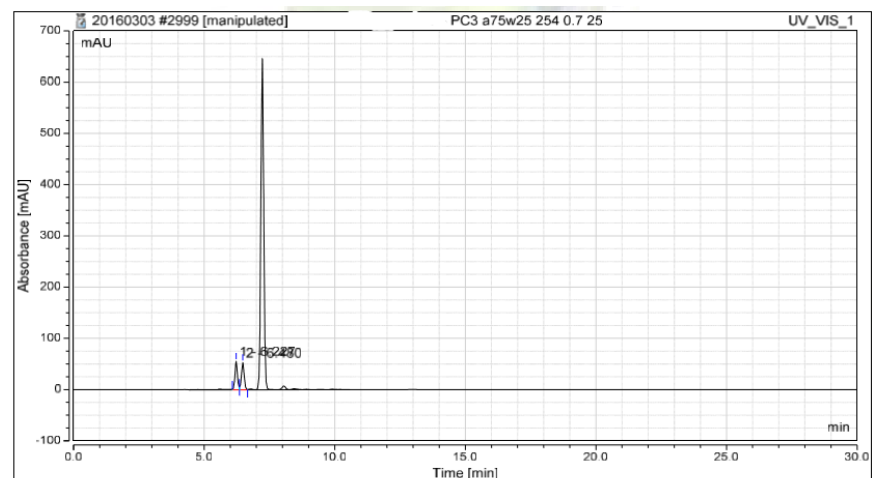

| Integration Results |                       |                       |                 |               |                    |
|---------------------|-----------------------|-----------------------|-----------------|---------------|--------------------|
| No.                 | Retention Time<br>min | Retention Time<br>min | Area<br>mAU*min | Height<br>mAU | Relative Area<br>% |
| 1                   | 6                     | 6.227                 | 6.243           | 55.910        | 49.73              |
| 2                   | 6                     | 6.480                 | 6.310           | 53.161        | 50.27              |

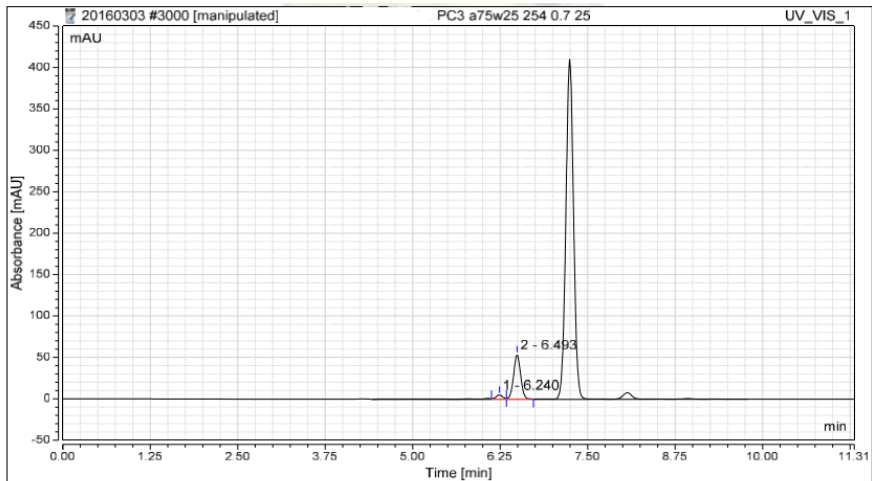

| Integration Results |                       |                       |                 |               |                    |
|---------------------|-----------------------|-----------------------|-----------------|---------------|--------------------|
| No.                 | Retention Time<br>min | Retention Time<br>min | Area<br>mAU*min | Height<br>mAU | Relative Area<br>% |
| 1                   | 6                     | 6.240                 | 0.621           | 5.375         | 8.90               |
| 2                   | 6                     | 6.493                 | 6.348           | 54.228        | 91.10              |

Figure S124: HPLC chromatographs of **3ra**

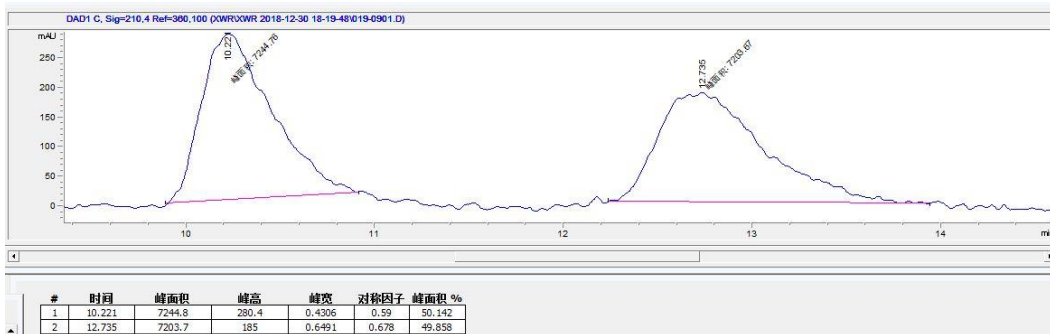

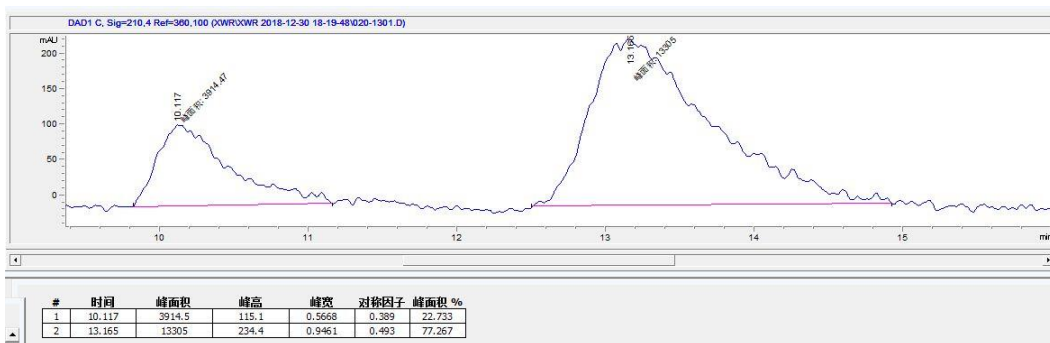

Figure S125: HPLC chromatographs of **3sa**

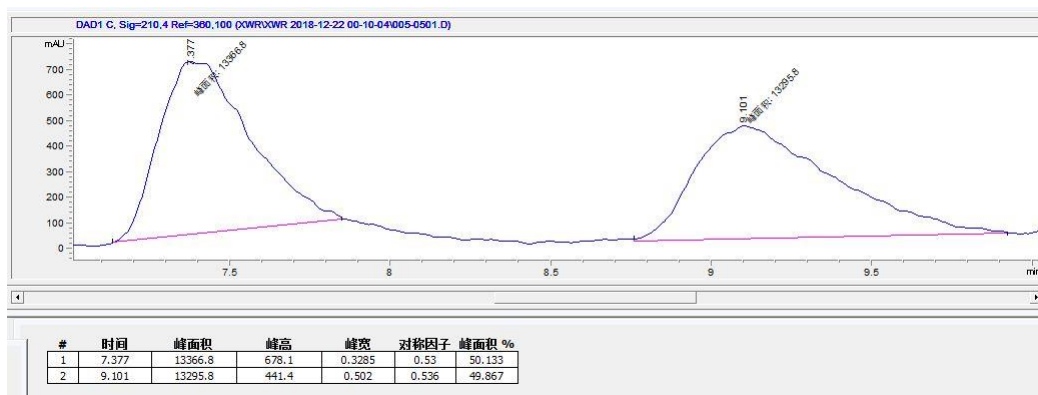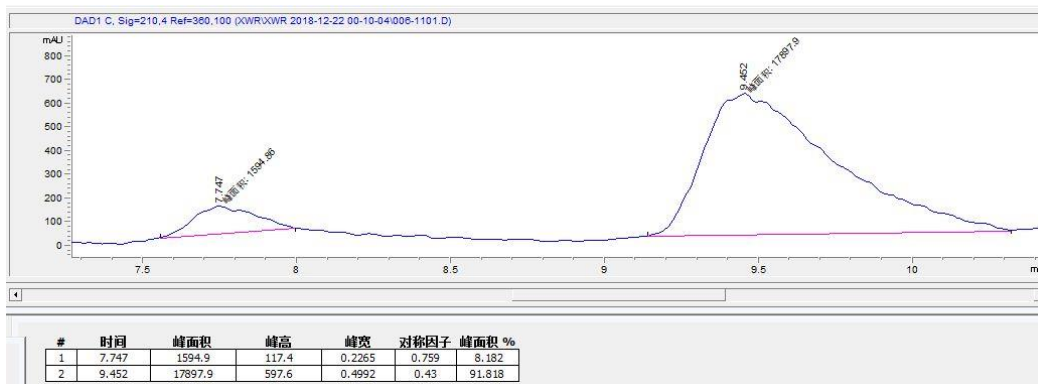

Figure S126: HPLC chromatographs of **3ta**

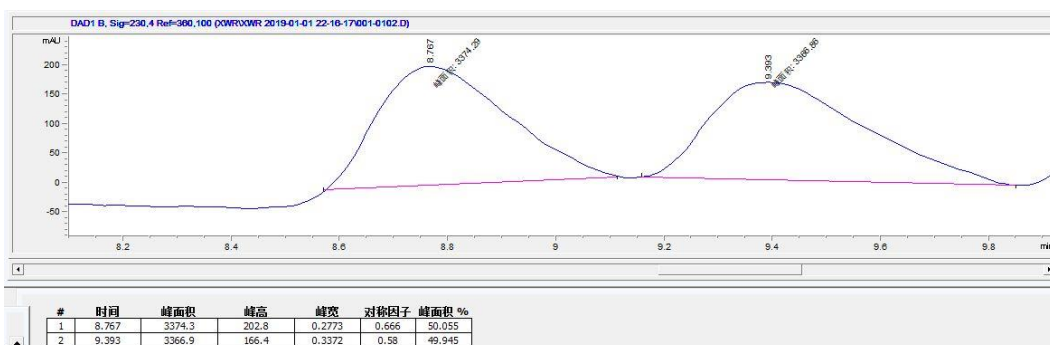



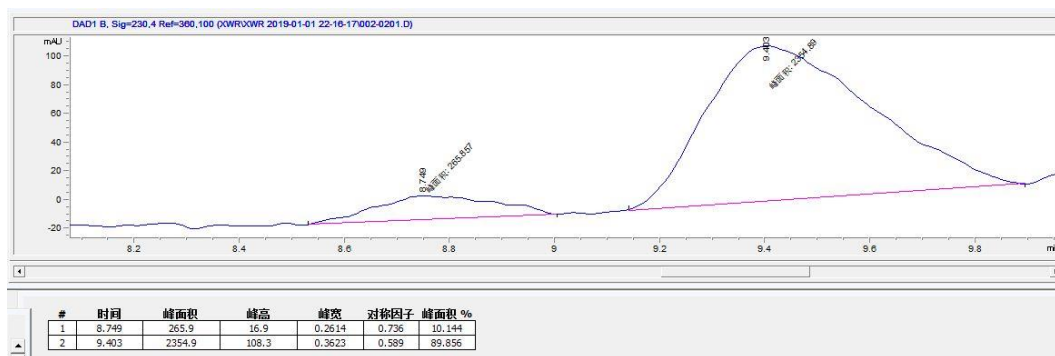

Figure S127: HPLC chromatographs of **3ua**

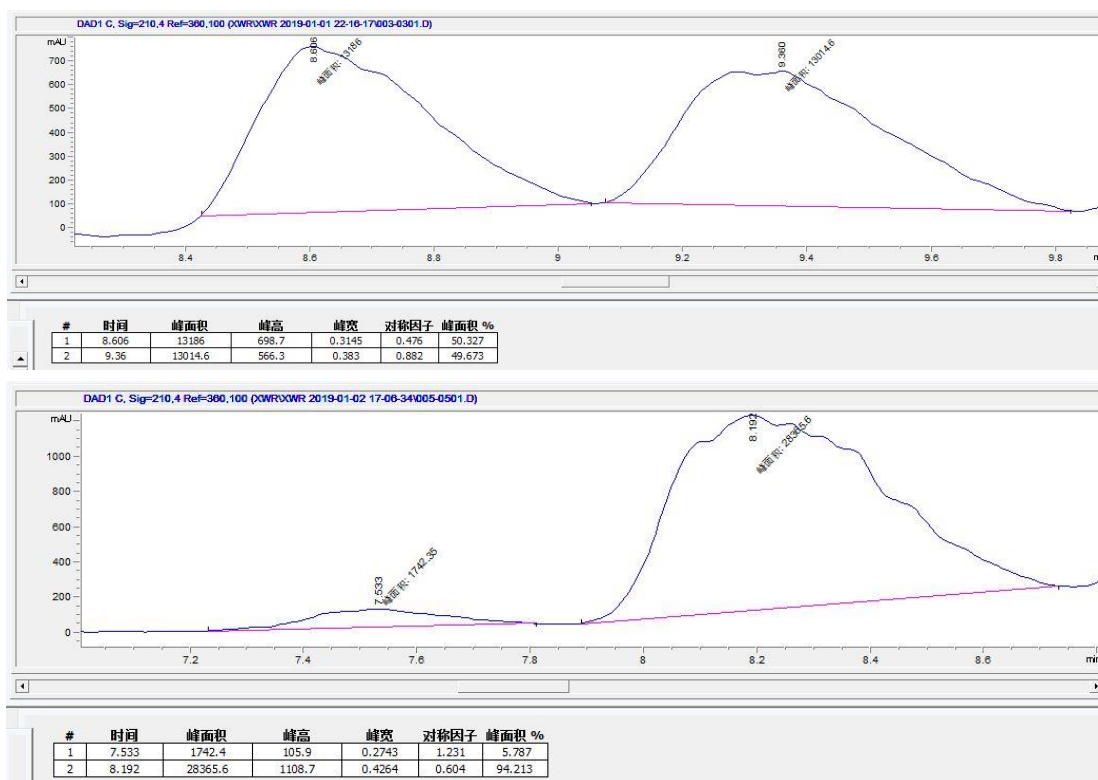

Figure S128: HPLC chromatographs of **3va**

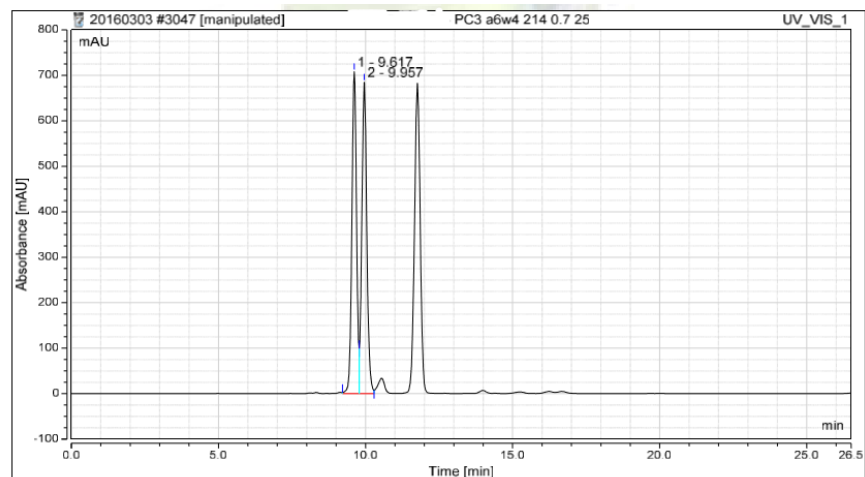

#### Integration Results

| No. | Retention Time<br>min | Retention Time<br>min | Area<br>mAU*min | Height<br>mAU | Relative Area<br>% |
|-----|-----------------------|-----------------------|-----------------|---------------|--------------------|
| 1   | 10                    | 9.617                 | 128.644         | 708.044       | 48.83              |
| 2   | 10                    | 9.957                 | 134.819         | 685.106       | 51.17              |

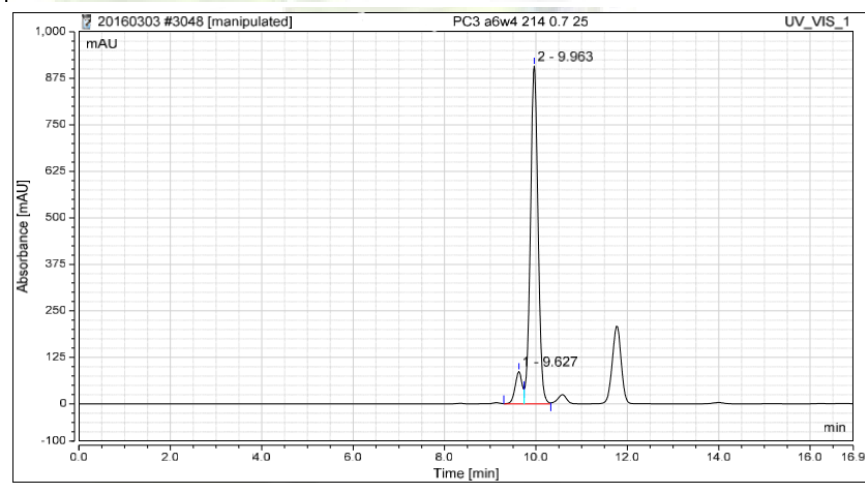

#### Integration Results

| No. | Retention Time<br>min | Retention Time<br>min | Area<br>mAU*min | Height<br>mAU | Relative Area<br>% |
|-----|-----------------------|-----------------------|-----------------|---------------|--------------------|
| 1   | 10                    | 9.627                 | 15.397          | 87.353        | 8.07               |
| 2   | 10                    | 9.963                 | 175.497         | 908.190       | 91.93              |

**Figure S129:** HPLC chromatographs of **3wa**

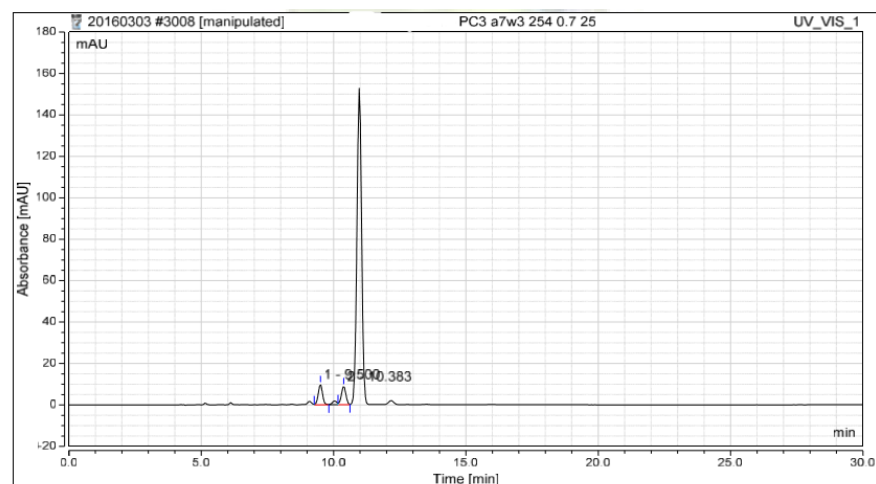

#### Integration Results

| No. | Retention Time<br>min | Retention Time<br>min | Area<br>mAU*min | Height<br>mAU | Relative Area<br>% |
|-----|-----------------------|-----------------------|-----------------|---------------|--------------------|
| 1   | 10                    | 9.500                 | 1.816           | 9.988         | 50.79              |
| 2   | 10                    | 10.383                | 1.760           | 8.916         | 49.21              |

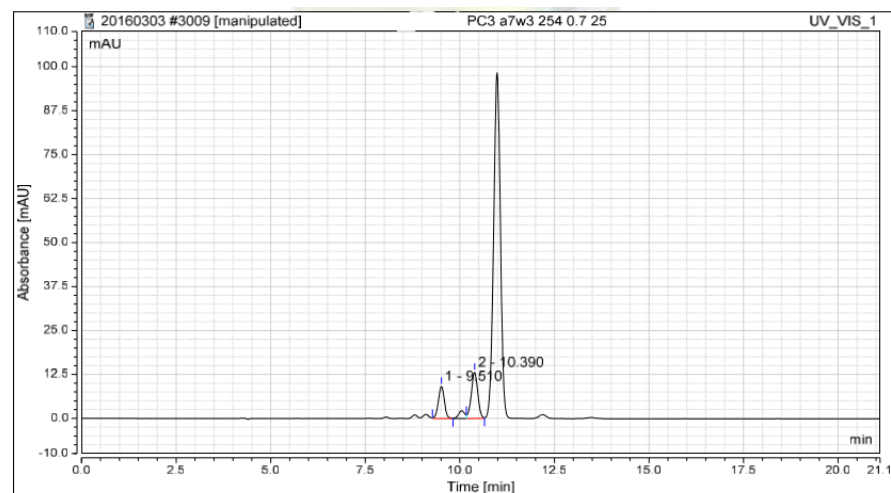

#### Integration Results

| No. | Retention Time<br>min | Retention Time<br>min | Area<br>mAU*min | Height<br>mAU | Relative Area<br>% |
|-----|-----------------------|-----------------------|-----------------|---------------|--------------------|
| 1   | 10                    | 9.510                 | 1.679           | 9.283         | 38.88              |
| 2   | 10                    | 10.390                | 2.640           | 13.228        | 61.12              |

Figure S130: HPLC chromatographs of **3xa**

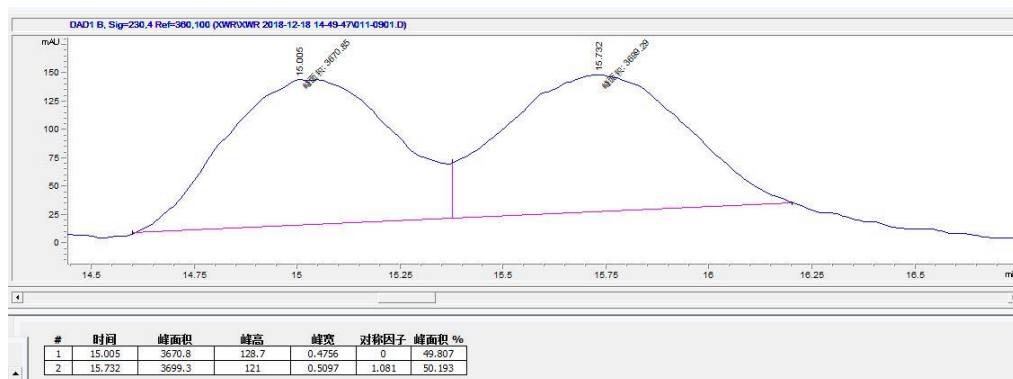

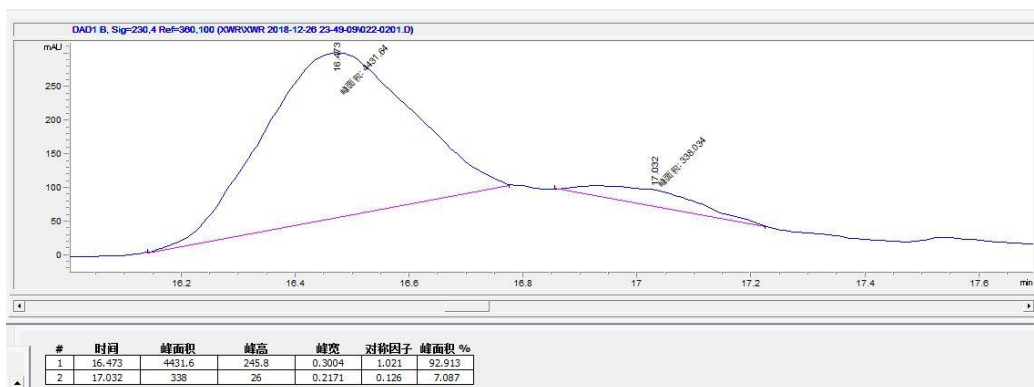

Figure S131: HPLC chromatographs of **3ya**

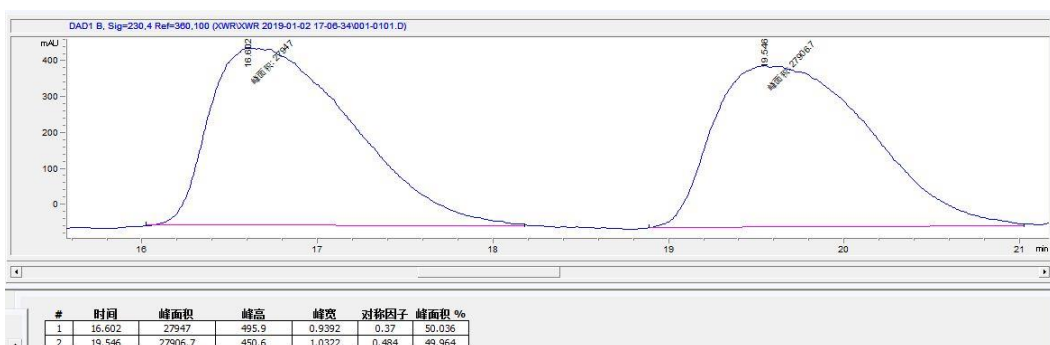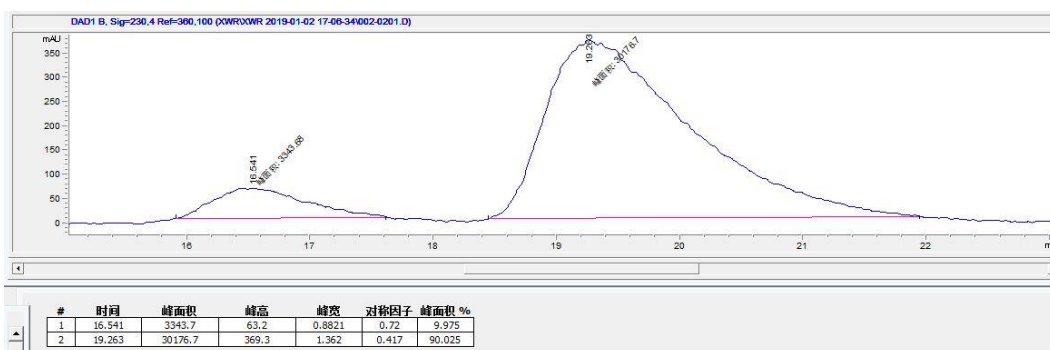

Figure S132: HPLC chromatographs of **3za**

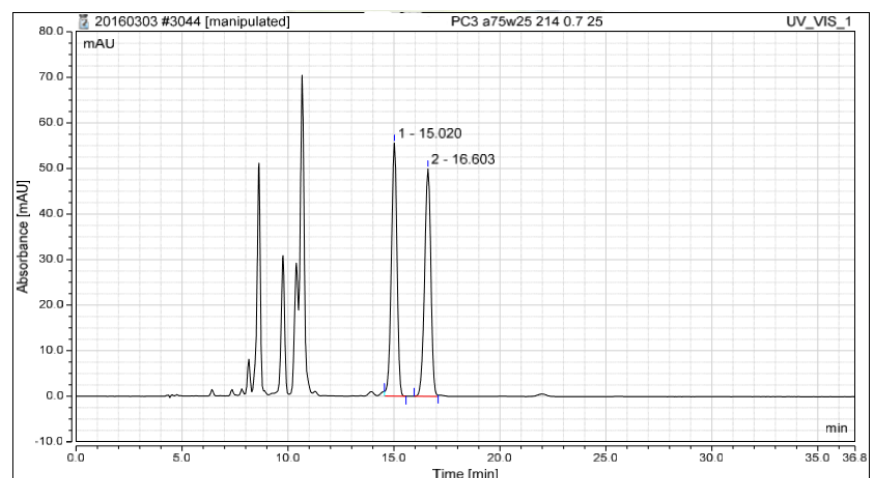

| Integration Results |                       |                       |                 |               |                    |
|---------------------|-----------------------|-----------------------|-----------------|---------------|--------------------|
| No.                 | Retention Time<br>min | Retention Time<br>min | Area<br>mAU*min | Height<br>mAU | Relative Area<br>% |
| 1                   | 15                    | 15.020                | 17.106          | 55.570        | 50.07              |
| 2                   | 17                    | 16.603                | 17.060          | 49.961        | 49.93              |

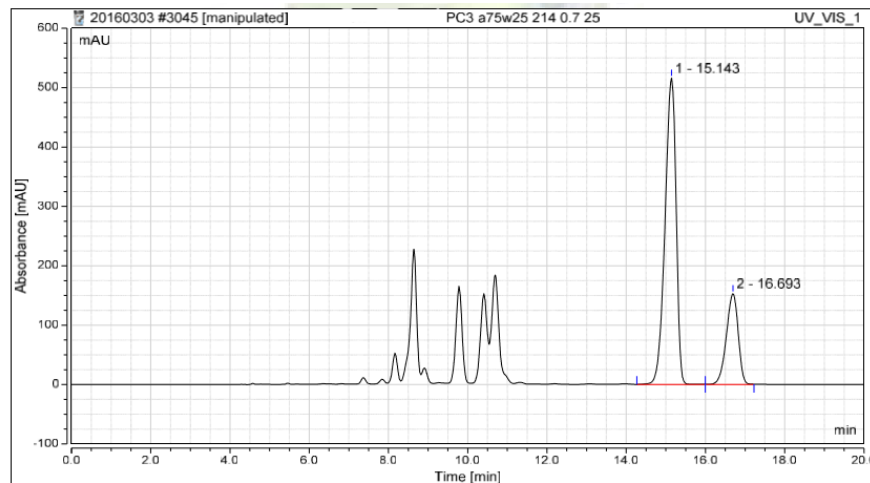

| Integration Results |                       |                       |                 |               |                    |
|---------------------|-----------------------|-----------------------|-----------------|---------------|--------------------|
| No.                 | Retention Time<br>min | Retention Time<br>min | Area<br>mAU*min | Height<br>mAU | Relative Area<br>% |
| 1                   | 15                    | 15.143                | 168.520         | 516.256       | 75.93              |
| 2                   | 17                    | 16.693                | 53.430          | 153.392       | 24.07              |

**Figure S133: HPLC chromatographs of 3x'a**

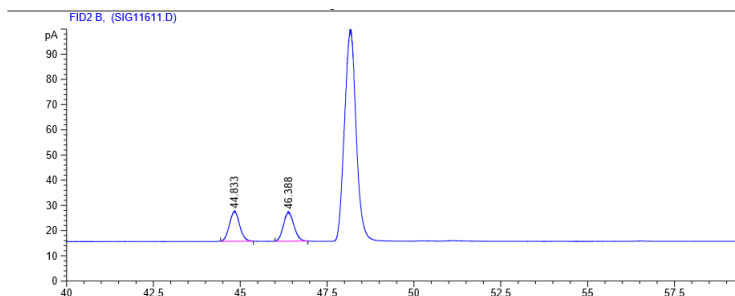

| Peak # | RetTime [min] | Type | Width [min] | Area [pA*s] | Height [pA] | Area %   |
|--------|---------------|------|-------------|-------------|-------------|----------|
| 1      | 44.833        | BBA  | 0.2470      | 242.47057   | 11.83693    | 50.18971 |
| 2      | 46.388        | BBA  | 0.2457      | 240.63754   | 11.61718    | 49.81029 |

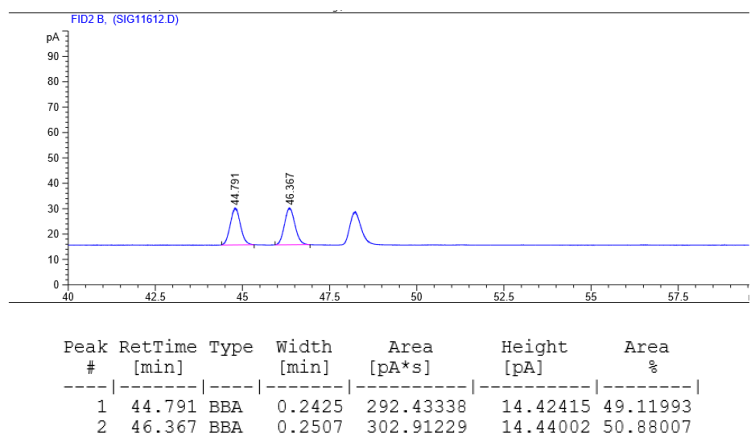

Figure S134: HPLC chromatographs of 3y'a

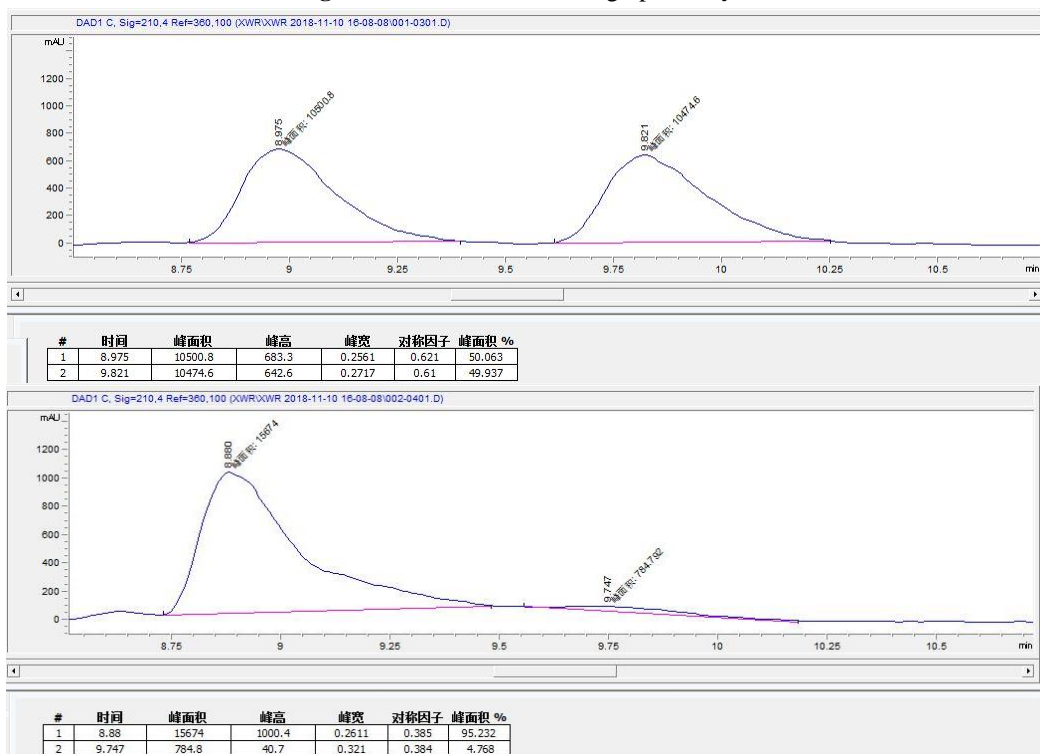

Figure S135: HPLC chromatographs of 3ab

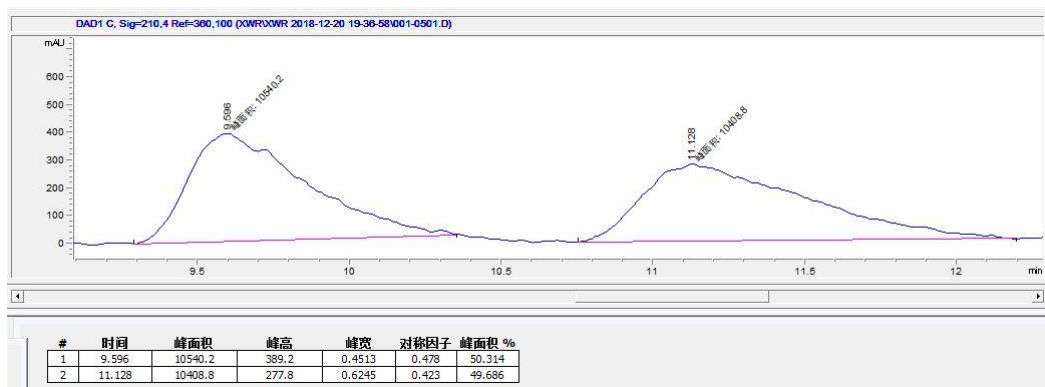

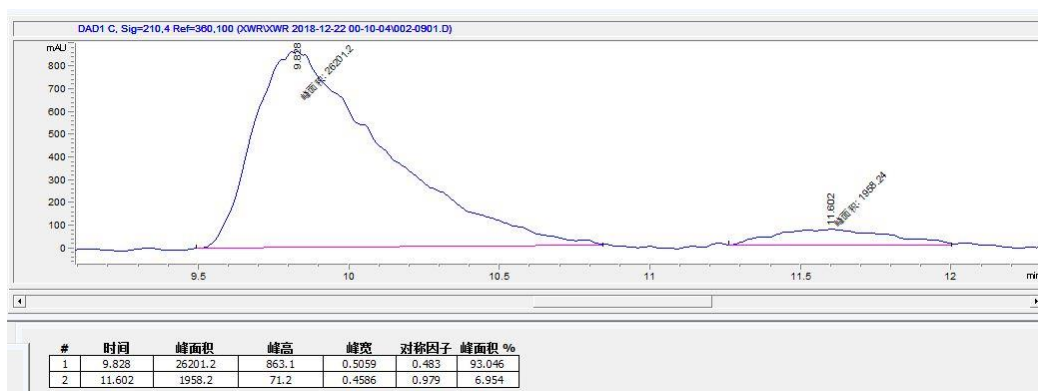

Figure S136: HPLC chromatographs of **3ac**

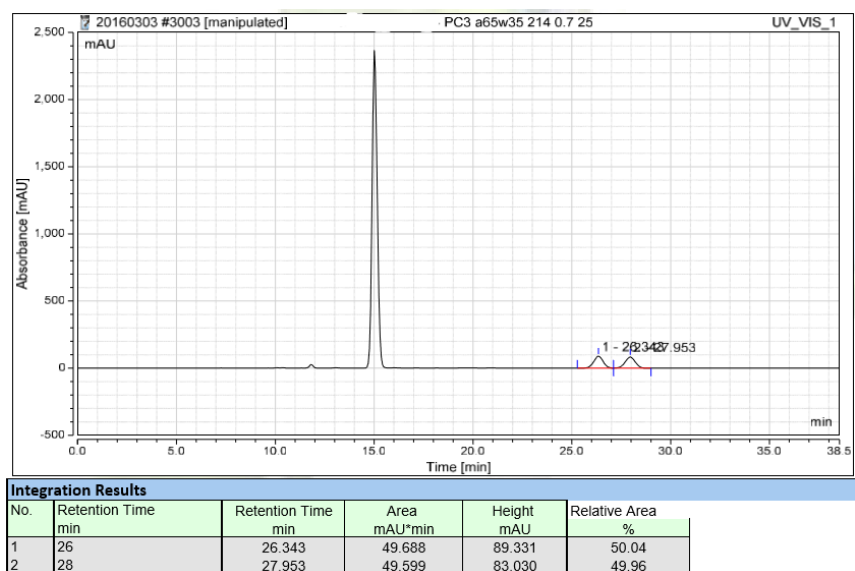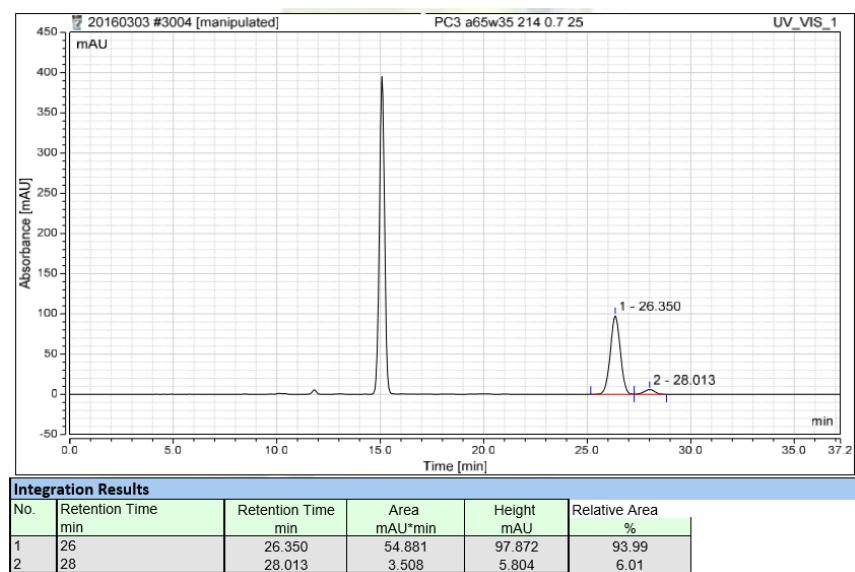

Figure S137: HPLC chromatographs of **3ad**

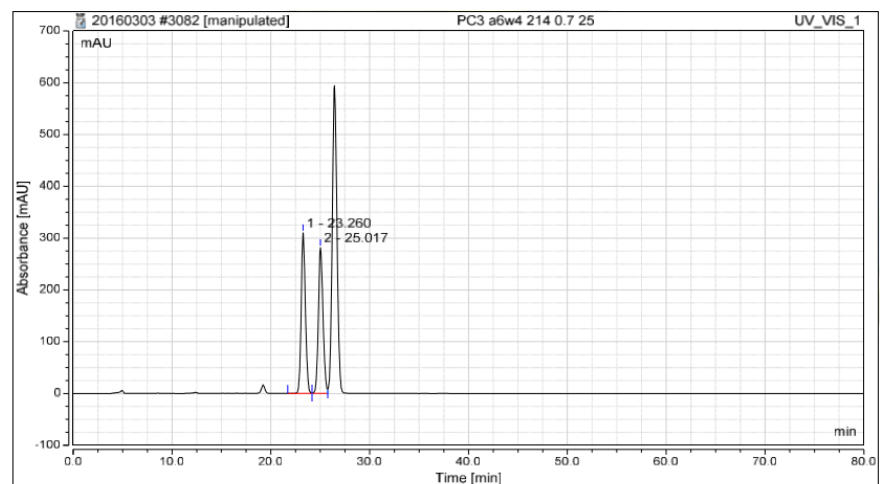

#### Integration Results

| No. | Retention Time<br>min | Retention Time<br>min | Area<br>mAU*min | Height<br>mAU | Relative Area<br>% |
|-----|-----------------------|-----------------------|-----------------|---------------|--------------------|
| 1   | 23                    | 23.260                | 151.544         | 310.204       | 50.02              |
| 2   | 25                    | 25.017                | 151.452         | 281.710       | 49.98              |

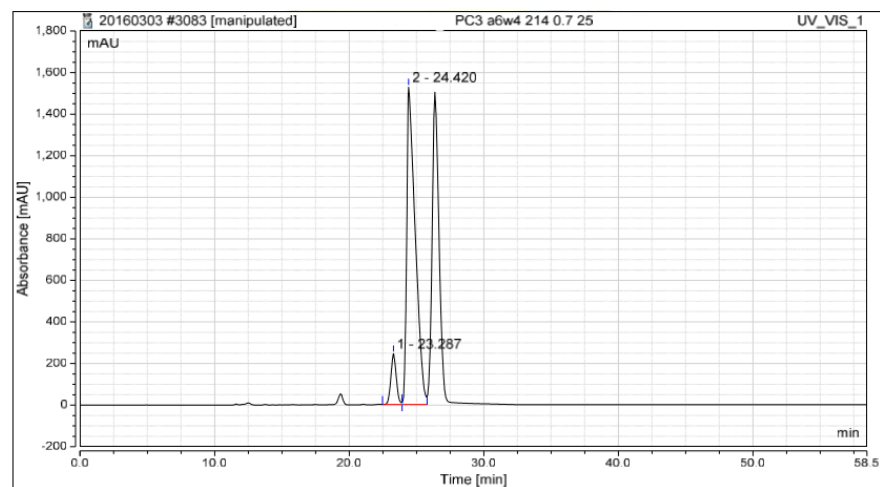

#### Integration Results

| No. | Retention Time<br>min | Retention Time<br>min | Area<br>mAU*min | Height<br>mAU | Relative Area<br>% |
|-----|-----------------------|-----------------------|-----------------|---------------|--------------------|
| 1   | 23                    | 23.287                | 113.351         | 244.333       | 9.20               |
| 2   | 24                    | 24.420                | 1118.747        | 1527.322      | 90.80              |

Figure S138: HPLC chromatographs of **3ae**

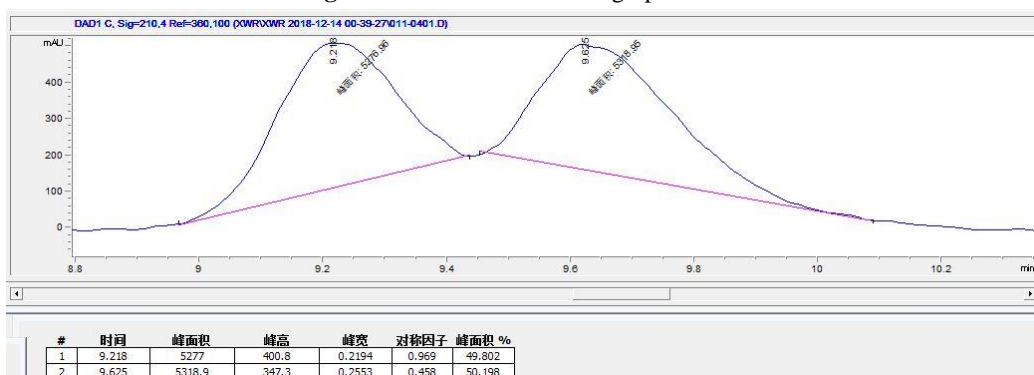



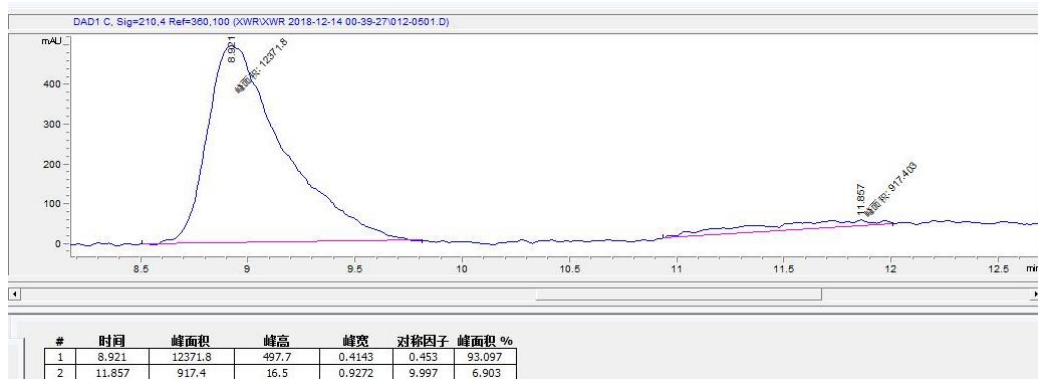

Figure S139: HPLC chromatographs of **3af**

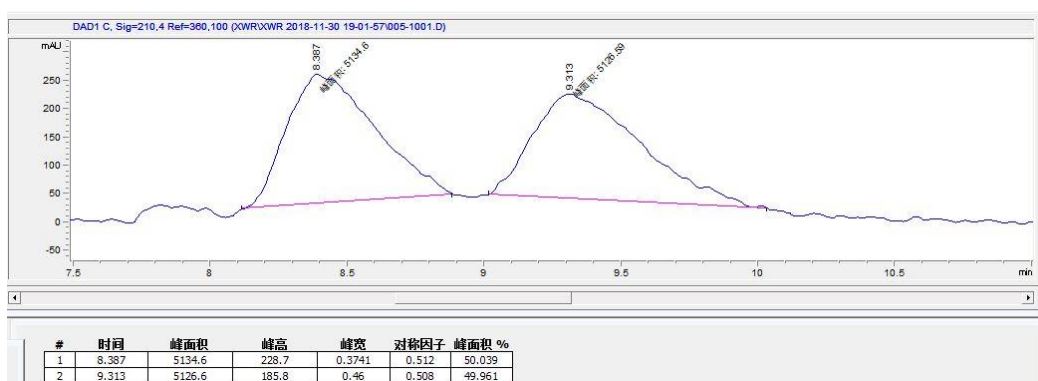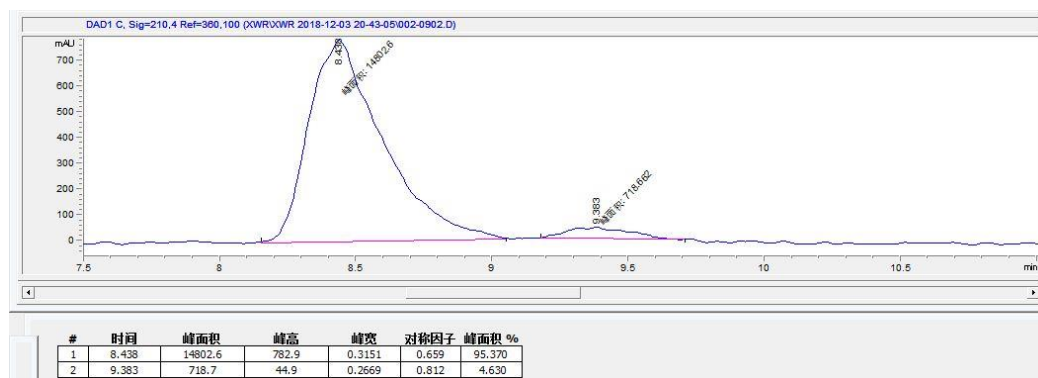

Figure S140: HPLC chromatographs of **3ag**

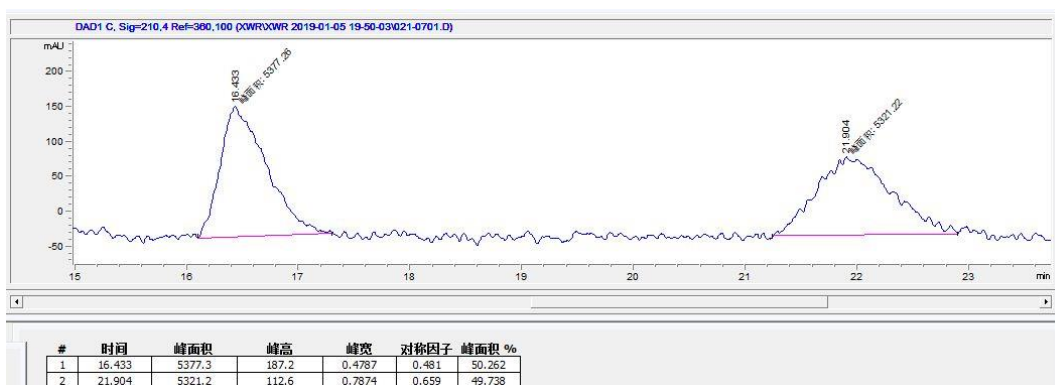

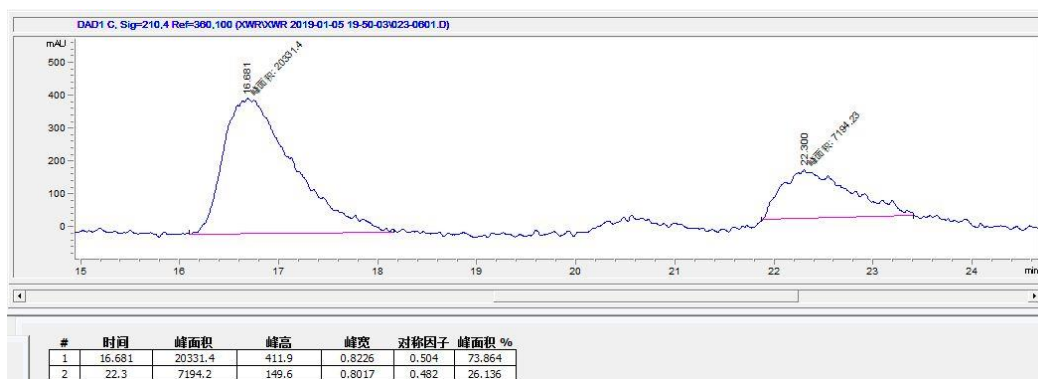

Figure S141: HPLC chromatographs of **3ah**

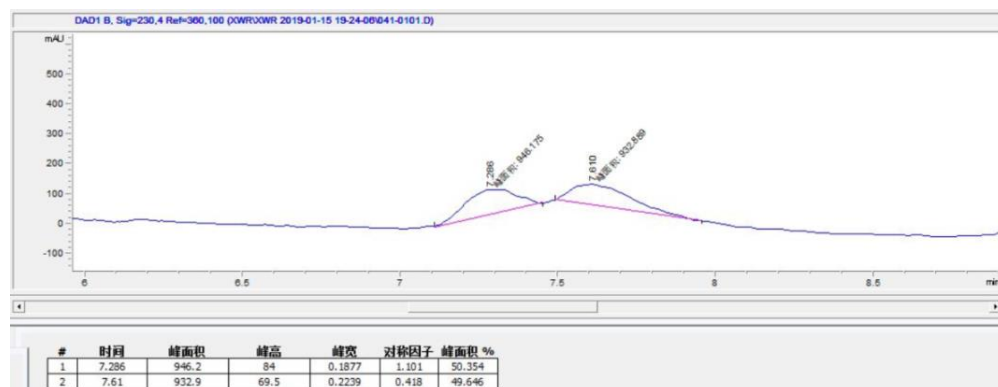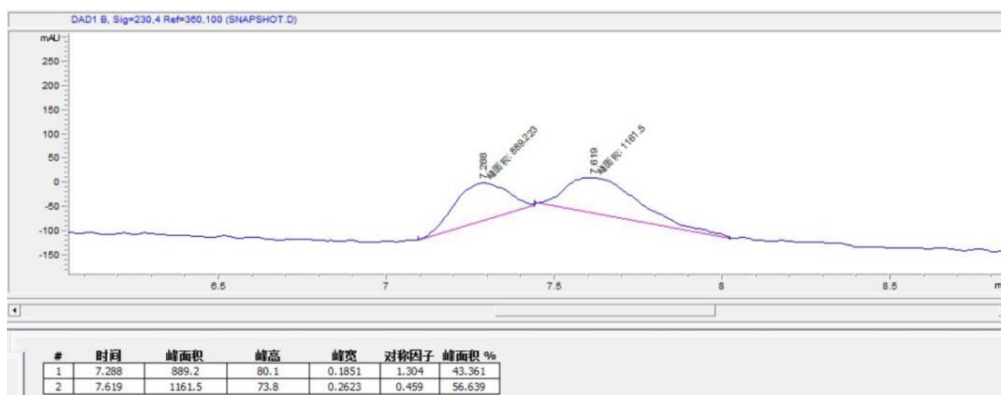

Figure S142: HPLC chromatographs of **3ej**

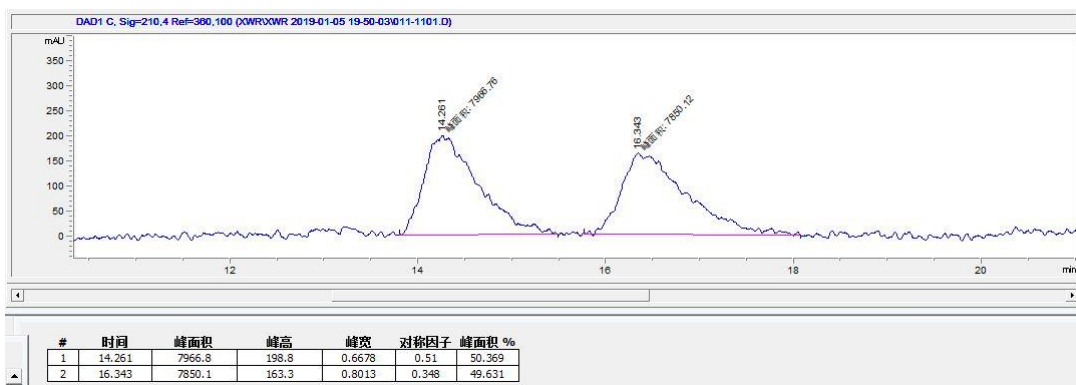

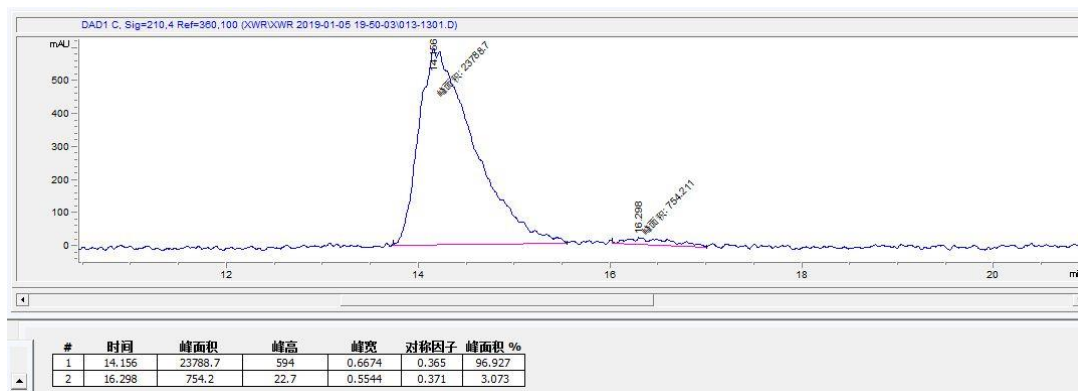

Figure S143: HPLC chromatographs of **3aa** of gram-scale experiment

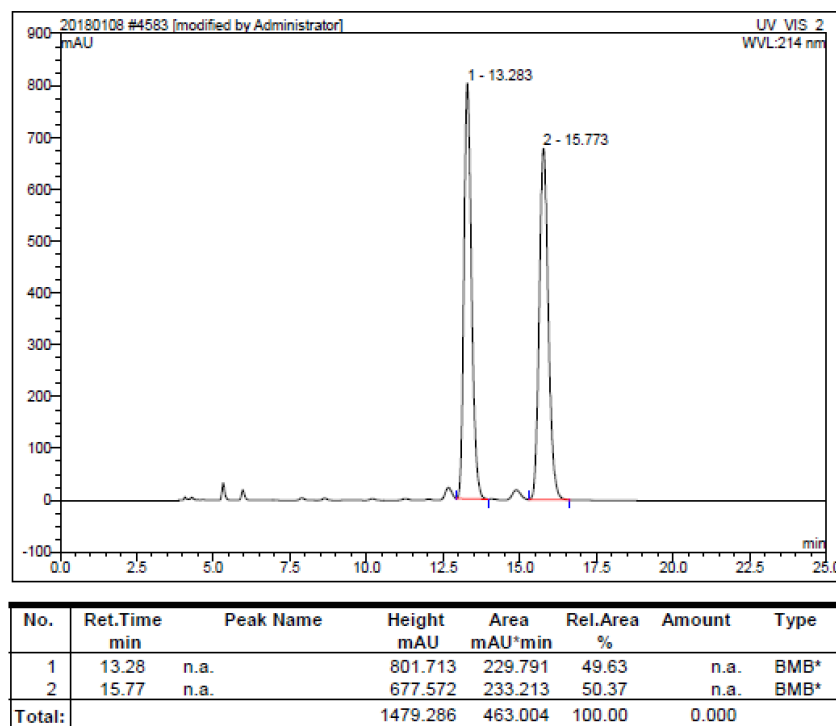

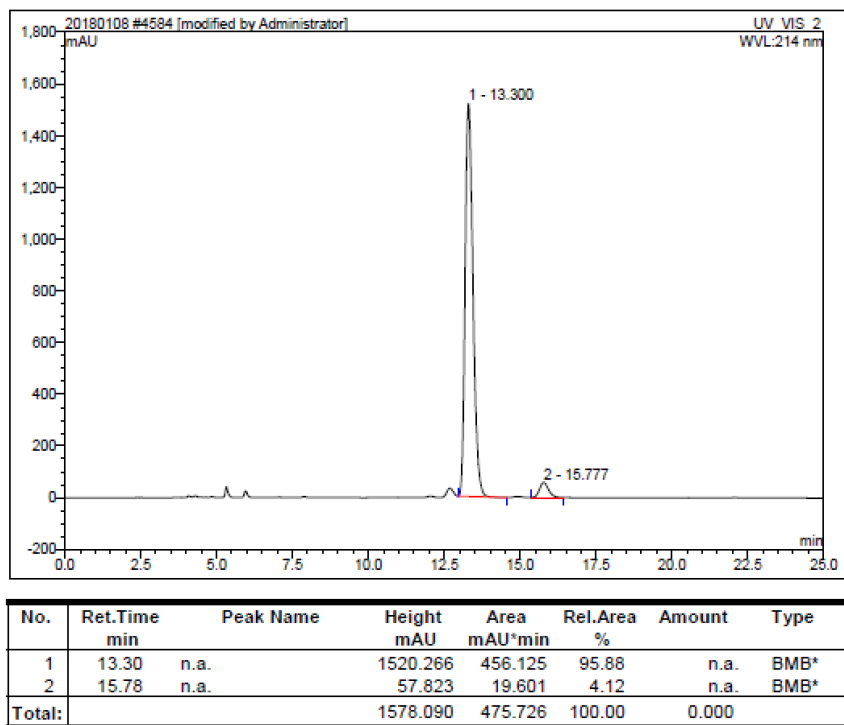

**Figure S144:** HPLC chromatographs of **5a**
